# Supplementary material for: Markers of microglia in post-mortem brain samples from patients with Alzheimer’s disease: a systematic review
Source: PubMed Central journal article supplement — Mol Psychiatry. 2017 Dec 12;23(2):177–98. doi: 10.1038/mp.2017.246 (PMC5794890; doi:10.1038/mp.2017.246), 2017-12-12
Supplement: mp2017246x1.pdf [file mp2017246x1.pdf]

## SUPPLEMENTARY MATERIALS

### Supplemental tables:

Table 1: Summary of microglial marker functions and expression

| Marker                                            | Molecule Function                                                                                                                                                                                                                               | M1 or M2 Phenotype                                                                                                                                                             | Expression on other cell types                                                                                                                                                       |
|---------------------------------------------------|-------------------------------------------------------------------------------------------------------------------------------------------------------------------------------------------------------------------------------------------------|--------------------------------------------------------------------------------------------------------------------------------------------------------------------------------|--------------------------------------------------------------------------------------------------------------------------------------------------------------------------------------|
| HLA-DR (MHC II) <sup>14, 60</sup>                 | <ul style="list-style-type: none"> <li>• Antigen recognition and display, activation of the adaptive immune response</li> </ul>                                                                                                                 | M1 and M2b                                                                                                                                                                     | All antigen presenting cells (macrophages, B cells, dendritic cells), activated T cells                                                                                              |
| Iba1 <sup>57-60</sup>                             | <ul style="list-style-type: none"> <li>• Binds actin</li> <li>• Participates in membrane reorganization and phagocytosis</li> </ul>                                                                                                             | <ul style="list-style-type: none"> <li>• Labels all microglia regardless of phenotype (resting or activated)</li> <li>• Some increase in expression with activation</li> </ul> | Monocyte lineage cells                                                                                                                                                               |
| CD68 <sup>14, 60</sup>                            | Lysosome marker, upregulated with phagocytosis                                                                                                                                                                                                  | M2                                                                                                                                                                             | Monocyte lineage cells, including perivascular or infiltrating macrophages                                                                                                           |
| CD11b <sup>14, 15, 60, 90</sup>                   | <ul style="list-style-type: none"> <li>• Forms part of complement receptor 3</li> <li>• Monocyte activation, adhesion, and migration</li> <li>• Involved in recognition and phagocytosis of amyloid-<math>\beta</math></li> </ul>               | <ul style="list-style-type: none"> <li>• Labels all microglia regardless of phenotype (resting or activated)</li> <li>• Some increase in expression with activation</li> </ul> | Neutrophils, natural killer cells, macrophages                                                                                                                                       |
| CD45 <sup>92, 195</sup>                           | <ul style="list-style-type: none"> <li>• Transmembrane protein, receptor-linked protein tyrosine phosphatase</li> <li>• Involved in signal transduction and leukocyte activation</li> </ul>                                                     | <ul style="list-style-type: none"> <li>• Labels all microglia regardless of phenotype (resting or activated)</li> <li>• Some increase in expression with activation</li> </ul> | Most nucleated hematopoietic lineage cells, including T cell and macrophages                                                                                                         |
| Ferritin + cells <sup>96, 97, 196</sup>           | <ul style="list-style-type: none"> <li>• Generation of free radicals to perpetuate the immune response</li> </ul>                                                                                                                               | M1                                                                                                                                                                             | Astrocytes, macrophages, all cells. L-ferritin upregulated with activation in microglia                                                                                              |
| CD33 <sup>66, 70</sup>                            | <ul style="list-style-type: none"> <li>• Cell adhesion, migration</li> <li>• May be involved with amyloid-<math>\beta</math> phagocytosis in the brain</li> </ul>                                                                               | M2                                                                                                                                                                             | Neurons and myeloid lineage cells, including macrophages, neutrophils                                                                                                                |
| TREM2 <sup>61, 105</sup>                          | <ul style="list-style-type: none"> <li>• Mediates TLR4 signalling</li> <li>• May contribute to phagocytosis, particularly of degenerating neurons</li> </ul>                                                                                    | Thought to be M2                                                                                                                                                               | Myeloid lineage cells, including macrophages, neutrophils                                                                                                                            |
| CD11c <sup>197</sup>                              | <ul style="list-style-type: none"> <li>• Transmembrane cell surface integrin, acts as a receptor to various ligands</li> <li>• Involved in innate immune activation</li> </ul>                                                                  | <ul style="list-style-type: none"> <li>• Unclear, CD11+ cells express both M1 and M2 markers</li> </ul>                                                                        | Monocytes, macrophages, dendritic cells, neutrophils, some B cells and activated T cells                                                                                             |
| IL-1 $\alpha$ expressing microglia <sup>198</sup> | <ul style="list-style-type: none"> <li>• Stimulates immune cell activation, proliferation</li> <li>• Helps stimulate the production of other pro-inflammatory cytokines, such as TNF-<math>\alpha</math> and IFN-<math>\gamma</math></li> </ul> | M1                                                                                                                                                                             | This analysis is intended to be restricted to IL-1 $\alpha$ + microglia, however infiltrating or perivascular macrophages can be difficult to distinguish from parenchymal microglia |
| RCA-1 <sup>114, 199</sup>                         | <ul style="list-style-type: none"> <li>• Cell surface lectin</li> </ul>                                                                                                                                                                         | <ul style="list-style-type: none"> <li>• Unclear, appears to bind both ramified and amoeboid microglia</li> </ul>                                                              | RCA-1 stains blood vessels, which suggests it is expressed by a variety of cell types. Within the CNS, microglia appear to be the only resident RCA-1+ cells                         |

|                          |                                                       |                                                                                                                           |                                                                                                |
|--------------------------|-------------------------------------------------------|---------------------------------------------------------------------------------------------------------------------------|------------------------------------------------------------------------------------------------|
| TSPO <sup>200, 201</sup> | • Involved in substrate transport to the mitochondria | Expressed by activated microglia, possibly more in M1, though not known to differentiate between M1 and M2 <i>in vivo</i> | Expressed on mitochondria of many cell types, highly expressed by mitochondria and macrophages |
| CD163 <sup>120</sup>     | • Involved in phagocytosis, hemoglobin scavenging     | M2                                                                                                                        | Monocyte lineage cells, including perivascular or infiltrating macrophages                     |

Supplementary Table 1: Cluster of differentiation (CD), Human leukocyte antigen (HLA), Interleukin (IL), Interferon (IFN), Ionized calcium-binding adaptor molecule (Iba), Major histocompatibility complex (MHC), Ricinus communis agglutinin, Tumor necrosis factor (TNF), Triggering receptor expressed on myeloid cells (TREM)

Table 2: CD11b

| First Author         | Brain bank                                                 | n                                                   | Sex                                                         | Age                                                   | AD Genetic Risk Factors | AD Histologically Confirmed and criteria                                    | Braak stage                                         | C history of neurological or psychiatric disease | PMI (h)                                           | Brain Region                                  | Technique | Direction of results                                                                                                      |
|----------------------|------------------------------------------------------------|-----------------------------------------------------|-------------------------------------------------------------|-------------------------------------------------------|-------------------------|-----------------------------------------------------------------------------|-----------------------------------------------------|--------------------------------------------------|---------------------------------------------------|-----------------------------------------------|-----------|---------------------------------------------------------------------------------------------------------------------------|
| Akiyama, 1990        | NR                                                         | AD: 9<br>C: 6                                       | NR                                                          | AD: 77<br>C: 69                                       | NR                      | NR                                                                          | NR                                                  | No neurological disease                          | All within 2-12 h                                 | Temporal lobe                                 | IHC       | ↑, less pronounced increase than HLA-DR                                                                                   |
| Lee, 2016            | OPTIMA and NBTR                                            | AD: 12<br>C: 11                                     | AD: 7/5<br>C: 6/5                                           | AD: 73.1<br>C: 81.1                                   | NR                      | Braak, CERAD                                                                | AD: V-VI<br>C: I-II                                 | NR                                               | AD: 61.2<br>C: 41.5                               | prefrontal (BA9) and temporal (BA22) cortices | PCR       | ↔                                                                                                                         |
| McGeer, 2000         | Pathology Department of the University of British Columbia | NR                                                  | NR                                                          | NR                                                    | NR                      | NR                                                                          | NR                                                  | NR                                               | NR                                                | Hippocampus                                   | PCR       | ↑, less pronounced increase than HLA-DR                                                                                   |
| Sanchez-Mejias, 2016 | Tissue bank at Fundación CIEN                              | Braak stage 0: 8<br>II: 13<br>III-IV: 9<br>V-VI: 18 | Braak stage 0: 5/3<br>II: 7/13<br>III-IV: 4/5<br>V-VI: 7/11 | Braak stage 0: 19<br>II: 78<br>III-IV: 80<br>V-VI: 79 | NR                      | Braak V-VI clinically classified as AD, Braak II age -matched and used as C | Braak stage 0: 8<br>II: 13<br>III-IV: 9<br>V-VI: 17 | NR                                               | Braak stage 0: 8<br>II: 7<br>III-IV: 6<br>V-VI: 8 | Hippocampus CA1, CA3, parahippocampal gyrus   | PCR       | ↔ CD11b, CD33, Iba1, TREM2<br>↑ CD45, CD68 for stages V-VI<br>IHC:<br>↓ area V-VI DG and CA3<br>More activated morphology |

|               |     |                                          |                                                                                       |                                                                                                              |    |     |                  |                                                                  |                                                                                              |                      |     |                                                                                                                |
|---------------|-----|------------------------------------------|---------------------------------------------------------------------------------------|--------------------------------------------------------------------------------------------------------------|----|-----|------------------|------------------------------------------------------------------|----------------------------------------------------------------------------------------------|----------------------|-----|----------------------------------------------------------------------------------------------------------------|
| Shan,<br>2012 | NBB | 7 per<br>Braak<br>stage<br>(49<br>total) | Braak<br>stage:<br>0: 4/3<br>1: 3/4<br>2: 3/4<br>3: 3/4<br>4: 3/4<br>5: 4/3<br>6: 3/4 | Braak<br>stage:<br>0:<br>70.6<br>1:<br>80.3<br>2:<br>76.7<br>3: 85<br>4:<br>82.3<br>5:<br>74.3<br>6:<br>70.3 | NR | Yes | AD: 5-6<br>C 0-1 | No history of<br>neurological and/or<br>psychiatric<br>disorders | Braak<br>stage:<br>0: 6.8<br>I: 6<br>II: 7.3<br>III: 6<br>IV:<br>5.1<br>V: 5.6<br>VI:<br>4.7 | Prefrontal<br>cortex | PCR | ↔ with increasing<br>Braak stage Braak<br>stage V-VI had<br>clinical AD and<br>were compared to<br>stage II Cs |
|---------------|-----|------------------------------------------|---------------------------------------------------------------------------------------|--------------------------------------------------------------------------------------------------------------|----|-----|------------------|------------------------------------------------------------------|----------------------------------------------------------------------------------------------|----------------------|-----|----------------------------------------------------------------------------------------------------------------|

Table 2: Where there are both young and older controls, values are reported for the older (age-matched controls). Results are expressed relative to control unless specified otherwise. Alzheimer's Disease (AD), Brodmann area (BA), Cluster of differentiation (CD), Centro Investigación Enfermedades Neurológicas (CIEN), Consortium to Establish a Registry for Alzheimer's Disease (CERAD), Control (C), Cornu ammonis (CA), Harvard Brain Tissue Resource Center (HBTRC), Human leukocyte antigen (HLA), Hours (h), Netherlands Brain Bank (NBB), Newcastle Brain Tissue Resource (NBTR), Not reported (NR), Oxford Project to Investigate Memory and aging (OPTIMA), Post-mortem interval (PMI), Polymerase chain reaction based assays (PCR), Triggering receptor expressed on myeloid cells 2 (TREM2)

Table 3: CD45

| First Author   | Brain bank                                                        | n               | Sex                   | Age                                                       | AD Genetic Risk Factors                                             | AD Histologically Confirmed and criteria | Braak stage                              | C history of neurological or psychiatric disease          | PMI (h)              | Brain Region      | Technique                  | Direction of results                    |
|----------------|-------------------------------------------------------------------|-----------------|-----------------------|-----------------------------------------------------------|---------------------------------------------------------------------|------------------------------------------|------------------------------------------|-----------------------------------------------------------|----------------------|-------------------|----------------------------|-----------------------------------------|
| Akiyama, 1990  | NR                                                                | AD: 9<br>C: 6   | NR                    | AD: 77<br>C: 69                                           | NR                                                                  | NR                                       | NR                                       | No neurological disease                                   | All within 2-12 h    | Temporal lobe     | IHC                        | ↑, less pronounced increase than HLA-DR |
| Colton, 2006   | KPBBB                                                             | AD: 47<br>C: 29 | AD: 23/24<br>C: 12/17 | AD: 77.8<br>C: 78.3                                       | APOE4:<br>AD: 27<br>C: 5                                            | Braak                                    | AD: IV- V<br>C: I                        | NR                                                        | AD: 6.8<br>C: 9.1    | Frontal lobe      | PCR                        | ↔                                       |
| Magistri, 2015 | BSHRI                                                             | AD: 4<br>C: 4   | AD: 1/4<br>C: 2/2     | AD: 83.75 (not exact, one age just listed >90)<br>C: 83.5 | AD: all APOE3/<br>3 C:<br>APOE2/<br>3: 2<br>APOE3/<br>3: 1<br>NR: 1 | NIA-Reagan Criteria                      | AD:<br>V: 1<br>VI: 3 C:<br>I: 1<br>II: 3 | NR                                                        | AD:<br>2.5 C:<br>2.5 | Hippocampus       | RNA seq (gene expression ) | ↔                                       |
| Licastro, 1998 | Tissue bank of the ADRC at the University of California San Diego | AD: 18<br>C: 4  | AD: 10/8<br>C: 2/2    | AD: 80<br>C: 76                                           | APOE:<br>AD:<br>3/4: 6<br>4/4: 2<br>C: NR                           | CERAD, Khachaturian                      | NR                                       | No history or histopathological features of brain disease | All avg 6            | Midfrontal cortex | IHC                        | ↑ both scattered and clustered cells    |

|                      |                                      |                                                        |                                                                |                                                          |    |                                                                             |                                                        |                                                                 |                                                      |                                             |              |                                                                                                        |
|----------------------|--------------------------------------|--------------------------------------------------------|----------------------------------------------------------------|----------------------------------------------------------|----|-----------------------------------------------------------------------------|--------------------------------------------------------|-----------------------------------------------------------------|------------------------------------------------------|---------------------------------------------|--------------|--------------------------------------------------------------------------------------------------------|
| Masliah, 1991        | ADRC at the University of California | AD: 7<br>C: 5                                          | NR                                                             | AD: 77<br>C: 73                                          | NR | Yes                                                                         | NR                                                     | Clinically and histopathologically free of neurological disease | AD: 5<br>C: 6                                        | Frontal cortex, posterior hippocampus       | IHC, Western | ↑ frontal cortex hippocampus molecular layer and pyramidal layer<br>↔ hippocampus stratus polymorphous |
| Sanchez-Mejias, 2016 | Tissue bank at Fundación CIEN        | Braak stage<br>0: 8<br>II: 13<br>III-IV: 9<br>V-VI: 18 | Braak stage<br>0: 5/3<br>II: 7/13<br>III-IV: 4/5<br>V-VI: 7/11 | Braak stage<br>0: 19<br>II: 78<br>III-IV: 80<br>V-VI: 79 | NR | Braak V-VI clinically classified as AD, Braak II age -matched and used as C | Braak stage<br>0: 8<br>II: 13<br>III-IV: 9<br>V-VI: 17 | NR                                                              | Braak stage<br>0: 8<br>II: 7<br>III-IV: 6<br>V-VI: 8 | Hippocampus CA1, CA3, parahippocampal gyrus | PCR          | ↑ with increasing Braak stage<br>Braak stage V-VI had clinical AD and were compared to stage II Cs     |

Table 3: Where there are both young and older controls, values are reported for the older (age-matched controls). Results are expressed relative to control unless specified otherwise. Alzheimer's Disease (AD), Alzheimer's Disease Research Center (ADRC), Apolipoprotein E (APOE), Average (Avg), Banner Sun Health Research Institute (BSHRI), Centro Investigación Enfermedades Neurológicas (CIEN), Consortium to Establish a Registry for Alzheimer's Disease (CERAD), Control (C), Cornu ammonis (CA), Human leukocyte antigen (HLA), Hours (h), Immunohistochemistry (IHC), Kathleen Price Bryan Brain Bank (KPBBB), National Institute on Aging (NIA), Not reported (NR), Post-mortem interval (PMI), Polymerase chain reaction based assays (PCR), Ribonucleic acid (RNA), Sequencing (Seq)

Table 4: Ferritin

| First Author            | Brain bank                     | n                                                   | Sex                | Age                                                    | AD Genetic Risk Factors | AD Histologically Confirmed and criteria | Braak stage | C history of neurological or psychiatric disease | PMI (h)                            | Brain Region                                                                                                                                   | Technique | Marker     | Direction of results                                                                                                                                                                               |
|-------------------------|--------------------------------|-----------------------------------------------------|--------------------|--------------------------------------------------------|-------------------------|------------------------------------------|-------------|--------------------------------------------------|------------------------------------|------------------------------------------------------------------------------------------------------------------------------------------------|-----------|------------|----------------------------------------------------------------------------------------------------------------------------------------------------------------------------------------------------|
| Kwiatek-Majkusiak, 2015 | Mayo Clinic Florida Brain Bank | AD: 10<br>C: 20                                     | AD:<br>6/4<br>9/11 | AD:<br>75.6<br>C: 72.6                                 | NR                      | Yes                                      | AD:<br>5.3  | No neurodegenerative disorders                   | NR                                 | Hippocampus<br>CA1, CA2,<br>CA4, subiculum                                                                                                     | ELISA     | L-ferritin | ↑                                                                                                                                                                                                  |
| DiPatre, 1997           | NR                             | AD: 9<br>Age-<br>matched<br>Cs: 9<br>Young<br>Cs: 8 | NR                 | AD: 72<br>Age-<br>matched<br>Cs: 73<br>Young<br>Cs: 38 | NR                      | CERAD                                    | NR          | No neuropathological abnormality                 | NR but did not vary between groups | Entorhinal cortex, hippocampus (CA1, CA2, CA3, CA4, DG, subiculum separately)                                                                  | IHC       | Ferritin   | ↑ in all areas                                                                                                                                                                                     |
| Fukumoto, 1996          | NR                             | AD: 10<br>C: 26                                     | NR                 | NR                                                     | NR                      | Khachaturian                             | NR          | NR, Cs had neocortical senile plaques            | NR                                 | Occipital (BA 18), superior frontal (BA 8 or 9) and medial temporal (BA 20, at the level of the entorhinal cortex and hippocampus) neocortices | IHC       | Ferritin   | Plaques associated with microglia:<br>↑ uncored plaques, frontal cortex<br>↓ or ↔ uncored plaques temporal, occipital cortices<br>↓ or ↔ cored plaques in frontal, occipital and temporal cortices |

|                 |              |                                                   |                                                                        |                                                                      |                                                                          |                        |    |                                                                                                                                                    |                                                                |                                                                                                                            |                                     |                                                             |                                                                                                                                              |
|-----------------|--------------|---------------------------------------------------|------------------------------------------------------------------------|----------------------------------------------------------------------|--------------------------------------------------------------------------|------------------------|----|----------------------------------------------------------------------------------------------------------------------------------------------------|----------------------------------------------------------------|----------------------------------------------------------------------------------------------------------------------------|-------------------------------------|-------------------------------------------------------------|----------------------------------------------------------------------------------------------------------------------------------------------|
| Lopes, 2008     | BSHRI        | AD:7<br>Young<br>Cs: 3<br>Aged<br>Cs: 7<br>HPC: 7 | AD:<br>4/3<br>Young<br>Cs:<br>2/1<br>Aged<br>Cs:<br>6/1<br>HPC:<br>5/2 | AD:<br>80.3<br>Young<br>Cs: 36.3<br>Aged<br>Cs: 80.0<br>HPC:<br>83.4 | NR                                                                       | Yes                    | NR | NR                                                                                                                                                 | AD: 2.3<br>Young<br>Cs: 2.8<br>Aged<br>Cs: 2.5<br>HPC:<br>2.90 | Amygdala,<br>hippocampus,<br>superior frontal<br>gyrus, superior,<br>middle, and<br>inferior temporal<br>gyri              | IHC and<br>Morphometric<br>Analyses | Ferritin                                                    | Ferritin: ↔<br>Dystrophic<br>microglia<br>↑ vs all other<br>groups                                                                           |
| Mochizuki, 1996 | NR           | AD: 8<br>HPC: 4                                   | AD:<br>5/3<br>HPC:<br>3/1                                              | AD:<br>79.3<br>HPC:<br>73.3                                          | NR                                                                       | Yes                    | NR | No history of<br>neurological<br>and/or psychiatric<br>disorders or AD<br>symptoms but<br>pathology meets<br>CERAD and<br>Khachaturian<br>criteria | AD: 5.6<br>C: 3.9                                              | Amygdala,<br>entorhinal<br>cortex,<br>hippocampus<br>and frontal,<br>occipital,<br>parietal and<br>temporal<br>neocortices | IHC                                 | Ferritin                                                    | ↑ total microglia<br>↔ in percentage<br>of plaques<br>(diffuse or non-<br>diffuse)<br>associated with<br>microglia<br>(p=0.055 and<br>0.052) |
| Ohgami, 1991    | NR           | AD: 13<br>HPC:<br>23                              | NR                                                                     | AD:<br>59.8<br>HPC:<br>72.7                                          | NR,<br>but all<br>AD<br>cases<br>used<br>were<br>early<br>onset<br>(<65) | Khachaturian           | NR | NR, Cs had senile<br>plaques                                                                                                                       | NR                                                             | Mixed: frontal,<br>insular,<br>occipital,<br>parietal and<br>temporal<br>cortices and<br>parahippocampal<br>gyrus          | IHC                                 | L- ferritin<br>(microglia<br>positive<br>senile<br>plaques) | ↑ microglia<br>associated<br>diffuse plaques<br>↔ microglial<br>associated<br>classical or<br>compact plaques                                |
| Wojtera, 2012   | Not reported | AD:4<br>C: 2                                      | NR                                                                     | NR                                                                   | NR                                                                       | NIA-Reagan<br>Criteria | NR | Not reported                                                                                                                                       | NR                                                             | Mixed:<br>cerebellum,<br>cerebral cortex                                                                                   | IHC                                 | Ferritin                                                    | ↔,<br>↔ between<br>cortex and<br>cerebellum                                                                                                  |

Table 4: Where there are both young and older controls, values are reported for the older (age-matched controls). Results are expressed relative to control unless specified otherwise. Alzheimer's Disease (AD), Apolipoprotein E (APOE), Brodmann area (BA), Consortium to Establish a Registry for Alzheimer's Disease (CERAD), Control (C), Cornu ammonis (CA Dentate gyrus (DG), High pathology control (HPC), Hours (h), Immunohistochemistry (IHC, Not reported (NR), Post-mortem interval (PMI)



Table 5: CD33

| First Author         | Brain bank                                                       | n                                                   | Sex                                                        | Age                                                   | AD Genetic Risk Factors                                                          | AD Histologically Confirmed and criteria                                                | Braak stage                                         | C history of neurological or psychiatric disease | PMI (h)                                           | Brain Region                                | Technique                      | Marker                                           | Direction of results                                                                               |
|----------------------|------------------------------------------------------------------|-----------------------------------------------------|------------------------------------------------------------|-------------------------------------------------------|----------------------------------------------------------------------------------|-----------------------------------------------------------------------------------------|-----------------------------------------------------|--------------------------------------------------|---------------------------------------------------|---------------------------------------------|--------------------------------|--------------------------------------------------|----------------------------------------------------------------------------------------------------|
| Griciuc, 2013        | Massachusetts ADRC                                               | AD: 25<br>C: 15                                     | AD: 7/18<br>C: 6/9                                         | AD: 79.2<br>C: 79.9                                   | APOE carrier: AD: 18 (8 homozygous)<br>C: 5 (0 homozygous)                       | NIA-Reagan Institute Criteria                                                           | NR                                                  | NR                                               | AD: 17<br>C: 29                                   | Frontal cortex                              | IHC (stereology), PCR, Western | CD33                                             | ↑ protein, mRNA, CD33+ microglia                                                                   |
| Malik, 2013          | University of Kentucky AD Center Neuropathology Core             | AD: 28<br>C: 27                                     | AD: 12/16<br>C: 13/14                                      | NR                                                    | CD33 SNPs measures                                                               | Yes                                                                                     | NR                                                  | NR                                               | NR                                                | Superior/middle temporal gyri               | IHC, PCR                       | Ratio CD33 to mean of microglial reference genes | ↑ gene expression, colocalization to amoeboid microglia (non-quantitative)                         |
| Sanchez-Mejias, 2016 | Tissue bank at Fundación CIEN                                    | Braak stage 0: 8<br>II: 13<br>III-IV: 9<br>V-VI: 18 | Braak stage 0: 5/3<br>II: 8/5<br>III-IV: 4/5<br>V-VI: 7/11 | Braak stage 0: 49<br>II: 78<br>III-IV: 80<br>V-VI: 79 | NR                                                                               | Braak Braak V-VI clinically classified as AD, Braak II age -matched and used as control | Braak stage 0: 8<br>II: 13<br>III-IV: 9<br>V-VI: 17 | NR                                               | Braak stage 0: 8<br>II: 7<br>III-IV: 6<br>V-VI: 8 | Hippocampus CA1, CA3, parahippocampal gyrus | PCR                            | CD33                                             | ↔                                                                                                  |
| Walker, 2015         | Arizona Study of Aging and Neurodegenerative Disorders via BSHRI | AD: 97<br>C: 96                                     | AD: 49/48<br>C: 50/46                                      | AD: 82.2<br>C: 84.9                                   | APOE4 excluded<br>Various genotypes of CD33 rs386544 risk allele (C/C, C/A, A/A) | Yes                                                                                     | NR                                                  | NR                                               | For overall sample: AD: 3.6<br>C: 4.0             | Temporal cortex                             | Western blot PCR               | CD33                                             | ↑ RNA<br>↔ Protein<br>- Positive correlation between CD33 and Iba1<br>- Colocalization with HLA-DR |

Table 5: Where there are both young and older controls, values are reported for the older (age-matched controls). Results are expressed relative to control unless specified otherwise. Alzheimer's Disease (AD), Alzheimer's Disease Research Center (ADRC), Apolipoprotein E (APOE), Banner Sun Health Research Institute

(BSHRI), Centro Investigación Enfermedades Neurológicas (CIEN), Cluster of differentiation (CD), Control (C), Cornu ammonis (CA), Hours (h), Human leukocyte antigen (HLA), Ionized calcium-binding adapter molecule 1 (Iba1), Immunohistochemistry (IHC), National Institute on Aging (NIA), Not reported (NR), Post-mortem interval (PMI), Polymerase chain reaction based assays (PCR), Ribonucleic acid (RNA), Single nucleotide polymorphism (SNP)

Table 6: TREM2

| First Author | Brain bank                              | n                                     | Sex                                      | Age                                         | AD Genetic Risk Factors                                                    | AD Histologically Confirmed and criteria | Braak stage                                          | C history of neurological or psychiatric disease                                                                                                                                                                                            | PMI (h) | Brain Region           | Technique    | Marker                            | Direction of results                                                          |
|--------------|-----------------------------------------|---------------------------------------|------------------------------------------|---------------------------------------------|----------------------------------------------------------------------------|------------------------------------------|------------------------------------------------------|---------------------------------------------------------------------------------------------------------------------------------------------------------------------------------------------------------------------------------------------|---------|------------------------|--------------|-----------------------------------|-------------------------------------------------------------------------------|
| Lue, 2015    | BSHRI                                   | AD: 11<br>C: 11<br>Possible<br>AD: 11 | AD: 6/5<br>C: 7/4<br>Possible<br>AD: 3/8 | AD: 82.4<br>C: 85.4<br>Possible<br>AD: 86.5 | APOE 4 Carriers:<br>AD: 5/6<br>C: 1/10<br>Possible<br>AD: 2/9              | Braak, CERAD                             | AD: Avg 5.2<br>C: Avg 2.8<br>Possible<br>AD: Avg 2.9 | NR                                                                                                                                                                                                                                          | NR      | Middle temporal cortex | IHC, Western | Iba1<br>TREM 2<br>DAP12 (TYRO BP) | Western: ↑<br>TREM2 and DAP12 than C and HPC<br>IHCs: ↑<br>intensity of TREM2 |
| Ma, 2016     | Brain Bank at Mayo Clinic, Jacksonville | AD: 33<br>C: 33                       | AD: 16/17<br>C: 15/18                    | AD: 72.7<br>C: 70.7                         | No risk alleles for APP, PSEN or TREM2<br>APOE4:<br>AD: 16/17<br>C: 15/ 18 | Braak                                    | AD: >IV<br>C: <3                                     | Most had pathology unrelated to AD: cerebrovascular, frontotemporal dementia, Lewy body disease, corticobasal degeneration, argyrophilic grain disease, multi-system atrophy, amyotrophic lateral sclerosis, progressive supranuclear palsy | NR      | Temporal cortex        | PCR, Western | Iba1<br>TREM 2                    | ↑ TREM2 normalized to Iba1                                                    |

|                      |                                                                 |                                                           |                                                                |                                                          |                                                                             |                                                                             |                                                        |    |                                                      |                                             |              |                   |                                                                                                                                                                                                        |
|----------------------|-----------------------------------------------------------------|-----------------------------------------------------------|----------------------------------------------------------------|----------------------------------------------------------|-----------------------------------------------------------------------------|-----------------------------------------------------------------------------|--------------------------------------------------------|----|------------------------------------------------------|---------------------------------------------|--------------|-------------------|--------------------------------------------------------------------------------------------------------------------------------------------------------------------------------------------------------|
| Roussos, 2014        | Icahn School of Medicine at Mount Sinai and the ADRC Brain Bank | AD (genotype differences):<br>C/C: 16<br>C/T: 16<br>C: 16 | AD:<br>C/C: 5/11<br>C/T: 5/11<br>C: 5/11                       | AD:<br>C/C: 83.0<br>C/T: 82.3<br>C: 82.6                 | APOE 4 and R47H variant of TREM2 significantly more common in cases than Cs | Braak, CERAD                                                                | NR                                                     | NR | AD:<br>C/C: 14.5<br>C/T: 13.9<br>C: 13.3             | Superior temporal gyrus                     | PCR, Western | TREM 2<br>TYRO BP | Gene expression:<br>↑ TREM2 and TYROBP in AD R47H carriers<br>↔ in AD non carriers<br>Protein levels:<br>↓ TREM2 in AD R47H carriers<br>↔ AD non carriers<br>↑ TYROBP in non-carriers<br>↔ in carriers |
| Sanchez-Mejias, 2016 | Tissue bank at Fundación CIEN                                   | Braak stage<br>0: 8<br>II: 13<br>III-IV: 9<br>V-VI: 18    | Braak stage<br>0: 5/3<br>II: 7/13<br>III-IV: 4/5<br>V-VI: 7/11 | Braak stage<br>0: 19<br>II: 78<br>III-IV: 80<br>V-VI: 79 | NR                                                                          | Braak V-VI clinically classified as AD, Braak II age -matched and used as C | Braak stage<br>0: 8<br>II: 13<br>III-IV: 9<br>V-VI: 17 | NR | Braak stage<br>0: 8<br>II: 7<br>III-IV: 6<br>V-VI: 8 | Hippocampus CA1, CA3, parahippocampal gyrus | PCR          | TREM 2            | ↔ stage V-VI vs II<br>Braak stage V-VI had clinical AD and were compared to stage II Cs                                                                                                                |

Table 6: Where there are both young and older controls, values are reported for the older (age-matched controls). Results are expressed relative to control unless specified otherwise. Alzheimer's Disease (AD), Alzheimer's Disease Research Center (ADRC), Amyloid precursor protein (APP), Apolipoprotein E (APOE), Average (Avg), Banner Sun Health Research Institute (BSHRI), Centro Investigación Enfermedades Neurológicas (CIEN), Consortium to Establish a Registry for Alzheimer's Disease (CERAD), Control (C), Cornu ammonis (CA), DNAX-activation protein 12 (DAP12), High pathology control (HPC), Hours (h), Ionized calcium-binding adapter molecule 1 (Iba1), Immunohistochemistry (IHC), Not reported (NR), Post-mortem interval (PMI), Presenilin (PSEN), Polymerase chain reaction based assays (PCR), Triggering receptor expressed on myeloid cells 2 (TREM2), TYRO protein tyrosine kinase binding protein (TYROBP)

Table 7: CD11c

| First author  | Brain bank                   | n                                  | Sex                   | Age                                    | AD Genetic Risk Factors | AD Histologically Confirmed | Braak stage | C history of neurological or psychiatric disease | PMI (h) | Brain Region                                                                                                           | Technique | Marker         | Direction of results                               |
|---------------|------------------------------|------------------------------------|-----------------------|----------------------------------------|-------------------------|-----------------------------|-------------|--------------------------------------------------|---------|------------------------------------------------------------------------------------------------------------------------|-----------|----------------|----------------------------------------------------|
| Akiyama, 1990 | NR                           | AD: 9<br>C: 6                      | AD:<br>77<br>C:<br>69 | NR                                     | NR                      | NR                          | NR          | No neurological disease                          | 2-12    | Temporal lobe                                                                                                          | IHC       | CD11c (Leu-M5) | ↑ most pronounced difference for HLA-DR            |
| Itoh, 1998    | Yokufukai Geriatric Hospital | AD: 20<br>C: 20<br>Centenarian: 13 | NR                    | AD: 80.9 C: 79.8<br>Centenarian: 101.5 | NR                      | CERAD                       | NR          | Other neurological diseases excluded             | NR      | Hippocampus (CA1 and subiculum), superior temporal gyrus                                                               | IHC       | CD11c (Ki-M1P) | ↑                                                  |
| Paulus, 1993  | NR                           | AD: 6<br>C: 6                      | NR                    | AD: 79.7 C: 67.9                       | NR                      | CERAD, Khachaturian         | NR          | No neurological or neuropathological disorder    | 8-48    | CA1 sector of the hippocampus, granular layer of the DG, fourth/fifth frontal neocortical layers, frontal white matter | IHC       | CD11c (Ki-M1P) | ↑ Frontal cortex<br>↔ White matter and hippocampus |

|                 |    |               |    |                     |    |    |    |    |    |    |                                                             |     |                       |   |
|-----------------|----|---------------|----|---------------------|----|----|----|----|----|----|-------------------------------------------------------------|-----|-----------------------|---|
| Yamada,<br>2001 | NR | AD: 5<br>C: 5 | NR | AD: 92.8 C:<br>93.4 | NR | NR | NR | NR | NR | NR | Entorhinal<br>cortex,<br>hippocampus<br>(CA1,<br>subiculum) | IHC | CD11c<br>(Ki-<br>M1P) | ↑ |
|-----------------|----|---------------|----|---------------------|----|----|----|----|----|----|-------------------------------------------------------------|-----|-----------------------|---|

Table 7: Where there are both young and older controls, values are reported for the older (age-matched controls). Results are expressed relative to control unless specified otherwise. Alzheimer's Disease (AD), Cluster of differentiation (CD), Consortium to Establish a Registry for Alzheimer's Disease (CERAD), Control (C), Cornu ammonis (CA), Dentate gyrus (DG), Human leukocyte antigen (HLA), Hours (h), Immunohistochemistry (IHC), Not reported (NR), Post-mortem interval (PMI), Polymerase chain reaction based assays (PCR)

Table 8: IL-1 $\alpha$  expressing microglia

| First Author | Brain bank | n              | Sex               | Age                   | AD Genetic Risk Factors | AD Histologically Confirmed and criteria | Braak stage | C history of neurological or psychiatric disease             | PMI (h)             | Brain Region                                                         | Technique | Marker                             | Direction of results                                                                                                                                                                                                                                                           |
|--------------|------------|----------------|-------------------|-----------------------|-------------------------|------------------------------------------|-------------|--------------------------------------------------------------|---------------------|----------------------------------------------------------------------|-----------|------------------------------------|--------------------------------------------------------------------------------------------------------------------------------------------------------------------------------------------------------------------------------------------------------------------------------|
| Sheng, 2001  | NR         | AD: 12<br>C: 9 | AD: 4/8<br>C: 7/2 | AD: 63-92<br>C: 50-93 | NR                      | CERAD                                    | NR          | No evidence of neurological or psychiatric disease           | AD: 2-13<br>C: 1-15 | Parahippocampal cortex                                               | IHC, PCR  | IL-1 $\alpha$ expressing microglia | ↑ IL-1 $\alpha$ positive microglia (activated morphology)                                                                                                                                                                                                                      |
| Sheng, 1998  | NR         | AD:9<br>C: 4   | AD: 8/1<br>C: 4/0 | AD:65-88<br>C: 61-83  | NR                      | CERAD                                    | NR          | No clinical or pathological evidence of neurological disease | AD: 10<br>C: 5      | Temporal lobe                                                        | IHC       | IL-1 $\alpha$ expressing microglia | ↑ in cortical layers III-VI<br>↔ in cortical layers I-II<br>- IL-1- $\alpha$ + microglia appeared enlarged and highly immunoreactive in AD but smaller and less immunoreactive in C<br>- In AD brains, IL1- $\alpha$ + microglia distribution correlated with neuritic plaques |
| Sheng, 1995  | NR         | AD: 8<br>C: 6  | AD: 6/2<br>C: 5/1 | AD: 76.1<br>C: 63.5   | NR                      | CERAD                                    | NR          | No evidence of neurological disease, two had schizophrenia   | AD: 9.3<br>C: 5.5   | Cerebellum, hippocampus, frontal lobe, occipital lobe, temporal lobe | IHC       | IL-1 $\alpha$ expressing microglia | ↑ Hippocampus, frontal, occipital, temporal, lobes<br>↔ cerebellum                                                                                                                                                                                                             |

Table 8: Where there are both young and older controls, values are reported for the older (age-matched controls). Results are expressed relative to control unless specified otherwise. Alzheimer's Disease (AD), Consortium to Establish a Registry for Alzheimer's Disease (CERAD), Control (C), Hours (h), immunohistochemistry (IHC), Interleukin (IL), Not reported (NR), Post-mortem interval (PMI), Polymerase chain reaction based assays (PCR)

Table 9: RCA-1

| First Author    | Brain bank                                                                                                                | n                                                               | Sex                | Age                                                                   | AD Genetic Risk Factors | AD Histologically Confirmed and criteria | Braak stage                   | C history of neurological or psychiatric disease                                            | PMI (h) | Brain Region                                                   | Technique | Microglia Marker | Direction of results                                                              |
|-----------------|---------------------------------------------------------------------------------------------------------------------------|-----------------------------------------------------------------|--------------------|-----------------------------------------------------------------------|-------------------------|------------------------------------------|-------------------------------|---------------------------------------------------------------------------------------------|---------|----------------------------------------------------------------|-----------|------------------|-----------------------------------------------------------------------------------|
| Mackenzie, 1995 | University Hospital, London, Canada                                                                                       | AD: 11<br>C (no sp): 14<br>C (dp only): 12<br>C (dp and np): 14 | NR                 | AD: 76.7, C (no sp): 75.1<br>C (dp only): 74.3<br>C (dp and np): 74.1 | NR                      | Yes                                      | NR                            | No history of neurologic disease or systemic condition that could affect microglial numbers | NR      | Anteromesial temporal lobe                                     | IHC       | RCA-1            | ↑ in AD than all C groups<br>↑ in C groups with NP than with diffuse or no plaque |
| Sheffield, 2000 | AD: University of Iowa Alzheimer's Disease Research Center<br>C: University of Kansas Medical Center Willard Body Program | AD: 12<br>C: 4                                                  | AD: 6/6,<br>C: 2/2 | AD: 79.4<br>C: 77.8                                                   | NR                      | Khachaturian                             | AD: all IV<br>C: 0: 3<br>I: 1 | No history of neurological disease                                                          | NR      | Association cortex, periallocortex/ allocortex, primary cortex | IHC       | RCA-1            | ↑                                                                                 |

Table 9: Where there are both young and older controls, values are reported for the older (age-matched controls). Results are expressed relative to control unless specified otherwise. Alzheimer's Disease (AD), Control (C), Diffuse plaque (dp), Hours (h), Immunohistochemistry (IHC), Not reported (NR), Post-mortem interval (PMI), Ricinus communis agglutinin-1 (RCA-1), Senile plaque (sp)



Table 10: TSPO

| First Author  | Brain bank                                      | n               | Sex                 | Age                 | AD Genetic Risk Factors                    | AD Histologically Confirmed and criteria | Braak stage                                                      | C history of neurological or psychiatric disease | PMI (h)             | Brain Region                                        | Technique            | Marker          | Direction of results                                                                             |
|---------------|-------------------------------------------------|-----------------|---------------------|---------------------|--------------------------------------------|------------------------------------------|------------------------------------------------------------------|--------------------------------------------------|---------------------|-----------------------------------------------------|----------------------|-----------------|--------------------------------------------------------------------------------------------------|
| Marutle, 2013 | Brain Bank at Karolinska Institutet and the NBB | AD: 11<br>C: 13 | NR                  | AD: 75.2<br>C: 73.9 | NR                                         | CERAD, NINCDS-ADRDA                      | AD: 5-6<br>C: 1-2                                                | NR                                               | AD: 15.9<br>C: 18.5 | Frontal Cortex, hippocampus                         | Binding assay        | PK11195         | ↑Frontal cortex<br>↔Hippocampus                                                                  |
| Kravitz, 2013 | NBB                                             | AD: 23<br>C: 17 | AD: 11/12<br>C: 9/8 | AD: 79.7<br>C: 79.7 | APOE AD: 3/4: 12<br>C: 4/4: 3<br>C: 3/4: 1 | Braak                                    | AD: IV: 3<br>V: 17<br>VI: 3<br>C: 0: 5<br>I: 7<br>II: 4<br>ND: 1 | NR                                               | A: 5.7<br>C: 8.7    | Entorhinal cortex, hippocampus, subiculum, striatum | Autoradiography, PCR | PK11195<br>TSPO | Autoradiography:<br>↑ PK11195 in all regions<br>PCR:<br>↑ TSPO in hippocampus<br>↔ TSPO striatum |

Table 10: Where there are both young and older controls, values are reported for the older (age-matched controls). Results are expressed relative to control unless specified otherwise. Alzheimer’s Disease (AD), Apolipoprotein E (APOE), Consortium to Establish a Registry for Alzheimer’s Disease (CERAD), Control (C), Hours (h), National Institute of Neurological and Communicative Disorders and Stroke and the Alzheimer's Disease and Related Disorders Association (NINCDS-ADRDA), Netherlands Brain Bank (NBB), Not reported (NR), Post-mortem interval (PMI), Polymerase chain reaction based assays (PCR), Translocator protein (TSPO)

Table 11: CD163

| First Author     | Brain bank                    | n               | Sex                 | Age             | AD Genetic Risk Factors | AD Histologically Confirmed and criteria     | Braak stage                | C history of neurological or psychiatric disease | PMI (h) | Brain Region                                                                                      | Technique           | Direction of results |
|------------------|-------------------------------|-----------------|---------------------|-----------------|-------------------------|----------------------------------------------|----------------------------|--------------------------------------------------|---------|---------------------------------------------------------------------------------------------------|---------------------|----------------------|
| Dal Bianco, 2008 | NR                            | AD: 9<br>C: 15  | AD: 0/9<br>C: 13/2  | AD: 81<br>C: 70 | NR                      | Braak, CERAD                                 | AD: IV: 2<br>V: 4<br>VI: 3 | No neurological disease or brain lesions         | NR      | Cortical areas of the temporal lobe, including entorhinal cortex, hippocampus and temporal cortex | Immunocytochemistry | ↑                    |
| Pey, 2014        | Corsellis Archival Collection | AD: 31<br>C: 16 | AD: 21/10<br>C: 8/8 | AD: 76<br>C: 70 | NR                      | Braak, BrainNet Europe Consortium Guidelines | AD: V and VI               | No neurological causes of death                  | NR      | Hippocampus, frontal cortex, occipital cortex                                                     | IHC                 | ↑                    |

Table 11: Where there are both young and older controls, values are reported for the older (age-matched controls). Results are expressed relative to control unless specified otherwise. Alzheimer's Disease (AD), Consortium to Establish a Registry for Alzheimer's Disease (CERAD), Cluster of differentiation (CD), Control (C), Hours (h), Immunohistochemistry (IHC), Not reported (NR), Post-mortem interval (PMI)

Table 12: Microglia identified based on morphology

| First Author | Brain bank                                                                                                                      | n               | Sex                       | Age                       | AD Genetic Risk Factors | AD Histologically Confirmed | Braak stage | C history of neurological or psychiatric disease           | PMI (h) | Brain Region                                                                                                                                | Technique                         | Marker                   | Direction of results                                                         |
|--------------|---------------------------------------------------------------------------------------------------------------------------------|-----------------|---------------------------|---------------------------|-------------------------|-----------------------------|-------------|------------------------------------------------------------|---------|---------------------------------------------------------------------------------------------------------------------------------------------|-----------------------------------|--------------------------|------------------------------------------------------------------------------|
| Pelvig, 2003 | Nederlandse Hersenbank, Holland, Johns Hopkins University Hospital, Baltimore, USA and from departments of pathology in Denmark | AD: 14<br>C: 20 | AD:<br>4/10<br>C:<br>6/14 | AD:<br>81.1<br>C:<br>80.5 | NR                      | Yes                         | NR          | NR - non-neurological causes of death                      | NR      | Mixed: cingulate gyrus, hippocampus, insula, frontal, medial, occipital, parietal and temporal lobes, and one or two tiers of mesencephalon | Stereology, Cavalieri's principle | Identified by morphology | ↔ mean total number of glial cells in neocortex                              |
| Shefer, 1977 | NR                                                                                                                              | AD: 6<br>C: NR  | NR                        | AD:<br>67<br>C:77         | NR                      | NR                          | NR          | Neurological illness not examined, psychologically healthy | NR      | Subiculum of the archicortex in the hippocampal fissure                                                                                     | Nissl                             | Identified by morphology | ↑ relative number of microglia per volume and absolute number of glial cells |

Table 12: Where there are both young and older controls, values are reported for the older (age-matched controls). Alzheimer's Disease (AD), Control (C), Hours (h), Not reported (NR)

Table 13: Other markers

| First Author     | Brain bank                      | n              | Sex                | Age                 | AD Genetic Risk Factors | AD Histologically Confirmed | Braak stage                | C history of neurological or psychiatric disease | PMI (h)           | Brain Region                                                                                      | Technique           | Marker                                             | Direction of results                                                                                                                            |
|------------------|---------------------------------|----------------|--------------------|---------------------|-------------------------|-----------------------------|----------------------------|--------------------------------------------------|-------------------|---------------------------------------------------------------------------------------------------|---------------------|----------------------------------------------------|-------------------------------------------------------------------------------------------------------------------------------------------------|
| Akiyama, 1990    | NR                              | AD: 9<br>C: 6  | NR                 | AD: 77<br>C: 69     | NR                      | NR                          | NR                         | No neurological disease                          | All within 2-12 h | Temporal lobe                                                                                     | IHC                 | CD11a, CD64, CD18                                  | ↑ most pronounced difference for HLA-DR                                                                                                         |
| Cimino, 2009     | University of Washington's ADRC | AD:6<br>C: 6   | AD: 2/4<br>C: 2/4  | AD: 76.0<br>C: 77.2 | NR                      | NR                          | NR                         | NR                                               | All <8 h          | Frontal cortex and Hippocampus                                                                    | IHC                 | DOCK2 (Co-localized with RCA-1)                    | ↑ DOCK2+ cells in both frontal cortex and hippocampus<br>↑ DOCK2+ and RCA1+ co-labelled cells in both frontal cortex and hippocampus            |
| Dal Bianco, 2008 | NR                              | AD: 9<br>C: 15 | AD: 0/9<br>C: 13/2 | AD: 81<br>C: 70     | NR                      | Braak, CERAD                | AD: IV: 2<br>V: 4<br>VI: 3 | No neurological disease or brain lesions         | NR                | Cortical areas of the temporal lobe, including entorhinal cortex, hippocampus and temporal cortex | Immunocytochemistry | B2M, GLUT, HC-10, HMGB, iNOS, MHCII, Siglec        | ↔ B2M<br>↑ HC-10 near plaque only<br>↑ Siglec near plaque only<br>↑ iNOS near plaque only<br>↑ HMGB near plaque only<br>↑ GLUT near plaque only |
| Dhawan, 2012     | University of Washington ADRC   | NR             | NR                 | NR - "age matched"  | NR                      | NR                          | NR                         | NR                                               | NR                | Temporal lobe                                                                                     | IHC                 | Protein phosphotyrosine (Co-localized with MHC-II) | ↑ microglia with phosphotyrosine and enzymes involved in tyrosine                                                                               |

|                       |                                                   |               |                   |                     |                                                 |              |                       |                       |                     |                                                                                                        |                                      |                                                               |                                                                 |
|-----------------------|---------------------------------------------------|---------------|-------------------|---------------------|-------------------------------------------------|--------------|-----------------------|-----------------------|---------------------|--------------------------------------------------------------------------------------------------------|--------------------------------------|---------------------------------------------------------------|-----------------------------------------------------------------|
|                       |                                                   |               |                   |                     |                                                 |              |                       |                       |                     |                                                                                                        |                                      |                                                               | phosphorylation                                                 |
| Green, 2004           | ADRC Brain Bank at Massachusetts General Hospital | NR            | NR                | AD: 73<br>C: 68     | NR                                              | CERAD        | NR                    | NR                    | AD: 12.0<br>C: 12.2 | Mixed: frontal, parietal and temporal cortices                                                         | Peroxidase activity, IHC, immunoblot | Myeloperoxidase (Colocalized with HLA-DR)                     | ↑ MPO reactivity in AD microglia                                |
| Kawaguchi-Niida, 2006 | NR                                                | AD:5<br>C:5   | AD: 3/2<br>C: 2/3 | AD: 81.4<br>C: 75.8 | NR                                              | Yes          | NR                    | NR                    | NR                  | Parahippocampal gyrus, subiculum, CA1 to CA4 segments of Sommer's Sector, DG and adjacent white matter | IHC                                  | Protein bound carbonyl crotonaldehyde (Co-stained for GLUT-5) | ↑ protein bound carbonyl crotonaldehyde positive microglia      |
| Lue, 2001             | BSHRI                                             | AD:11<br>C:10 | AD: 5/6<br>C: 4/6 | AD:80.8<br>C: 80.5  | APOE:<br>AD: 3/4: 4<br>4/4: 4<br>C: 3<br>4/4: 1 | Braak, CERAD | AD: IV-VI<br>C: I-III | NR                    | AD: 2.6<br>C: 2.3   | Hippocampus                                                                                            | IHC                                  | RAGE (Colocalized with HLA-DR)                                | ↑ RAGE+ microglia in hippocampus (dentate gyrus, CA, subiculum) |
| Matsuo, 1996          | NR                                                | AD: 8<br>C: 5 | NR                | NR                  | NR                                              | Yes          | NR                    | Neurologically normal | All 2-24            | Angular, entorhinal, hippocampus, occipitotemporal temporal cortices                                   | IHC                                  | CD43 (mainly stains microglia, decreases with activation)     | ↓                                                               |

|                     |                                                                                                           |                  |                       |                     |                                                                 |       |                        |                                    |                 |                            |         |       |                                                                                                       |
|---------------------|-----------------------------------------------------------------------------------------------------------|------------------|-----------------------|---------------------|-----------------------------------------------------------------|-------|------------------------|------------------------------------|-----------------|----------------------------|---------|-------|-------------------------------------------------------------------------------------------------------|
| Minett, 2016        | Medical Research Council Cognitive Function and Ageing Study - six centres in UK                          | AD: 83<br>C: 130 | AD: 64/53<br>C: 51/66 | AD: 89<br>C: 84     | NR                                                              | CERAD | NR                     | NR                                 | NR              | Middle frontal gyrus (BA9) | IHC     | MSR-A | ↑ MSR-A -Associated negatively with cognition (MMSE), positively with AD pathology (plaques, tangles) |
| Pujol-Gimenez, 2014 | Oxford Projectto Investigate Memory and Ageing and the HumanBrain Tissue Biobank "Biobanco Navarrabiomed" | AD: 12<br>C: 12  | AD: 5/7<br>C: 4/8     | AD: 81<br>C: 75     | NR                                                              | CERAD | AD: V or VI<br>C: 0-II | No history of neurological disease | AD: 49<br>C: 39 | Frontal cortex (BA 10)     | Western | OX-42 | ↑                                                                                                     |
| Rangaraju, 2015     | Emory ADRC Neuropathology Core, Atlanta                                                                   | AD: 10<br>C: 10  | AD: 6/4<br>C: 6/4     | AD: 71.5<br>C: 71.5 | APOE: AD: 8 with APOE4 (3 homozygous) C: 1 APOE4 (0 homozygous) | Yes   | AD: All VI<br>C: 0     | NR                                 | NR              | Frontal cortex             | IHC     | Kv1.3 | ↑ Kv1.3                                                                                               |

|                      |                                                                                                |                                                     |                                                             |                                                       |    |                                                                              |                                                     |                                                              |                                                   |                                             |                   |                                                           |                                                                                                                                                                       |
|----------------------|------------------------------------------------------------------------------------------------|-----------------------------------------------------|-------------------------------------------------------------|-------------------------------------------------------|----|------------------------------------------------------------------------------|-----------------------------------------------------|--------------------------------------------------------------|---------------------------------------------------|---------------------------------------------|-------------------|-----------------------------------------------------------|-----------------------------------------------------------------------------------------------------------------------------------------------------------------------|
| Ricciarelli, 2004    | Institute of Pathology, Case Western Reserve University and ADRC at the University of Kentucky | AD: 6<br>C: 6<br>HPC: 6                             | NR                                                          | AD: 85<br>C: 65<br>HPCs: 74                           | NR | CERAD                                                                        | NR                                                  | No history of neurological disorder                          | AD: 7<br>C: 9 C with Plaques: <3                  | Frontal Cortex                              | PCR, Immunoblot   | CD36                                                      | ↑ vs C, ↔ vs HPC                                                                                                                                                      |
| Sanchez-Mejias, 2016 | Tissue bank at Fundación CIEN                                                                  | Braak stage 0: 8<br>II: 13<br>III-IV: 9<br>V-VI: 17 | Braak stage 0: 5/3<br>II: 7/13<br>III-IV: 4/5<br>V-VI: 7/11 | Braak stage 0: 19<br>II: 78<br>III-IV: 80<br>V-VI: 79 | NR | Braak V-VI clinically classified as AD, Braak II age - matched and used as C | Braak stage 0: 8<br>II: 13<br>III-IV: 9<br>V-VI: 17 | NR                                                           | Braak stage 0: 8<br>II: 7<br>III-IV: 6<br>V-VI: 8 | Hippocampus CA1, CA3, parahippocampal gyrus | IHC               | P2ry12                                                    | ↓ area in stage V-VI DG and CA3<br>↔ CA1 and parahippocampal gyrus<br>- More activated morphology<br>- Braak stage V-VI had AD and were compared to Braak stage II Cs |
| Satoh, 2015          | NR                                                                                             | AD: 7<br>C: 14                                      | AD: 5/5<br>C: 6/5                                           | AD: 70<br>C: 75                                       | NR | Braak, CERAD                                                                 | AD: VI: 10                                          | 4 died of non-neurological causes, 3 with Parkinson's, 4 ALS | NR                                                | Frontal cortex                              | IHC, PCR, Western | Transmembrane protein (TMEM) 119 (Co-localised with Iba1) | PCR: ↑<br>IHC: ↔<br>Western: ↔                                                                                                                                        |

|                  |       |                              |                  |                                                        |    |       |    |    |                                                      |                                                                                                                                                 |                                                                                                  |                                   |                                                                    |
|------------------|-------|------------------------------|------------------|--------------------------------------------------------|----|-------|----|----|------------------------------------------------------|-------------------------------------------------------------------------------------------------------------------------------------------------|--------------------------------------------------------------------------------------------------|-----------------------------------|--------------------------------------------------------------------|
| Strohmeier, 2014 | BSHRI | NR                           | NR               | NR                                                     | NR | Yes   | NR | NR | All <4 h                                             | Limbic cortex and neocortex (locus ceruleus, mid-frontal gyrus, superior frontal gyrus, superior parietal lobule, temporal lobe, visual cortex) | IHC                                                                                              | C/EBPb (Co-localized with HLA-DR) | ↑                                                                  |
| Verbeek, 1995    | NR    | AD: 41 C: 13                 | AD: 14/24 C: 5/8 | AD: 78.0 C: 71.5                                       | NR | Yes   | NR | NR | AD: 2.1 C: 3.2                                       | Grey matter of: cerebellum, frontal cortex, hippocampus, and parietal, occipital and temporal cortices                                          | IHC                                                                                              | 25F9 (activated microglia)        | ↑ Activated microglia                                              |
| Walker, 2002     | BSHRI | AD: 6-9/region C: 5-9/region | Varies by region | Varies by region, for overall sample: AD: 81.9 C: 79.8 | NR | CERAD | NR | NR | Varies by region, for overall sample: AD: 2.6 C: 2.4 | Cerebellum, hippocampus, inferior and superior temporal gyri                                                                                    | microglia isolation (qualitative), immunoblot (quantitative), immunohistochemistry (qualitative) | CD87                              | ↑ hippocampus, superior and inferior temporal gyri<br>↔ cerebellum |

Table 13: Where there are both young and older controls, values are reported for the older (age-matched controls). Results are expressed relative to control unless specified otherwise. Alzheimer's Disease (AD), Arginase 1 (AG1), Alzheimer's Disease Research Center (ADRC), Apolipoprotein E (APOE), Banner Sun Health Research Institute (BSHRI), Brodmann area (BA), Cationic amino acid transporter member 2 (CAT2), Cluster of differentiation (CD), Centro Investigación Enfermedades Neurológicas (CIEN), Chitinase 3-like (CHI3L), Consortium to Establish a Registry for Alzheimer's Disease (CERAD), Control (C), Cornu ammonis (CA), Dedicator of cytokinesis 2 (DOCK-2), Dentate gyrus (DG), Glucose transporter (GLUT), High mobility group box 1 (HMGB1), High pathology control (HPC), Human leukocyte antigen (HLA), Hours (h), Ionized calcium-binding adapter molecule 1 (Iba1), Immunohistochemistry (IHC), inducible nitric oxide synthase (iNOS), Kathleen Price Bryan Brain Bank (KPBBB), Macrophage scavenger receptor A (MSR-A), Mannose receptor (MRc), Major histocompatibility complex (MHC), Mini-mental state exam (MMSE), Myeloperoxidase (MPO), Not reported (NR), Post-mortem interval (PMI), Polymerase chain reaction based assays (PCR), Receptor for advanced glycation endproducts (RAGE), Ricinus communis agglutinin-1 (RCA-1), Sialic acid-binding immunoglobulin-type lectins (Siglec)



Table 14: High throughput studies

| First Author       | Brain bank                                                                                                                                                                                                                                                                                          | n               | Sex (m/f)             | Age                 | AD Genetic Risk Factors        | AD Histologically Confirmed and criteria | Braak stage                                                                                     | C history of neurological or psychiatric disease                                                  | PMI (h)           | Brain Region                                                               | Technique                         | Marker                                                                                                | Direction of results (AD vs C)                                                                                                                                                                                                                                                                                                                                                                       |
|--------------------|-----------------------------------------------------------------------------------------------------------------------------------------------------------------------------------------------------------------------------------------------------------------------------------------------------|-----------------|-----------------------|---------------------|--------------------------------|------------------------------------------|-------------------------------------------------------------------------------------------------|---------------------------------------------------------------------------------------------------|-------------------|----------------------------------------------------------------------------|-----------------------------------|-------------------------------------------------------------------------------------------------------|------------------------------------------------------------------------------------------------------------------------------------------------------------------------------------------------------------------------------------------------------------------------------------------------------------------------------------------------------------------------------------------------------|
| Cribbs, 2012       | National Institute on Aging Alzheimer's Disease Center brain banks located at the University of California, Irvine, Sun Health Research Institute, University of Rochester, Johns Hopkins University, University of Maryland, University of Pennsylvania, and the University of Southern California | AD: 26<br>C: 33 | AD: 11/15<br>C: 14/19 | AD: 85.7<br>C: 84.2 | APOE4 Carriers: AD: 17<br>C: 4 | CERAD, NIA-Reagan Criteria               | AD: I: 1<br>II: 1,<br>III: 3<br>IV: 6<br>VI: 12<br>C: 0: 5<br>I: 2<br>II: 12<br>III: 6<br>IV: 3 | No history of neurological and/or psychiatric disorders, no major neuropathological abnormalities | AD: 4.4<br>C: 4.0 | Entorhinal cortex, hippocampus, post-central gyrus, superior frontal gyrus | Microarray, small subset with PCR | Markers of microglial activation (Fc receptors, MHC, TLR)                                             | ↔ For most genes relative to age-matched Cs: all measured MHC I genes, HLA-DPβ1, HLA-DQα1, HLA-DQβ1, HLA-DRβ1,3,4 and 6, all measured Fc fragment genes, CD163, CD14, TLR 10, TLR2, TLR4, TLR8<br>↑ HLA-DMα, HLA-DMβ, HLA-DPα, HLA-DRα, HLA-DRβ5 (SFG), TLR 5 (HC and SFG), TLR7 (SFG, not confirmed by PCR), CD32 (SFG)<br>↓ Toll interacting protein (HC)<br>↑ for most genes relative to young Cs |
| Durrenberger, 2015 | Institute of Neuropathology in Barcelona and Human Brain Tissue Bank in Budapest                                                                                                                                                                                                                    | AD: 12<br>C: 6  | AD: 7/5<br>C: 3/3     | AD: 81.3<br>C: 60.3 | NR                             | Yes, Braak                               | AD: IV-V<br>C: <II                                                                              | No neurodegenerative disorder, systemic illness or alcohol or drug abuse                          | AD: 6.0<br>C: 8.7 | Entorhinal cortex                                                          | Microarray, PCR validation*       | HLA-DRA*, HLA-DPA, HLA-DRB4*, TREM2, TYROBP*, CD74, CPVL, GRAMD1 C, annexin A1, RFX4, CD37 and TYROBP | ↑                                                                                                                                                                                                                                                                                                                                                                                                    |

|                            |                                                                                                                                         |                                                                                   |                                                                    |                                                              |                                                                                                                                                                    |                 |                                                                                                                                                       |    |               |                                                                                                     |                                                      |                                                                                    |                                      |   |
|----------------------------|-----------------------------------------------------------------------------------------------------------------------------------------|-----------------------------------------------------------------------------------|--------------------------------------------------------------------|--------------------------------------------------------------|--------------------------------------------------------------------------------------------------------------------------------------------------------------------|-----------------|-------------------------------------------------------------------------------------------------------------------------------------------------------|----|---------------|-----------------------------------------------------------------------------------------------------|------------------------------------------------------|------------------------------------------------------------------------------------|--------------------------------------|---|
| Li, 2015                   | NR                                                                                                                                      | AD:<br>450<br>C: 212                                                              | NR                                                                 | NR                                                           | NR                                                                                                                                                                 | NR              | NR                                                                                                                                                    | NR | NR            | NR                                                                                                  | Super<br>frontal<br>gyrus or<br>prefrontal<br>cortex | Meta-<br>analysis of<br>six gene<br>expression<br>studies                          | Dok-3<br>(links with<br>TYROBP)      | ↑ |
| Podtelez<br>nikov,<br>2011 | HBTRC                                                                                                                                   | Varies<br>by<br>region<br>- up to<br>181<br>AD<br>and<br>125 C                    | Varies<br>by<br>region                                             | Varies<br>by<br>region<br>AD:<br>47-<br>100<br>C: 22-<br>106 | NR                                                                                                                                                                 | Braak           | AD:<br>>III                                                                                                                                           | NR | All<br>avg 18 | Cerebellu<br>m,<br>dorsolater<br>al<br>prefrontal<br>cortex<br>(BA9)<br>visual<br>cortex<br>(BA 17) | Microarray,<br>principal<br>component<br>analysis    | Combinati<br>on of<br>microglial<br>and<br>cytokine<br>genes                       | ↑                                    |   |
| Seyfried<br>, 2017         | Baltimore<br>Longitudinal<br>Study of Aging<br>(BLSA)<br>or the Emory<br>Alzheimer's<br>Disease Research<br>Center (ADRC)<br>Brain Bank | AD:<br>20 (+8<br>validat<br>ion)<br>HPC:<br>15<br>C: 15<br>(+8<br>validat<br>ion) | Whole<br>sampl<br>e:<br>AD:<br>16/20<br>HPC:<br>20/9<br>C:<br>21/7 | AD:<br>>55<br>HPC:<br>>71<br>C:<br>>57                       | Whole<br>sample:<br>AD:<br>N/A: 1<br>2-3: 7<br>3-3: 21<br>3-4: 15<br>4-4: 3<br>HPC:<br>2-3: 2<br>3-3: 20<br>3-4: 7<br>C:<br>2-3: 11<br>3-3: 22<br>3-4: 1<br>4-4: 2 | Braak,<br>CERAD | For<br>subset<br>:<br>AD:<br>IV: 8<br>V: 8<br>VI: 24<br>HPC:<br>I: 0<br>II: 3<br>III: 8<br>IV: 16<br>VI: 2<br>C:<br>I: 5<br>II: 15<br>III: 4<br>IV: 4 | NR |               | Dorsolater<br>al<br>prefrontal<br>cortex<br>(BA9)<br>Precuneus<br>(BA 7)                            | Proteomics                                           | Protein<br>network<br>enriched<br>with<br>microglia<br>and<br>astrocyte<br>markers | ↑ relative to C<br>↔ relative to HPC |   |

|             |                                                                                                                 |                                                        |    |    |                                                                           |       |    |    |              |                                                                                                                               |                                                                      |                                          |   |
|-------------|-----------------------------------------------------------------------------------------------------------------|--------------------------------------------------------|----|----|---------------------------------------------------------------------------|-------|----|----|--------------|-------------------------------------------------------------------------------------------------------------------------------|----------------------------------------------------------------------|------------------------------------------|---|
| Zhang, 2013 | HBTRC, validated with brains from National Alzheimer's Coordinating Center Brain Banks and the Miami Brain Bank | Micro array: AD: 376 C: 173 Validation: AD: 377 C: 359 | NR | NR | NR (increased OR for AD with ε4 allele confirmed in overall HBTRC sample) | Braak | NR | NR | All avg 17.8 | Microarray: Cerebellum, dorsolateral prefrontal cortex (BA9), visual cortex (BA17) Validation: temporal and prefrontal cortex | Microarray with analysis of functional categories of gene expression | Microglia gene expression module, TYROBP | ↑ |
|-------------|-----------------------------------------------------------------------------------------------------------------|--------------------------------------------------------|----|----|---------------------------------------------------------------------------|-------|----|----|--------------|-------------------------------------------------------------------------------------------------------------------------------|----------------------------------------------------------------------|------------------------------------------|---|

Table 14: Where there are both young and older controls, values are reported for the older (age-matched controls). Results are expressed relative to control unless specified otherwise. Alzheimer's Disease (AD), Alzheimer's Disease Research Center (ADRC), Apolipoprotein E (APOE), Average (Avg), BrainNet Europe (BNE), Brodmann area (BA), Carboxypeptidase vitellogenic-like (CPVL), Cluster of differentiation (CD), Consortium to Establish a Registry for Alzheimer's Disease (CERAD), Control (C), GRAM domain containing 1C (GRAMD1C), Harvard Brain Tissue Resource Center (HBTRC), High pathology control (HPC), Human leukocyte antigen (HLA), Hours (h), Major histocompatibility complex (MHC), National Institute on Aging (NIA), Not reported (NR), Post-mortem interval (PMI), Polymerase chain reaction based assays (PCR), Regulatory factor X4 (RFX4), Superior frontal gyrus (SFG), Toll-like receptor (TLR), Triggering receptor expressed on myeloid cells 2 (TREM2), TYRO protein tyrosine kinase binding protein (TYROBP)

Table 15: Non-quantitative comparisons

| Author, Year   | Title                                                                                                                                                                                        | Journal                    | Brain Region                                         | Technique                 | Marker                                                             | Results                                                                                                                                                                                                                                                                                                                                                        |
|----------------|----------------------------------------------------------------------------------------------------------------------------------------------------------------------------------------------|----------------------------|------------------------------------------------------|---------------------------|--------------------------------------------------------------------|----------------------------------------------------------------------------------------------------------------------------------------------------------------------------------------------------------------------------------------------------------------------------------------------------------------------------------------------------------------|
| Akiyama, 1993  | Microglia express the type 2 plasminogen activator inhibitor in the brain of control subjects and patients with Alzheimer's disease                                                          | Neuroscience Letters       | Temporal gyrus, angular gyrus, hippocampus (mixed)   | IHC                       | Plasminogen activator inhibitor-2                                  | ↑ intensity of staining, microglia had activated morphology                                                                                                                                                                                                                                                                                                    |
| Akiyama, 1994  | Expression of MRP14, 27E10, interferon-alpha and leukocyte common antigen by reactive microglia in postmortem human brain tissue                                                             | Journal of Neuroimmunology | Hippocampus, mid temporal gyrus and angular gyrus.   | IHC                       | MRP14 (calcium binding protein), CD45, Interferon-alpha            | ↑CD45RB expression in microglia in AD vs. control in the cerebral cortex.<br>↑MRP-14 expression in microglia in AD vs. control. In AD these microglia appeared reactive in shape and frequently formed aggregates in the<br>↑interferon-alpha+ microglia in AD vs. control in the cortex. In AD microglia aggregates in senile plaques were stained intensely. |
| Akiyama, 1994b | Expression of the receptor for macrophage colony stimulating factor by brain microglia and its upregulation in brains of patients with Alzheimer's disease and amyotrophic lateral sclerosis | Brain Research             | Hippocampus, middle temporal gyrus, precentral gyrus | IHC                       | CSF-1                                                              | ↑CSF-1 stained microglia in AD vs. control, activated morphology                                                                                                                                                                                                                                                                                               |
| An, 2009       | Expression and localization of lactotransferrin messenger RNA in the cortex of Alzheimer's disease                                                                                           | Neuroscience Letters       | Temporal cortex (cerebral cortex?)                   | IHC+in situ hybridization | Lactoferritin (iron binding protein)+ HLA-DR to identify microglia | ↑Lactoferritin mRNA in HLA-DR+microglia in AD vs. control, marker of activation                                                                                                                                                                                                                                                                                |
| Arends, 2000   | Microglia, amyloid and dementia in Alzheimer disease. A correlative study                                                                                                                    | Neurobiology of Aging      | Middle frontal gyrus (BA9)                           | IHC                       | CD68                                                               | ↔ correlation with dementia rating, but all but least severe patients had high density<br>↑ Correlated with congophilic amyloid deposits<br>↔ correlation with Aβ or NFT                                                                                                                                                                                       |

|                 |                                                                                                                                                             |                                                    |                                                       |                     |                    |                                                                                                                                                                                                                                                                                                                                                  |
|-----------------|-------------------------------------------------------------------------------------------------------------------------------------------------------------|----------------------------------------------------|-------------------------------------------------------|---------------------|--------------------|--------------------------------------------------------------------------------------------------------------------------------------------------------------------------------------------------------------------------------------------------------------------------------------------------------------------------------------------------|
| Bayer, 1999     | Evidence for activation of microglia in patients with psychiatric illnesses                                                                                 | Neuroscience Letters                               | Hippocampus and frontal cortex                        | IHC                 | HLA-DR             | ↑HLA-DR in AD vs. control                                                                                                                                                                                                                                                                                                                        |
| Bryan, 2008     | Expression of CD74 is increased in neurofibrillary tangles in Alzheimer's disease                                                                           | Molecular Neurodegeneration                        | Hippocampal tissue                                    | Immunocytochemistry | CD74               | ↑CD74 labelled microglia in AD vs. control (marker of activation)                                                                                                                                                                                                                                                                                |
| Carrano, 2011   | Amyloid Beta induces oxidative stress-mediated blood-brain barrier changes in capillary amyloid angiopathy                                                  | Antioxidants & Redox Signaling                     | Occipital pole cortex.                                | IHC                 | NOX-2 + morphology | ↑                                                                                                                                                                                                                                                                                                                                                |
| Christie, 1996  | Expression of the macrophage scavenger receptor, a multifunctional lipoprotein receptor, in microglia associated with senile plaques in Alzheimer's disease | American Journal of Pathology                      | Hippocampal formation and adjacent temporal neocortex | IHC                 | LN3 (HLA-DR)       | ↑ number of activated microglia (HLA-DR stained) in AD (typically associated with plaques) vs. control                                                                                                                                                                                                                                           |
| Christie, 1996b | Expression of the very low-density lipoprotein receptor (VLDL-r), an apolipoprotein-E receptor, in the central nervous system and in Alzheimer's disease    | Journal of Neuropathology & Experimental Neurology | Hippocampus and adjacent temporal lobe                | IHC                 | HLA-DR,            | ↑microglia of activated morphology in AD cortex than in control.<br>- In control there was uniform staining of microglia throughout depth of dentate gyrus, but in AD there was more immunoreactivity in the inner third layer.<br>- very low-density lipoprotein receptor positive microglia colocalize with A $\beta$ in senile plaques in AD. |
| Dickinson, 1988 | Alzheimer's disease. A double-labeling immunohistochemical study of senile plaques                                                                          | American Journal of Pathology                      | Hippocampus and parahippocampal gyrus                 | IHC                 | RCA-1              | ↑                                                                                                                                                                                                                                                                                                                                                |
| Dickson, 1996   | Glycation and microglial reaction in lesions of Alzheimer's disease                                                                                         | Neurobiology of Aging                              | Hippocampus                                           | IHC                 | HLA-DR             | ↑                                                                                                                                                                                                                                                                                                                                                |

|                 |                                                                                                                                                                  |                                                                        |                                                                           |                                   |                                                                                              |                                                                              |
|-----------------|------------------------------------------------------------------------------------------------------------------------------------------------------------------|------------------------------------------------------------------------|---------------------------------------------------------------------------|-----------------------------------|----------------------------------------------------------------------------------------------|------------------------------------------------------------------------------|
| Drache, 1997    | Bcl-xl-specific antibody labels activated microglia associated with Alzheimer's disease and other pathological states                                            | Journal of Neuroscience Research                                       | Amygdala, cerebellum, hippocampus, neocortex (BA 21, 22)                  | Western, IHC                      | Bcl-xl (homologue bcl-2) in microglia                                                        | ↓, lower microglia survival                                                  |
| Grundke-Iqbal   | Ferritin is a component of the neuritic (senile) plaque in Alzheimer dementia                                                                                    | Acta Neuropathologica                                                  | Hippocampus                                                               | IHC                               | Ferritin- positive microglia                                                                 | ↑                                                                            |
| Guillemin, 2005 | Indoleamine 2,3 dioxygenase and quinolinic acid immunoreactivity in Alzheimer's disease hippocampus                                                              | Neuropathology & Applied Neurobiology                                  | Temporal lobe (hippocampus, amygdala, fusiform cortex, entorhinal cortex) | IHC                               | Quinolinic acid, indoleamine co-labelled with ferritin (thought to mark activated microglia) | ↑                                                                            |
| Haga, 1989      | Demonstration of microglial cells in and around senile (neuritic) plaques in the Alzheimer brain. An immunohistochemical study using a novel monoclonal antibody | Acta Neuropathologica                                                  | Not reported                                                              | IHC and immunoperoxidase staining | AD11/8 (stains microglia) and peroxidase staining for microglia                              | ↑                                                                            |
| Hoozemans, 2001 | Cyclooxygenase expression in microglia and neurons in Alzheimer's disease and control brain                                                                      | Acta Neuropathologica                                                  | Temporal and frontal cortex                                               | IHC                               | COX-2 and COX-1 co-localized with CD68                                                       | ↑                                                                            |
| Jellinger, 1990 | Brain iron and ferritin in Parkinson's and Alzheimer's diseases                                                                                                  | Journal of Neural Transmission - Parkinsons Disease & Dementia Section | Substantia nigra,                                                         | IHC                               | Ferritin                                                                                     | ↑, Numerous reactive microglia in AD associated with plaques, not in control |
| Liu, 2005       | LPS receptor (CD14): A receptor for phagocytosis of Alzheimer's amyloid peptide                                                                                  | Brain                                                                  | Hippocampus, occipital cortex, frontal cortex                             | IHC                               | CD14+ microglia                                                                              | ↑                                                                            |

|                         |                                                                                                                                         |                                                                                                             |                                 |     |                                                           |                                                                                                           |
|-------------------------|-----------------------------------------------------------------------------------------------------------------------------------------|-------------------------------------------------------------------------------------------------------------|---------------------------------|-----|-----------------------------------------------------------|-----------------------------------------------------------------------------------------------------------|
| Lopez-Gonzalez, 2015    | Neuroinflammatory signals in Alzheimer disease and APP/PS1 transgenic mice: correlations with plaques, tangles, and oligomeric species. | Journal of Neuropathology & Experimental Neurology. 74(4):319-44, 2015 Apr                                  | Frontal cortex area 8           | IHC | Iba1                                                      | ↑ number and size of microglia in all stages of AD, more hypertrophic and round microglia at later stages |
| McGeer, 1989            | Immune system response in Alzheimer's disease                                                                                           | Canadian Journal of Neurological Sciences                                                                   | Temporal cortex                 | IHC | HLA-DR                                                    | ↑                                                                                                         |
| McGeer, 1993            | Microglia in degenerative neurological disease                                                                                          | Glia                                                                                                        | Temporal cortex                 | IHC | CD45, HLA-DR-DP-DQ, CD11b, CD11c, FcγRI, FcγRII           | ↑                                                                                                         |
| Meadowcroft, 2015       | Cortical iron regulation and inflammatory response in Alzheimer's disease and APPSWE/PS1ΔE9 mice: a histological perspective            | Frontiers in Neuroscience. 9 (JUL) (no pagination), 2015. Article Number: 00255. Date of Publication: 2015. | Entorhinal cortex               | IHC | Iba1                                                      | ↔ total staining, AD has more clustering                                                                  |
| Minnasch, 2003          | Demonstration of puromycin-sensitive alanyl aminopeptidase in Alzheimer disease brain                                                   | Legal Medicine                                                                                              | Cortical and hippocampal tissue | IHC | Puromycin-sensitive alanyl aminopeptidase                 | ↑ Upregulation of PSA in AD microglia.                                                                    |
| Narayan, 2015           | Increased acetyl and total histone levels in post-mortem Alzheimer's disease brain                                                      | Neurobiology of Disease                                                                                     | inferior temporal gyrus         | IHC | HLA                                                       | ↑                                                                                                         |
| Perlmutter, 1992        | MHC class II-positive microglia in human brain: Association with Alzheimer lesions                                                      | Journal of Neuroscience Research                                                                            | neocortical, hippocampus        | IHC | RCA, HLA, LN3                                             | ↑ activated morphology with HLA and LN3, more clusters, less uniform distribution than in controls        |
| R. Bowser and S. Reilly | Expression of FAC1 in activated microglia during Alzheimer's disease                                                                    | Neuroscience Letters                                                                                        | Midfrontal and temporal cortex  | IHC | HLA-DR+FAC1 (DNA binding protein, not microglia specific) | ↑HLA-DR in AD vs. control<br>↑HLA-DR containing with FAC1<br>In AD vs. control (may indicate activation)  |

|                  |                                                                                                                                                             |                                                    |                                                                                                    |     |                                                |                                                                                                                                                                                                                                                                                                                         |
|------------------|-------------------------------------------------------------------------------------------------------------------------------------------------------------|----------------------------------------------------|----------------------------------------------------------------------------------------------------|-----|------------------------------------------------|-------------------------------------------------------------------------------------------------------------------------------------------------------------------------------------------------------------------------------------------------------------------------------------------------------------------------|
| Rogers, 1988     | Expression of immune system-associated antigens by cells of the human central nervous system: relationship to the pathology of Alzheimer's disease          | Neurobiology of Aging                              | Cortical and subcortical structures                                                                | IHC | HLA-DR                                         | ↑HLA-DR in gray matter in AD vs. non AD elderly control .<br>↔ in HLA-DR in white matter of AD vs. non AD elderly control .<br>↑HLA-DR aggregates in AD vs. control typically in layers II-V, and appear most concentrated around plaques. HLA-DR clustering is also found in rare plaques of healthy elderly controls. |
| Rozemuller, 2000 | Activated microglial cells and complement factors are unrelated to cortical Lewy bodies                                                                     | Acta Neuropathologica                              | Anterior cingulate gyrus                                                                           | IHC | HLA-1DR (CR3/43, LN3), CD68, RCA-1, ferritin   | ↑ Clustering around plaques, activated                                                                                                                                                                                                                                                                                  |
| Ryu, 2008        | A leaky blood-brain barrier, fibrinogen infiltration and microglial reactivity in inflamed Alzheimer's disease brain                                        | Journal of Cellular and Molecular Medicine         | Entorhinal cortex                                                                                  | IHC | HLA-DR (CR3/43)                                | ↑ activated microglia                                                                                                                                                                                                                                                                                                   |
| Sasaki, 1997     | Microglial activation in early stages of amyloid beta protein deposition                                                                                    | Acta Neuropathologica                              | Isocortical area, hippocampus, cerebellum                                                          | IHC | LN3, LN1, LCA CR3/43, KP1, Ki-M1p, 2B11+PD7/26 | ↑ microglia of activated morphology                                                                                                                                                                                                                                                                                     |
| Scott, 1993      | Inability to detect beta-amyloid protein precursor mRNA in Alzheimer plaque-associated microglia                                                            | Experimental Neurology                             | Hippocampus, superior and middle temporal gyri, visual cortex, entorhinal cortex, amygdala (mixed) | IHC | LN3                                            | ↑ microglia with activated morphology, associated with amyloid deposits and tau                                                                                                                                                                                                                                         |
| Streit, 2009     | Dystrophic (senescent) rather than activated microglial cells are associated with tau pathology and likely precede neurodegeneration in Alzheimer's disease | Acta Neuropathologica                              | Temporal lobe                                                                                      | IHC | Iba-1                                          | ↑degenerated microglia in AD vs. Control                                                                                                                                                                                                                                                                                |
| Su, 1997         | Bax protein expression is increased in Alzheimer's brain: correlations with DNA damage, Bcl-2 expression, and brain pathology                               | Journal of Neuropathology & Experimental Neurology | Hippocampal formation                                                                              | IHC | Bax and HLA-DR co-stain (apoptotic microglia)  | ↑ apoptotic microglia                                                                                                                                                                                                                                                                                                   |



|                  |                                                                                                                                   |                                             |                                                                            |                                                                 |                                                         |                                                               |
|------------------|-----------------------------------------------------------------------------------------------------------------------------------|---------------------------------------------|----------------------------------------------------------------------------|-----------------------------------------------------------------|---------------------------------------------------------|---------------------------------------------------------------|
| Styren, 1990     | Molecular, cellular, and pathologic characterization of HLA-DR immunoreactivity in normal elderly and Alzheimer's disease brain   | Experimental Neurology                      | Hippocampus and superior frontal gyrus                                     | IHC                                                             | HLA-DR                                                  | ↑ microglia associated with plaques, more reactive morphology |
| Togo, 2000       | Expression of CD40 in the brain of Alzheimer's disease and other neurological diseases                                            | Brain Research                              | Hippocampus and adjacent temporal isocortex                                | IHC                                                             | CD40 + HLA-DR                                           | ↑CD40 staining                                                |
| Togo, 2002       | Occurrence of T cells in the brain of Alzheimer's disease and other neurological diseases                                         | Journal of Neuroimmunology                  | Hippocampus, other cortical areas                                          | IHC                                                             | HLA-DR                                                  | ↑                                                             |
| Tooyama, 1990    | Reactive microglia express class I and class II major histocompatibility complex antigens in Alzheimer's disease                  | Brain Research                              | Medial temporal cortex including the hippocampus and parahippocampal gyrus | IHC                                                             | HLA A, B C (MHC I) HLA-DR (MHCII), LCA                  | ↑ MHC I, MHC II                                               |
| van Dullin, 2013 | Comparison of Histological Techniques to Visualize Iron in Paraffin-embedded Brain Tissue of Patients with Alzheimer's Disease    | Journal of Histochemistry and Cytochemistry | Frontal Cortex                                                             | IHC (compared three different iron IHC methods to Ferritin IHC) | Ferritin positive microglia (activation or dysfunction) | ↑ Iron-positive microglia labelling in AD brains vs. control. |
| Wiendl, 2005     | Expression of the immune-tolerogenic major histocompatibility molecule HLA-G in multiple sclerosis: Implications for CNS immunity | Brain                                       | Not reported                                                               | IHC                                                             | HLA-G                                                   | ↑HLA-G in AD vs. control (correlates with MHCII)              |

|              |                                                                                                                                                                 |                                |                                                                      |                            |                                                                     |                                                                                                                               |
|--------------|-----------------------------------------------------------------------------------------------------------------------------------------------------------------|--------------------------------|----------------------------------------------------------------------|----------------------------|---------------------------------------------------------------------|-------------------------------------------------------------------------------------------------------------------------------|
| Wirhth, 2013 | Oligomeric pyroglutamate amyloid-beta is present in microglia and a subfraction of vessels in patients with Alzheimer's disease: implications for immunotherapy | Journal of Alzheimer's Disease | gyrus temporalis superior                                            | IHC                        | 9D5 (truncated amyloid) positive microglia --> phagocytic microglia | ↑                                                                                                                             |
| Wong, 2001   | Advanced glycation endproducts co-localize with inducible nitric oxide synthase in Alzheimer's disease                                                          | Brain Research                 | Temporal cortex (BA 22)                                              | IHC                        | iNOS                                                                | ↑ Reactive microglia (expressing iNOS and advanced glycation end-products) in advanced (Braak III-IV) but not early AD (I-II) |
| Wu, 2005     | Apoptotic signals within the basal forebrain cholinergic neurons in Alzheimer's disease                                                                         | Experimental Neurology         | Nucleus basalis of Meynert                                           | IHC                        | CD68                                                                | ↑                                                                                                                             |
| Xia, 1998    | Immunohistochemical study of the beta-chemokine receptors CCR3 and CCR5 and their ligands in normal and Alzheimer's disease brains                              | American Journal of Pathology  | Temporal cortex, visual cortex, caudate, putamen, cerebellum (mixed) | IHC                        | CCR3, CCR5 on microglia                                             | ↑ chemokines CCR3 and CCR5 staining intensity on reactive microglia                                                           |
| Yamada, 1994 | Immunohistochemistry using antibodies to alpha-interferon and its induced protein, MxA, in Alzheimer's and Parkinson's disease brain tissues                    | Neuroscience Letters           | Parietal cortex                                                      | IHC                        | LCA, $\alpha$ IFN, MxA                                              | ↑                                                                                                                             |
| Yamada, 1995 | White matter microglia produce membrane-type matrix metalloprotease, an activator of gelatinase A, in human brain tissues                                       | Acta Neuropathologica          | Parietal lobe white matter                                           | IHC, in situ hybridization | LCA, matrix metalloprotease                                         | ↑ in IHC, ↔ in mRNA                                                                                                           |
| Yamada, 1995 | Microglial localization of alpha-interferon receptor in human brain tissues                                                                                     | Neuroscience Letters           | Not reported                                                         | IHC                        | alpha-IFN receptor colocalized with LCA                             | ↑                                                                                                                             |

|                 |                                                                                                                                                                                                 |                                                                                       |                                                               |                            |                                                            |                                                                                                                                            |
|-----------------|-------------------------------------------------------------------------------------------------------------------------------------------------------------------------------------------------|---------------------------------------------------------------------------------------|---------------------------------------------------------------|----------------------------|------------------------------------------------------------|--------------------------------------------------------------------------------------------------------------------------------------------|
| Yamada, 1995    | Selective localization of gelatinase A, an enzyme degrading beta-amyloid protein, in white matter microglia and in Schwann cells                                                                | Acta Neuropathologica                                                                 | Parietal white matter                                         | IHC                        | LCA                                                        | ↑                                                                                                                                          |
| Yamada, 1998    | Possible roles of transglutaminases in Alzheimer's disease                                                                                                                                      | Dementia & Geriatric Cognitive Disorders                                              | Parietal lobe and hippocampus                                 | IHC, western blot          | LCA                                                        | ↑parietal cortex, not hippocampus (control cases had staining in hippocampus, AD had none)                                                 |
| Yamada, 1999    | Melanotransferrin is produced by senile plaque-associated reactive microglia in Alzheimer's disease                                                                                             | Brain Research                                                                        | Not reported                                                  | IHC, in situ hybridization | Metallothionein                                            | ↑ in reactive microglia                                                                                                                    |
| Yan, 1997       | Amyloid-beta peptide-receptor for advanced glycation endproduct interaction elicits neuronal expression of macrophage-colony stimulating factor: a proinflammatory pathway in Alzheimer disease | Proceedings of the National Academy of Sciences of the United States of America       | Temporal lobe                                                 | IHC                        | Macrophage colony-stimulating factor colocalized with CD68 | ↑                                                                                                                                          |
| Yoshiyama, 2000 | Expression of invariant chain and pro-cathepsin L in Alzheimer's brain                                                                                                                          | Neuroscience Letters                                                                  | Hippocampal Formation, Entorhinal cortex, and parietal cortex | IHC                        | HLA-DR, pro-cathepsin L MHCII invariant chain              | ↑HLA-DR ↑Microglia stained with pro-cathepsin L in AD vs. control .<br>↑ Microglia stained with MHC II invariant chain in AD vs. control . |
| Zeineh, 2015    | Activated iron-containing microglia in the human hippocampus identified by magnetic resonance imaging in Alzheimer disease                                                                      | Neurobiology of Aging. 36 (9) (pp 2483-2500), 2015. Date of Publication: 01 Sep 2015. | Subiculum                                                     | IHC                        | Iron containing microglia (CD163)                          | ↑                                                                                                                                          |

Supplementary Materials Table 15: Where there are both young and older controls, values are reported for the older (age-matched controls). Results are expressed relative to control unless specified otherwise. Amyloid- $\beta$  (A $\beta$ ), Alzheimer's Disease (AD), Brodmann area (BA), Cluster of differentiation (CD), Colony stimulating factor (CSF), Control (C), Cornu ammonis (CA), Dentate gyrus (DG), Human leucocyte antigen (HLA), Ionized calcium-binding adapter molecule 1

(Iba1), Immunohistochemistry (IHC), Inducible nitric oxide synthase (iNOS), Interferon (IFN), Leukocyte common antigen (LCA), Major histocompatibility complex (MHC), Neurofibrillary tangles (NFT), Polymerase chain reaction based assays (PCR), Triggering receptor expressed on myeloid cells 2 (TREM2)

## Appendix 1: Search Protocol

### Systematic Search Protocol

*Written based on the WHO Review Protocol Template, 2011*

1. Title: Markers of neuroinflammation in post-mortem Alzheimer's Disease samples: A systematic review
2. Background: Neuroinflammation is a widely-noted characteristic of Alzheimer's Disease, however, there is great variability in the measures of neuroinflammation used, and it is not clear specifically what markers, if any, are consistently increased in diseased brains.
3. Objective: This review aims to bring together all the research on measures of neuroinflammation in Alzheimer's Disease to identify a pattern of immune response activation in this disease.
4. Review Question (Population Intervention Comparison Outcome)

Population: Neuropathologically confirmed Alzheimer's Disease patients, examined post-mortem Intervention: n/a

Comparison: neuropathologically normal controls,

Outcome: levels of inflammatory markers in the brain

5. Evidence Gathering and Study Selection (list databases, websites and journals which will be searched)  
Ovid will be used to query the Medline, Embase and PsychInfo databases using exp (MeSH, Emtree) terms and title, abstract and keywords search terms specifically designed for each database. Full search terms for each database and results found per database are listed in the Appendix.

Reference searches: Bibliographies of papers deemed eligible for this review will be hand searched to identify any additional eligible references, which will then be screened for title, abstract or full text as appropriate.

#### 6. Eligibility Criteria

The results of these searches will be combined and deduped using (Endnote or CREBP Systematic Reviews Assistant). They will then be screened for title and abstract, and then full text using the following eligibility criteria.

- i) Type of study included: Papers published in peer reviewed journals.
- ii) Types of participants: Studies that examine the brains of human patients with Alzheimer's Disease post-mortem (after death) will be included. Alzheimer's disease must have been confirmed by neuropathological examination at autopsy. Controls should be neuropathologically normal as confirmed at autopsy.
- iii) Types of outcome measures: Measurement of neuroinflammation in the brain at death. These include immune cells and their markers, cytokines and their receptors, chemokines and their receptors, prostaglandins, leukotrienes and the enzymes responsible for their synthesis, immunoglobulins, other immune effector molecules and complement. Measures of neuroinflammation detected by any technique will be included, provided the assessment occurred post-mortem.

#### 7. Exclusion Criteria

Conference proceedings and abstracts will be excluded as they do not provide sufficient information to evaluate the study. Reviews, animal studies, studies not taking place in neuropathologically confirmed Alzheimer's Disease, papers measuring inflammatory markers outside of the brain, PET studies on living subjects and studies not using neuropathologically normal patients as a control will be excluded.

#### 8. Data extraction

Data extracted will include:

- Citation information
- Origin of brain tissue (hospital, brain bank etc.)
- Method of neuropathological characterization of AD cases and controls
- Subject age, sex and ethnicity, pH of brain samples, quality of RNA (if applicable), duration in fixative solution, brain region examined, method of measuring neuroinflammation used and results. The final decision on what to include in the published tables will be made by the systematic review author team based on importance and variability within the

studies (for example, if most studies do not report the RNA quality in their brain samples, this column may be omitted from the final table.

## **9. Data Synthesis**

Narrative synthesis is planned, with inflammatory measures grouped together as appropriate depending on number of papers and commonalities in measurement (for instance, cellular markers of neuroinflammation may be grouped and discussed together). The number of papers returned by this search is expected to be high, and thus results may be published separately based on inflammatory marker grouping. Statistical synthesis is not expected to be possible as there is wide variability in the types of measures (qPCR, microarray, Western blot, immunohistochemistry etc.), types of inflammatory outcomes and brain regions investigated, but will be considered if feasible given the data.

## **10. Dissemination**

A manuscript will be prepared for submission to a peer reviewed journal in the neuroscience field.

## APPENDIX 2: Search terms and results

### Results of Search October 14<sup>th</sup> 2015 EMBASE full (kw + exp) – 6699 references in restricted, 14471 in full search

Embase with restrictions October 14<sup>th</sup> – removes conference abstracts, editorials, conference proceedings and reviews in the ovid search

1. Alzheimer disease/
2. (((Alzheimer\* or ase or mild) adj2 cognitive adj2 impairment) or cognitive) adj2 decline).ti,ab,kw.
3. 1 or 2
4. (Brain\* or hippocamp\* or encephalon or Blood Brain Barrier or hemato-encephalic barriers or barriers brain-blood or hemato-encephalic barrier or barriers hemato-encephalic or barrier hemato-encephalic or hemato-encephalic barrier or truncus cerebri or truncus cerebri or cerebri truncus or brainstems or cerebri truncus or Mesencephalon or mesencephalon or mesencephalons or midbrains or midbrain or Cerebral Peduncle or Cerebral Crus or Substantia Nigra or nigras substantia or nigra substantia or substantia nigras or Pars Compacta or Pars Reticulata or Tegmentum Mesencephali or midbrain trigeminal nucleus or nucleus peripeduncular or annulari nucleus or nervi trochlearis nucleus or midbrain tegmentum or mesencephalus tegmentum or tegmental nucleus ventral or mesencephalic tegmentums or midbrain tegmentums or trigeminal nucleus mesencephalic or tegmentums midbrain or trochlearis nucleus nervi or nucleus annularis or trigeminal nucleus midbrain or nucleus annular or mesencephali tegmentum or darkshevichs nucleus or tegmentums mesencephalic or ventral tegmental nucleus or mesencephalic trigeminal nucleus or nervi trochleari nucleus or nucleus darkshevich's or darkschewitsch nucleus or tegmentum of midbrain or nucleus annulari or cajal interstitial nucleus or mesencephalic tegmentum or nuclei accessory oculomotor or trochlear nucleus or annularis nucleus or nucleus mesencephalic trigeminal or nucleus of darkschewitschor peripeduncular nucleus or oculomotor nuclei accessory or tegmentum midbrain or tegmentum mesencephali or nucleus nervi trochlearis or darkshevich nucleus or nucleus tractus mesencephalici nervi trigemini or interstitial nucleus of cajal or Cerebral Aqueduct or ducts mesencephalic or mesencephalic ducts or aqueduct mesencephalic or sylvian aqueducts or duct mesencephalic or sylvius aqueduct or cerebri aqueductus or aqueductus cerebri or cerebral aqueduct or aqueduct sylvian or aqueduct of sylvius or mesencephalic duct or cerebral aqueducts or aqueducts sylvian or aqueduct cerebral or sylvian aqueduct or aqueductus cerebri or aqueducts mesencephalic or cerebri aqueductus or mesencephalic aqueduct or Midbrain Reticular Formation or Pedunculopontine Tegmental Nucleus or nucleus tegmentalis pedunculopontinus or nucleus pedunculopontine tegmental or tegmental nucleus pedunculopontine or pedunculopontine tegmental nucleus or Oculomotor Nuclear Complex or Edinger-Westphal Nucleus or Periaqueductal Grey or greys central periaqueductal or griseum centrales or central grey substance of midbrain or periaqueductal greys central or grey matter periaqueductal or grey central periaqueductal or substantia grisea centralis or periaqueductal grey matter or central periaqueductal grey or grisea centralis substantia or periaqueductal grey or centrale mesencephali griseum or centrale mesencephalus griseum or centrale griseum or grey matters periaqueductal or centrales griseum or periaqueductal grey central or substantia grisea centralis mesencephali or mesencephalus griseum central or midbrain central grey or central grey mesencephalic or central periaqueductal greys or central grey midbrain or griseum centrale mesencephali or Raphe Nuclei or nucleus incertus or nucleus superior central or nuclei raphe or nucleus interfascicular or superior central nucleus or raphe nuclei or interfascicular nucleus or raphe nucleus or incertus nucleus or central nucleus superior or rostral linear nucleus of the raphe or caudal linear nucleus of the raphe or rostral linear nucleus of raphe or nucleus raphe or Dorsal Raphe Nucleus or Interpeduncular Nucleus or Midbrain Raphe Nuclei or Red Nucleus or nucleus ruber or red nucleus or nucleus red or Ventral Tegmental Area or tegmentalis ventralis area or tegmentalis ventrali area or area tegmentalis ventralis or ventral tegmental area of tsai or ventral tegmental area or tegmental area ventral or area tegmentalis ventrali or Locus Coeruleus or coeruleus complex locus or complices locus coeruleus or locus caeruleus or complex locus ceruleus or complices locus ceruleus or coeruleus complices locus or ceruleus complex locus or locus ceruleus complex or complex locus coeruleus or locus ceruleus complices or locus ceruleus or nucleus pigmentosus pontis or locus coeruleus complices or pontis nucleus pigmentosus or ceruleus complices locus or locus coeruleus or locus coeruleus complex or Tectum Mesencephali or corpora quadrigemina or inferior colliculus commissures or colliculus commissures superior or colliculus commissures inferior or quadrigeminal plates or superior colliculus commissure or plate quadrigeminal or commissure of superior colliculus or quadrigemina corpora or commissure of inferior colliculus or lamina quadrigemina or inferior colliculus commissure or colliculus commissure inferior or quadrigeminal plate or tectum mesencephalus or mesencephalus tectum or plates quadrigeminal or quadrigemina lamina or colliculus commissure superior or Inferior Colliculi or colliculi inferior or inferior colliculi or inferiors colliculus or posterior colliculus or brachial nucleus of the inferior colliculus or caudal colliculus or colliculus inferiors or colliculus caudal or inferior colliculus or colliculus posterior or colliculus inferior or Subcommissural Organ or subcommissural organs or subcommissural organ or organs subcommissural or organ subcommissural or Superior Colliculi or mammalian optic lobes or optic

lobe mammalian or optic tectums or superior colliculi or optic tectum or anterior colliculus or colliculus superior or human optic lobes or superior colliculus or optic lobes human or optic lobes mammalian or optic lobe human or colliculi superior or tectum optic or tectums optic or mammalian optic lobe or human optic lobe or colliculus anterior or Reticular Formation or formations reticular or reticular formation or reticular formations or formation reticular or edunculopontine Tegmental Nucleus or nucleus tegmentalis pedunculopontinus or nucleus pedunculopontine tegmental or tegmental nucleus pedunculopontine or pedunculopontine tegmental nucleus or Respiratory Center or centers respiratory or respiratory centers or center respiratory or respiratory center or hombencephalon or hind brains or brains hind or rhombencephalons or hindbrain or hindbrains or brain hind or rhombencephalon or hind brain or Medulla Oblongata or medulla oblongata or nucleus ambiguous or arcuate nucleus-1 or accessory cuneate nucleus or nucleus external cuneate or cuneate nucleus accessory or nucleus ambiguous or medulla oblongatas or arcuate nucleus of the medulla or cuneate nucleus lateral or nucleus lateral cuneate or ambiguous nucleus or cuneate nucleus external or arcuate nucleus 1 or external cuneate nucleus or ambiguous nucleus or arcuate nucleus-1s or lateral cuneate nucleus or Area Postrema or area postremas or trigger zone chemoreceptor or chemoreceptor trigger zone or chemoreceptor trigger zones or trigger zones chemoreceptor or zone chemoreceptor trigger or postrema area or zones chemoreceptor trigger or area postrema or Olivary Nucleus or nucleus basalis olivary or nucleus olivary or basalis olivary nucleus or nucleus olivary basal or olivary basal nucleus or basal nucleus olivary or olivary nucleus or Raphe nuclei or nucleus incertus or nucleus superior central or nuclei raphe or nucleus interfascicular or superior central nucleus or raphe nuclei or interfascicular nucleus or raphe nucleus or incertus nucleus or central nucleus superior or rostral linear nucleus of the raphe or caudal linear nucleus of the raphe or rostral linear nucleus of raphe or nucleus raphe or Nucleus Raphe Obscurus or Nucleus Raphe Pallidus or Solitary Nucleus or solitary nuclear complices or nucleus of tractus solitaries or complex solitary nuclear or tractus solitarii nuclei or nucleus solitaries or solitarius nucleus tractus or tractus solitarius nucleus or solitarius nuclei tractus or solitary tract nucleus or nucleus solitary tract or solitary nuclear complex or tractus solitarius nuclei or nuclear complices solitary or nuclei tractus solitarii or solitary nucleus or nucleus solitary or nucleus of the solitary tract or nuclear complex solitary or complices solitary nuclear or nucleus of solitary tract or nucleus tractus solitaries or Trigeminal Nucleus, Spinal or trigeminal nucleus spinal or nucleus spinal trigeminal or spinal trigeminal nucleus or Trigeminal Caudal Nucleus or caudal nucleus trigeminal or nucleus trigeminal caudal or trigeminal caudal nucleus or Metencephalon or Cerebellum or corpus cerebellus or parencephalons or cerebellus corpus or cerebellum or cerebellums or corpus cerebelli or parencephalon or cerebelli corpus or Cerebellar Cortex or cerebelli cortex or cortex cerebellus or cerebellar cortex or cortex cerebelli or cerebellus cortex or cortex cerebellar or Cerebellar Vermis or Purkinje Cells or purkinje cells or cells purkinje or Cerebellar Nuclei or nucleus dentatus or Cerebellopontine Angle or central nucleus or central nucleus or interposed nucleus anterior or nucleus globosus or medial cerebellar nucleus or emboliformis nucleus or nuclei cerebellar or intracerebellar nuclei or nucleus fastigii or nucleus fastigial or fastigii nucleus or central nuclei or nuclei central or deep cerebellar nucleus or intracerebellar nucleus or nucleus fastigial cerebellar or nucleus anterior interposed or nucleus intracerebellar or anterior interposed nucleus or nucleus anterior interpositus or nucleus medial cerebellar or nuclei intracerebellar or nucleus dentate or dentate nucleus or interpositus nucleus anterior or globosus nucleus or cerebellar nucleus deep or nucleus central or nucleus cerebellar or cerebellar nuclei deep or nucleus dentate cerebellar or anterior interpositus nucleus or cerebellar nucleus medial or cerebellar nuclei or fastigial cerebellar nucleus or Pons or pons or varolii pons or pontes or pons varolius or varolius pons or pons varolii or ponte or Barrington's Nucleus or Cochlear Nucleus or cochlear nucleus or nuclei cochlear or cochlear nuclei or nucleus cochlear or Kolliker-Fuse Nucleus or Middle Cerebellar Peduncle or Pontine Tegmentum or Abducens Nucleus or Facial Nucleus or Parabrachial Nucleus or Nucleus Raphe Magnus or Superior Olivary Complex or Trapezoid Body or Trigeminal Motor Nucleus or Vestibular Nuclei or schwalbes nucleus or nucleus schwalbe or vestibular nuclei or vestibular nucleus medial or nuclei vestibular or schwalbe's nucleus or nucleus schwalbe's or medial vestibular nucleus or schwalbe nucleus or nucleus medial vestibular or Vestibular Nucleus, Lateral or deiters nucleus or deiter's nucleus or nucleus of deiters or lateral vestibular nucleus or nucleus lateral vestibular or vestibularis laterali nucleus or nucleus vestibularis laterali or vestibular nucleus lateral or vestibularis magnocellularis nucleus or vestibularis magnocellularis nucleus or deiter nucleus or nucleus vestibularis magnocellularis or nucleus vestibularis magnocellularis or nucleus deiter or nucleus vestibularis lateralis or vestibularis lateralis nucleus or nucleus deiter's or Tectospinal Fibers or Trigeminal Nuclei or trigeminal nucleus or trigeminal nuclear complices or trigeminal nuclear complex or nuclei trigeminal or trigeminal nuclei or nucleus trigeminal or nuclear complices trigeminal or nuclear complex trigeminal or Grey Matter or grey matter or grey matters cerebellar or grey matter cerebellar or matters grey or matter cerebellar grey or grey matter cerebellar or cerebellar grey matters or grey matters or matter cerebellar grey or cerebellar grey matter or matters grey or cerebellar grey matters or matters cerebellar grey or grey matters cerebellar or matters cerebellar grey or grey matter or cerebellar grey matter or matter grey or matter grey or White Matter or white matter cerebellar or matter cerebellar white or matter white or matters cerebellar white or white matters cerebellar or cerebellar white matters or cerebellar white matter or matters white or white matter or white matters or Cerebral Ventricles or cerebral ventricle or cerebral ventricles or monro foramen or ventricles cerebral or foramen of monro or cerebral ventricular system or ventricle cerebral or Choroid Plexus or choroideus plexus or plexus choroideus or choroid plexus or chorioid plexus or plexus chorioid or plexus choroid or Ependyma or ependymal or ependymas or



Fourth Ventricle or ventricolo quarto or ventricles fourth or ventricle fourth or 4th ventricle or quarto ventricolos or ventricle 4th or ventricles 4th or fourth ventricle or ventricolos quarto or fourth ventricles or 4th ventricles or quarto ventricolo or Lateral Ventricles or lateral ventricle or subventricular zones or lateral ventricles or ventricle lateral or zone subventricular or ventricles lateral or subventricular zone or zones subventricular or Septum Pellucidum or septum supracommissural or pelusidum septum or septum pellucidum or lucidums septum or supracommissural septum or pellucidum septum or septum pelusidums or septum pelusidum or pelusidums septum or septum lucidums or supracommissural septums or septums supracommissural or lucidum septum or septum lucidum or Third Ventricle or 3rd ventricle or ventricles third or ventricles 3rd or third ventricle or ventricle 3rd or 3rd ventricles or third ventricles or ventricle third or Limbic System or limbic system or system limbic or systems limbic or limbic systems or Amygdala or amygdaloid bodies or corpus amygdaloideums or nucleus intercalated amygdaloid or corpus amygdaloideum or amygdaloid body or complex amygdaloid nuclear or amygdaloid nuclear complices or amygdaloid nucleosor intercalata massa or amygdaloideums corpus or intercalatas massa or amygdaloid nucleus intercalated or nuclear complices amygdaloid or archistriatum or amygdala or massa intercalates or nucleus amygdaloid or amygdaloideum corpus or amygdalae nucleus or nuclear complex amygdaloid or archistriatum or nucleus amygdalae or amygdaloid nuclear complex or Basolateral Nuclear Complex or Central Amygdaloid Nucleus or Corticomедial Nuclear Complex or Periamygdaloid Cortex or epithalamus or Habenula or commissure habenular or habenula complex or habenulas or complices habenula or nucleus habenularis or habenular commissures or complex habenula or habenula complices or nucleus habenular or nucleus habenulari or commissures habenular or habenula or habenularums commissura or commissura habenularum or habenularis nucleus or habenular nuclei or commissura habenularums or nuclei habenular or habenulari nucleus or habenular nucleus or Pineal Gland or pineales corpus or body pineal or glands pineal or pineal glands or pineal body or cerebri epiphysis or corpus pineales or gland pineal or pineale corpus or bodies pineal or corpus pineale or pineal gland or pineal bodies or epiphysis cerebri or Hippocampus or hippocampal formation or propers hippocampus or hippocampus propers or formations hippocampal or horn ammon's or schaffer collateral or ammon horn or hippocampus or horn ammon or cornu ammonis or hippocampus proper or proper hippocampus or collaterals schaffer or formation hippocampal or hippocampal formations or subiculum or subiculum or ammon's horn or CA1 Region, Hippocampal or regio superior of hippocampus or field hippocampus ca1 or ca1 stratum radiatum or stratum radiatum ca1 or hippocampal sector ca1 or hippocampus ca1 field or hippocampus regio superior or ca1 stratum radiatums or sector ca1 hippocampal or ca1 field hippocampus or radiatums ca1 stratum or stratum radiatums ca1 or ca1 hippocampal sector or ca1 pyramidal cell area or ca1 region hippocampal or ca1 pyramidal cell layer or ca1 stratum pyramidale or stratum pyramidale ca1 or cornu ammonis 1 area or radiatum ca1 stratum or CA2 Region, Hippocampal or ca2 stratum pyramidale or radiatums ca2 stratum or cornu ammonis 2 area or ca2 field hippocampus or stratum pyramidale ca2 or stratum radiatum ca2 or ca2 stratum radiatums or radiatum ca2 stratum or sector ca2 hippocampal or region hippocampal ca2 or ca2 field of hippocampus or stratum radiatums ca2 or ca2 region hippocampal or hippocampal sector ca2 or hippocampal ca2 region or hippocampus ca2 field or ca2 pyramidal cell layer or field hippocampus ca2 or ca2 pyramidal cell area or CA3 Region, Hippocampal or stratum lucidum ca3 or ca3 stratum lucidum or stratum lucidums ca3 or lucidum ca3 stratum or ca3 region hippocampal or ca3 pyramidal cell area or hippocampus ca3 field or ca3 hippocampal sector or sector ca3 hippocampal or ca3 stratum radiatum or ca3 stratum lucidums or hippocampal ca3 regions or cornu ammonis 3 area or ca3 field of hippocampus or radiatum ca3 stratum or field hippocampus ca3 or stratum radiatums ca3 or ca3 pyramidal cell layer or lucidums ca3 stratum or region hippocampal ca3 or radiatums ca3 stratum or ca3 stratum pyramidale or ca3 field hippocampus or Dentate Gyrus or ca4 region hippocampal or dentate fascia or cornu ammonis 4 area or hilus gyri dentate or ca4 field of hippocampal formation or ca4 hippocampal sector or gyrus dentate or sector ca4 hippocampal or hippocampal ca4 region or area dentata or region hippocampal ca4 or dentata area or field hippocampal ca4 or gyrus dentatus or hilus of the fascia dentata or hilus of dentate gyrus or dentate gyrus or area dentatas or dentata fascia or hippocampal sector ca4 or hippocampal ca4 field or ca4 of lorente de no or Mossy Fibers, Hippocampal or hippocampal mossy fiber or mossy fibers hippocampal).ab,kw,ti.

5. (hippocampal mossy fibers or mossy fiber hippocampal or Fornix, Brain or hippocampal commissure or hippocampal commissures or commissures dorsal hippocampal or fornix commissures or fornices or brain fimbrias or fornical commissures or fornical commissure or fornix or hippocampal commissures dorsal or commissures hippocampal or fornix-fimbria or hippocampal commissure dorsal or fimbria or fornix fimbria or fimbria of hippocampus or brain fornices or dorsal hippocampal commissure or commissure fornical or commissure dorsal hippocampal or commissure of fornix or commissures fornical or commissure hippocampal or fornix commissure or fimbria-fornix or fimbria fornix or fimbria brain or hippocampus fimbrias or hippocampus fimbria or brain fimbria or Hypothalamus or preoptico-hypothalamic areas or preoptico hypothalamic area or lamina terminalis or hypothalamus or areas preoptico-hypothalamic or area preoptico-hypothalamic or preoptico-hypothalamic area or Hypothalamic Area, Lateral or area hypothalamica laterali or hypothalamica laterali area or hypothalami area lateralis or lateralis area hypothalamica or hypothalamus area lateralis or laterali area hypothalamica or areas lateral hypothalamic or lateralis hypothalami area or lateral hypothalamic areas or accessory nucleus of the ventral horn or lateral tuberal nuclei or tuberal nucleus lateral or lateral hypothalamus or area hypothalamica lateralis or hypothalamus lateral or tuberomammillary nucleus or hypothalamic area lateral or nucleus tuberomammillary or nuclei

lateral tuberal or nucleus lateral hypothalamic or lateralis hypothalamus area or area lateral hypothalamic or hypothalamic nucleus lateral or area lateralis hypothalamus or nucleus lateral tuberal or Hypothalamus, Anterior or commissures anterior hypothalamic or anterior hypothalamic decussation of ganser or hypothalamic commissures anterior or anterior hypothalamic commissures or commissure anterior hypothalamic or periventricular nucleus anteroventral or nucleus anteroventral periventricular or anterior hypothalamic commissure or hypothalamic commissure anterior or hypothalamus anterior or hypothalamus supraoptic or anteroventral periventricular nucleus or anterior hypothalamus or supraoptic hypothalamus or Anterior Hypothalamic Nucleus or areas anterior hypothalamic or hypothalamic area anterior or nucleus anterior hypothalamic or anterior hypothalamic nucleus or hypothalami nucleus anterior or hypothalamic areas anterior or anterior hypothalami nucleus or anterior hypothalamic area or area anterior hypothalamic or nucleus anterior hypothalamus or hypothalamus nucleus anterior or anterior hypothalamic areas or anterior hypothalamus nucleus or nucleus anterior hypothalami or hypothalamic nucleus anterior or Organum Vasculosum or Paraventricular Hypothalamic Nucleus or hypothalamic paraventricular nucleus or paraventricular hypothalamic nucleus or nucleus paraventricular hypothalamic or nucleus hypothalamic paraventricular or nucleus paraventricular or paraventricular nucleus or hypothalamic nucleus paraventricular or paraventricular nucleus hypothalamic or Preoptic Area or area medial preoptic or preoptic area medial or preoptic nucleus or nuclei preoptic or lateral preoptic area or preoptic areas lateral or area preoptic or areas medial preoptic or area lateral preoptic or preoptic areas medial or lateral preoptic areas or preoptica area or nucleus preoptic or medial preoptic areas or areas lateral preoptic or area preoptica or areas preoptic or preoptic nuclei or medial preoptic area or preoptic area or preoptic areas or Suprachiasmatic Nucleus or nucleus suprachiasmatic or suprachiasmatic nucleus or Supraoptic Nucleus or hypothalamus supraoptic nucleus or supraoptic group accessory or accessory supraoptic groups or supraoptic nucleus of hypothalamus or supraopticus nucleus or groups accessory supraoptic or nucleus supraoptic or group accessory supraoptic or accessory supraoptic group or nucleus supraopticus or supraoptic groups accessory or supraoptic nucleus or Hypothalamus, Middle or regions intermediate hypothalamic or hypothalamic region intermediate or region intermediate hypothalamic or middle hypothalamus or hypothalamus medial or hypothalamic regions intermediate or intermediate hypothalamic regions or intermediate hypothalamic region or hypothalamus middle or medial hypothalamus or Arcuate Nucleus of Hypothalamus or nucleus arcuate or arcuate nucleus or hypothalamus arcuate nucleus or nucleus infundibular or infundibular nucleus or arcuate nucleus of hypothalamus or Dorsomedial Hypothalamic Nucleus or nucleus arcuate or arcuate nucleus or hypothalamus arcuate nucleus or nucleus infundibular or infundibular nucleus or arcuate nucleus of hypothalamus or Hypothalamo-Hypophyseal System or hypothalamic pituitary unit or hypothalamo hypophyseal system or hypothalamo-hypophyseal system or hypothalamic-pituitary unit or Median Eminence or eminentia medianas or median eminence or eminentias medianas or eminentia mediana or mediana eminentia or eminence median or median eminence or Pituitary Gland or hypophyseal infundibulum or infundibular hypothalamus or pituitary glands or infundibulum or stalk infundibular or hypothalamus infundibular or infundibulums or pituitary stalks or pituitary gland or hypophysis or pituitary stalk or infundibular stem or stalks infundibular or glands pituitary or hypophysis cerebri or hypophyseal stalks or cerebri hypophysis or stalk hypophyseal or infundibular stalk or infundibular stalks or hypophysis cerebri or hypophyseal stalk or Pituitary Gland, Anterior or lobus anterior or anterior lobe of pituitary or anterior lobus or pituitary pars distalis or anterior pituitary glands or anterior lobus or lobus anterior or pituitary gland anterior or adenohipophyses or pituitary glands anterior or adenohipophysis or pituitary anterior lobe or anterior pituitary gland or pars distalis of pituitary or Corticotrophs or Gonadotrophs or lh producing cells or lh-secreting cells or fsh cells or gonadotrophs or lh cell or fsh-secreting cells or fsh secreting cells or fsh-producing cells or fsh-producing cell or fsh cell or lh-producing cells or fsh producing cells or lh secreting cells or fsh-secreting cell or gonadotroph or lh-producing cell or lh-secreting cell or lh cell or Lactotrophs or pituitary prolactin-secreting cells or lactotrophs or pituitary prolactin cell or prolactin-secreting cell pituitary or prolactin-secreting cells pituitary or lactotroph or prolactin cell pituitary or prolactin cells pituitary or pituitary prolactin cells or pituitary prolactin-secreting cell or pituitary prolactin secreting cells or Somatotrophs or gh cell pituitary or somatotrophs or gh cells pituitary or pituitary growth hormone-secreting cells or pituitary gh cell or pituitary growth hormone secreting cells or pituitary gh cells or somatotroph or Thyrotrophs or Pituitary Gland, Intermediate or Melanotrophs or Pituitary Gland, Posterior or lobes neural or posterior pituitary glands or neural lobe or pituitary pars nervosa or infundibular processes or infundibular process or process infundibular or neurohypophysis or lobe neural or gland posterior pituitary or pituitary posterior lobe or pars nervosa of pituitary or posterior lobe of pituitary or neural lobes or nervosus lobus or lobus nervosus or pituitary gland posterior or processes infundibular or Tuber Cinereum or cinereums tuber or cinereum tuber or tuber cinereum or tuber cinereums or Ventromedial Hypothalamic Nucleus or nucleus ventromedial hypothalamic or hypothalamic nucleus ventromedial or ventromedial hypothalamic nucleus or Hypothalamus, Posterior or posteriors area hypothalamica or area hypothalamica posterior or mammillary regions or region mammillary or nucleus posterior periventricular or hypothalamic regions posterior or hypothalamus posteriors or mammillary region or posterior area hypothalamica or posterior hypothalamic regions or supramammillary commissures or region posterior hypothalamic or supramammillary commissure or regions posterior hypothalamic or posterior hypothalamus or commissures supramammillary or premammillary nucleus or hypothalamic region posterior or posterior hypothalamic region or commissure supramammillary or hypothalamus posterior or hypothalamica posteriors area or periventricular nucleus posterior or

nucleus preammillary or Mammillary Bodies or mammillary bodies or mammillary body or body mammillary or mamillary bodies or body mamillary or bodies mamillary or bodies mammillary or mamillary body or Limbic Lobe or Gyrus Cinguli or gyrus cingular or anterior cingulate gyrus or cingulate gyri posterior or cortex anterior cingulate or posterior cingulate gyrus or cinguli anterior gyrus or mesial region superior or gyrus cingulate or cingulate cortex anterior or cingulate cortex or superior mesial regions or regions cingulate or cortex posterior cingulate or anterior cingulate cortices or posterior cingulates or cingulate bodies or cingulates anterior or cortices anterior cingulate or posterior cingulate cortices or mesial regions superior or posterior cingulate cortex or regions posterior cingulate or cingulate posterior or posterior cingulate region or region posterior cingulate or body cingulate or cortex cingulate or posterior cingulate regions or cingulate gyrus anterior or cingulate gyrus or cingulate gyrus posterior or cingular gyrus or bodies cingulate or cingulate area or anterior cingulates or area cingulate or cingulate regions or regions superior mesial or ingulates posterior or areas cingulate or cingulate cortices anterior or anterior gyrus cinguli or gyri posterior cingulate or gyrus anterior cingulate or gyrus cinguli anterior or cinguli anterior gyrus or superior mesial region or anterior cingulate or gyrus cinguli anterior or cingulate anterior or region cingulate or cingulate areas or Parahippocampal Gyrus or gyrus parahippocampal or gyri parahippocampal or parahippocampal gyri posterior or hippocampal gyrus or gyri posterior parahippocampal or posterior parahippocampal gyrus or gyrus parahippocampalis or parahippocampal gyrus unicus or presubiculum or posterior parahippocampal gyri or gyrus posterior parahippocampal or parahippocampal gyrus posterior or unicus of parahippocampal gyrus or gyri hippocampal or parahippocampal gyrus or presubiculum or gyrus hippocampi or unicus parahippocampal gyrus or gyrus unicus parahippocampal or gyrus hippocampal or parahippocampal gyri or Entorhinal Cortex or area entorhinali or areas entorhinal or entorhinalis area or entorhinal area or area entorhinal or entorhinal cortices or area entorhinalis or cortices entorhinal or entorhinali area or olfactory cortices secondary or secondary olfactory cortex or cortex secondary olfactory or cortices secondary olfactory or entorhinal cortex or olfactory cortex secondary or secondary olfactory cortices or cortex entorhinal or entorhinal areas or Olfactory Pathways or olfactory pathways or pathways olfactory or olfactory pathway or pathway olfactory or Perforant Pathway or pathway perforant or pathways perforant or perforant paths or perforant pathways or perforant pathway or fasciculus perforating or paths perforant or perforant path or perforating fasciculus or path perforant or Septum of Brain or paraterminal body or brain septums or brain septum or septum of brain or paraterminal bodies or area septal or bodies paraterminal or body paraterminal or septal area or region septal or septal region or Septal Nuclei or nucleus of the stria terminalis or septi lateralis nucleus or septal nuclear complices or nucleus of anterior commissure or terminali nucleus striae or laterali nucleus septalis or nucleus lateralis septi or nucleus lateralis septus or nuclear complices septal or septofimbrial nucleus or diagonal band nucleus or nucleus septofimbrial or nucleus septi lateralis or laterali nucleus septi or nucleus triangular septal or medial septal nucleus or nucleus of diagonal band or nucleus septalis lateralis or nucleus striae terminali or nuclear complex septal or septum nucleus lateral or lateral septal nucleus or lateralis nucleus septalis or septal nucleus lateral or septalis laterali nucleus or nuclei septal or anterior commissure nucleus or septus nucleus lateralis or septi laterali nucleus or nucleus medial septum or nucleus septalis laterali or triangularis septus nucleus or lateralis nucleus septi or complex septal nuclear or nucleus striae terminalis or nucleus of stria terminalis or septalis lateralis nucleus or dorsal septal nucleus or nucleus triangularis septus or nucleus lateral septum or nucleus triangularis septi or nucleus lateral septal or septal nucleus triangular or terminalis nucleus striae or septi nucleus lateralis or septi nucleus triangularis or triangular septal nucleus or septus nucleus triangularis or nucleus medial septal or complices septal nuclear or lateralis septus nucleus or medial septum nucleus or lateralis septi nucleus or Substantia Innominata or innominata substantia or substantia innominata or Prosencephalon or prosencephalon or forebrains or forebrain or Diencephalon or diencephalon or interbrain or interbrains or Optic Chiasm or chiasmata optic or optic chiasms or decussation optic or chiasma optic or optic chiasm or optic chiasma or optic decussation or optic chiasma or optic decussations or chiasma opticum or decussations optic or opticum chiasma or optic chiasmata or chiasma opticum or chiasmata optic or chiasm optic or Optic Tract or Subthalamus or subthalamus or fasciculus thalamic or field h nucleus or campi forelus nucleus or fasciculus lenticular or field h1 forel's or campi foreli nucleus or enticular fasciculus or forels field h2 or forel field h2 or thalamicus fasciculus or fasciculus thalamicus or thalamic fasciculus or forelus nucleus campi or nucleus of ansa lenticularis or foreli nucleus campi or nucleus campi forelus or nucleus of field h or forels field h1 or forel's field h2 or field h1 of forel or forel field h1 or Entopeduncular Nucleus or Subthalamic Nucleus or nucleus of luys or luys subthalamic nucleus or corpus luysi or luys body or subthalamic nucleus of luys or subthalamicus nucleus or luys nucleus or nucleus subthalamic or luysi corpus or body of luys or nucleus subthalamicus or subthalamic nucleus or Zona Incerta or Thalamus or thalamencephalon or thalamencephalons or thalamus or Thalamic Nuclei or nuclei thalamic or thalamic nuclei or Anterior Thalamic Nuclei or nucleus anterodorsal thalamic or anterior nuclear group or nucleus anteromedial thalamic or nucleus anteroventral thalamic or thalamus anterior nucleus or anterior thalamic nucleus or nucleus anteroventral or anteroventral nucleus or thalamic nucleus anterodorsal or nuclei anterior thalamic or thalamic nuclei anterior or anteromedial nucleus or anteromedial thalamic nucleus or thalamus anterior or nucleus anteromedial or anterodorsal nucleus or anterior thalamus or anterior thalamic nuclei or anterodorsal thalamic nucleus or nucleus anterodorsal or thalamic nucleus anteroventral or Geniculate Bodies or nucleus geniculate or medial geniculate nucleus or geniculate complex medial or geniculatum mediales corpus or bodies geniculate or nucleus lateral geniculate or mediales corpus geniculatum or geniculate bodies medial or mediale corpus geniculatum or geniculate body or

geniculatum mediale corpus or geniculate nucleus lateral or geniculate bodies or geniculate bodies lateral or metathalamus or corpus geniculatum mediale or geniculate body lateral or complex medial geniculate or nucleus geniculatus lateralis pars dorsalis or geniculate body medial or geniculate complices medial or geniculate nucleus or complices medial geniculate or medial geniculate body or medial geniculate bodies or geniculate nucleus medial or Intralaminar Thalamic Nuclei or nucleus paracentrali or centrum medianum or paracentrali nucleus or centromedian thalamic nucleus or central lateral nucleus or thalamic nucleus parafascicular or central lateral thalamic nucleus or parafascicular thalamic nucleus or thalamic nucleus intralaminar or nucleus central dorsal or parafascicular nucleus of the thalamus or centromedian nucleus or intralaminar nuclei rostral or intralaminar nuclear group or thalamic nucleus centromedian or parafascicularis nucleus or nucleus central lateral or thalamic nuclei intralaminar or central dorsal thalamic nucleus or interlaminar nuclei of thalamus or rostral intralaminar nuclei or thalamus nucleus parafascicularis or centrum medianum nucleus or medianum centrum or thalamic nucleus paracentral or thalamus reticulate nucleus or nucleus paracentral or nucleus central medial or paracentral thalamic nucleus or median nucleus centre or nuclei intralaminar thalamic or nuclei rostral intralaminar or central medial nucleus or nucleus centrum medianum or nucleus centre median or medianum nucleus centrum or nucleus paracentral thalamic or nucleus centromedian thalamic or nucleus parafascicularis thalamus or nucleus intralaminar thalamic or nucleus centrum medianum or nucleus parafascicularis thalami or parafascicularis thalami nucleus or parafascicularis thalamus nucleus or reticulate nuclei of thalamus or nucleus parafasciculari or centrum medianum or centrum medianum nucleus or paracentralis nucleus or lateral nucleus central or parafascicular nucleus or central medial thalamic nucleus or nucleus centromedian or Lateral Thalamic Nuclei or medial pulvinar nucleus or Pulvinar or anterior pulvinar nucleus).ab,kw,ti.

6. (anterior pulvinar nucleus or pulvinar nucleus or nucleus anterior pulvinar or lateral pulvinar nucleus or pulvinar nucleus oral or oral pulvinar nucleus or pulvinar nucleus inferior or pulvinars or pulvinari nucleus or nucleus oral pulvinar or nucleus pulvinar or pulvinar thalami or nucleus pulvinari or nucleus lateral pulvinar or thalami pulvinar or nucleus inferior pulvinar or pulvinaris nucleus or nucleus pulvinaris or pulvinar thalamus or inferior pulvinar nucleus or pulvinar nucleus lateral or Mediodorsal Thalamic Nucleus or medialis dorsali nucleus or medial dorsal thalamic nucleus or mediodorsal nucleus or dorsomedialis thalamus nucleus or nucleus dorsomedial thalamic or nuclei medial thalamic or dorsali nucleus medialis or nucleus mediodorsal or nucleus dorsomedialis thalamus or nucleus medialis dorsali or nucleus mediodorsal thalamic or thalami nucleus dorsomedialis or thalamus nucleus dorsomedialis or thalamic nucleus medial or dorsomedialis thalami nucleus or thalamic nuclei medial or nucleus medial thalamic or mediodorsal thalamic nucleus or nucleus dorsomedial or nucleus medialis dorsalis or thalamic nucleus mediodorsal or dorsal medial nucleus or medialis dorsalis nucleus or nucleus dorsomedialis thalami or medial thalamic nucleus or Midline Thalamic Nuclei or parataenial nucleus or nucleus reunien or rhomboid nucleus or nucleus subfascular or nuclear group midline or paratenial nucleus or rhomboidal nucleus or rhomboid thalamic nucleus or nucleus rhomboid thalamic or reuniens nucleus or subfascular nucleus or thalamus nucleus reuniens or thalami nucleus reuniens or nucleus paraventricular thalamic or reuniens nucleus or reuniens thalami nucleus or paraventricular nucleus of thalamus or paraventricular thalamic nucleus or midline thalamic nucleus or thalamic nuclei midline or paratenial thalamic nucleus or thalamic nucleus rhomboid or periventricular nuclei of thalamus or thalamic nucleus reuniens or reuniens thalamus nucleus or thalamus midline nucleus or nucleus paratenial or thalamus paraventricular nucleus or midline thalamic nuclei or thalamic nucleus subfascular or nucleus reuniens thalamus or thalamic nucleus paratenial or nucleus reuniens or nucleus rhomboid or thalamic nucleus paraventricular or midline nuclear group or Posterior Thalamic Nuclei or supergeniculate nucleus or posterior nuclear complices or nucleus supergeniculate or posterior thalamic nuclei or suprageniculate thalamic nucleus or submedial nucleus or limitans nucleus or thalamic nuclei posterior or nucleus limitans or thalamic nucleus suprageniculate or nucleus submedial or nuclear complices posterior or complices posterior nuclear or posterior nucleus of thalamus or nucleus limitans or nucleus suprageniculate thalamic or posterior thalamic nucleus or posterior thalamic nuclear group or posterior nuclear complex or nuclear complex posterior or thalamus posterior nucleus or Ventral Thalamic Nuclei or posterior nucleus ventral or ventrolateral thalamic nucleus or intermedius nucleus ventralis or ventral posterior nucleus or ventralis intermedius nucleus or ventrobasal complex or ventralis posteromediali nucleus or nuclear mass ventral or group ventral nuclear or ventralis posterolateralis nucleus or nucleus ventral anterior or ventral nuclear groups or laterali nucleus ventralis or nucleus ventral posterolateral or ventralis posterior nucleus or masses ventral nuclear or nucleus ventralis posterolateralis or ventral lateral nucleus or nucleus ventralis intermedius or ventral anterior thalamic nucleus or thalamic nucleus ventral or posterolateralis nucleus ventralis or ventral posteromedial thalamic nucleus or nucleus ventrolateralis thalamus or ventrobasal complices or nucleus ventralis posteromedialis or nuclei ventral thalamic or nucleus ventrolateralis thalami or mass ventral nuclear or ventrolateralis thalami nucleus or ventrolateralis thalamus nucleus or posterolateral nucleus ventral or nuclear group ventral or arcuate nucleus 3 or nucleus ventralis posteriors or ventral posterior thalamic nucleus or ventral posterior medial nucleus or ventral posteroinferior nucleus or posteroinferior nucleus ventral or posteriors nucleus ventralis or arcuate nucleus-3 or thalamus nucleus ventrolateralis or nucleus ventralis or posteromediali or complex ventrobasal or ventral lateral thalamic nucleus or ventral thalamic nuclei or ventral lateral thalamic nuclei or ventral posteromedial nucleus or posteromedialis nucleus ventralis or ventral anterior nucleus or ventral posterolateral nucleus or nuclear masses ventral or ventral posterior inferior thalamic nucleus or thalamic nucleus ventrolateral or ventral nuclear group or thalamus ventrolateral or thalami nucleus ventrolateralis

or posteromedial nucleus ventralis or posterolateralis nucleus ventralis or posterior nucleus ventralis or nucleus ventral posteromedial or nucleus ventralis laterali or ventral posterolateral thalamic nucleus or nucleus ventral thalamic or ventralis lateralis nucleus or ventral nuclear mass or ventralis posterioris nucleus or ventralis laterali nucleus or nucleus ventral posterior or ventral thalamic nucleus or ventrolateral thalamus or nucleus ventralis lateralis or Telencephalon or telencephalon or endbrain or endbrains or Cerebrum or cerebrum or cerebral hemisphere left or cerebral hemisphere right or cerebral hemispheres or right cerebral hemisphere or cerebral hemisphere or left cerebral hemisphere or Basal Ganglia or ganglia basal or nuclei basal or basal ganglia or ganglion basal or basal nuclei or claustrum or Corpus Striatum or lenticular nucleus or nucleus lentiform or lentiformis nucleus or lentiform nucleus or corpus striatum or nucleus lenticular or nucleus lentiformis or lentiform nuclei or striatum corpus or nuclei lentiform or Globus Pallidus or pallidum or paleostriatum or globus pallidus or pallidums or Neostriatum or Caudate Nucleus or nucleus caudatus or caudate nucleus or caudatus nucleus or nucleus caudate or caudatus or High Vocal Center or Putamen or putamens or nucleus putamens or putamens nucleus or putamen nucleus or nucleus putamen or putamen or Ventral Striatum or Nucleus Accumbens or nucleus accumbens or accumbens septus nucleus or accumbens septi nucleus or nucleus accumbens septi or septi nucleus accumbens or accumbens nucleus or septus nucleus accumbens or nucleus accumbens septus or Olfactory Tubercle or Islands of Calleja or Basal Nucleus of Meynert or nucleus basalis of meynert or meynert basal nucleus or nucleus basalis magnocellularis or basal nucleus of meynert or meynert nucleus basalis or Cerebral Cortex or plates cortical or insular cortex or cerebral cortices or archipalliums or paleocortex or allocortices or periallocortices or plate cortical or cerebri cortex or cortices cerebral or paleocortices or cortices insular or insular cortices or cortex insular or periallocortex or archipallium or cortical plates or cortex cerebral or cortex cerebri or reil insula or cortex cerebrus or cortical plate or Frontal Lobe or gyrus anterior central or central gyrus anterior or lobe frontalis or frontal lobe or cortex frontal or gyrus precentralis or frontal eye field or supplementary eye field or gyrus precentrali or frontali lobus or precentrali gyrus or frontal lobes or frontal cortex or field supplementary eye or lobes frontal or eye field supplementary or lobus frontali or supplementary eye fields or frontalis lobus or gyrus precentral or eye fields supplementary or eye fields frontal or anterior central gyrus or fields frontal eye or lobus frontalis or Motor Cortex or motor area or primary motor cortex or motor area precentral or strip motor or somatomotor areas or strips motor or motor cortices primary or premotor areas or motor area secondary or cortex precentral motor or motor area somatic or supplementary motor areas or area primary motor or area premotor or secondary motor area or motor cortices secondary or area motor or secondary motor areas or area somatomotor or motor areas or motor cortex secondary or precentral motor areas or cortices secondary motor or area supplementary motor or motor areas supplementary or area precentral motor or cortices primary motor or precentral motor cortices or areas somatic motor or area somatic motor or areas motor or motor cortex precentral or motor areas precentral or motor strips or cortex primary motor or somatomotor area or premotor area or precentral motor cortex or primary motor area or somatic motor area or motor areas somatic or areas premotor or areas somatomotor or areas precentral motor or areas supplementary motor or motor cortex primary or cortex secondary or motor primary motor cortices or motor cortex or motor cortices precentral or motor area supplementary or cortices precentral motor or somatic motor areas or cortex motor or areas secondary motor or Prefrontal Cortex or orbital gyrus).ab,kw,ti.

7. (gyrus orbital or sulcus olfactory or convolutions superior frontal or orbitofrontal cortices lateral or gyrus frontalis superior or rectal gyrus or cortices ventromedial prefrontal or orbital cortices or cortex orbital or prefrontal cortices ventromedial or inferioris gyrus frontalis or orbital gyri or orbital area or convolution superior frontal or frontalis superioris gyrus or inferior frontal gyrus or gyri orbitofrontal or orbitofrontal regions or frontalis inferioris gyrus or frontal sulcus or prefrontal cortex ventromedial or straight gyrus or cortex lateral orbitofrontal or gyrus frontalis inferior or sulci olfactory or orbital areas or orbitofrontal gyri or area orbital or orbitofrontal region or cortices lateral orbitofrontal or lateral orbitofrontal cortex or superior frontal convolution or cortex orbitofrontal or medial frontal gyrus or gyrus orbitofrontal or gyrus straight or superior frontal gyrus or frontal gyrus medial or ventromedial prefrontal cortex or gyrus rectal or subcallosal area or olfactory sulcus or prefrontal cortex or superior frontal convolutions or sulcus frontal or olfactory sulci or region orbitofrontal or superioris gyrus frontalis or superior gyrus frontalis or gyrus superior frontal or orbitofrontal cortex or frontal gyrus inferior or gyrus frontalis inferioris or cortex ventromedial prefrontal or marginal gyrus or rectus gyrus or orbital cortex or gyrus medial frontal or orbitali gyrus or orbitofrontal gyrus or inferior gyrus frontalis or frontal gyrus superior or gyri orbital or areas orbital or cortex prefrontal or cortices orbital or gyrus rectus or frontalis superior gyrus or lateral orbitofrontal cortices or orbitofrontal cortices or gyrus frontalis superioris or orbitofrontal cortex lateral or gyrus marginal or Broca Area or Neocortex or neocortical molecular layer or neocortices cerebral or isocortex or cerebral neocortices or neopalliums or corticalis substantia or multiform layer neocortical or neocortical multiform layer or layer neocortical molecular or cortices neopallial or neopallial cortex or neocortical internal pyramidal layer or molecular layer neocortical or neopallial cortices or cortex neopallial or layers neocortical multiform or neocortex cerebral or molecular layers neocortical or neocortical internal granular layer or neocortical multiform layers or cerebral neocortex or neocortical external pyramidal layer or neocortical molecular layers or isocortices or external granular layer or substantia corticali or corticali substantia or layer neocortical multiform or multiform layers neocortical or Occipital Lobe or occipital cortex or cuneus or gyrus annectant or sulcus lunatus or gyrus lingual or gyrus occipital or calcarine fissures or regions occipital or occipitotemporal gyrus medial or sulcus calcarine or lunatus sulcus or occipital lobe or gyrus medial

occipitotemporal or cuneate lobule or region occipital or fissures calcarine or calcarinus sulcus or sulcus calcarinus or lobe occipital or lobes occipital or occipital region or gyrus lingualis or occipital gyrus or annectant gyrus or occipital regions or lobules cuneate or occipital sulcus or cortices occipital or calcarine sulcus or fissure calcarine or lingual gyrus or lobule cuneate or cortex cuneus or linguali gyrus or Visual Cortex or primary visual cortices or visual cortex primaries or primaries visual cortex or cortices extrastriate or visual cortices primary or extrastriate cortices or cortex primaries visual or cortex primary visual or striate cortex or cortices primary visual or visual cortex primary or visual cortex or cortex striate or cortex extrastriate or cortex visual or extrastriate cortex or primary visual cortex or Olfactory Cortex or Basal Forebrain or Piriform Cortex or sulcus intraparietal or regions parietal or lobes parietal or paracentral lobules posterior or gyrus supramarginal or precuneus cortices or parietal cortex or gyrus angulari or praecuneus or gyrus angularis or gyrus supramarginali or parietal regions or gyrus prelunate or lobules parietal or lobe parietal or parietal cortices posterior or gyrus supramarginalis or angulari gyrus or supramarginali gyrus or marginal sulcus or posterior parietal cortex or prelunate gyrus or posterior parietal cortices or intraparietal sulcus or angularis gyrus or region parietal or parietal lobules or precuneus or cortex parietal or gyrus angular or precuneus cortex or lobule parietal or parietal lobule or cortices precuneus or posterior paracentral lobule or lobules posterior paracentral or sulcus marginal or posterior paracentral lobules or Parietal Lobe or sulcus intraparietal or regions parietal or lobes parietal or paracentral lobules posterior or gyrus supramarginal or precuneus cortices or parietal cortex or gyrus angulari or praecuneus or gyrus angularis or gyrus supramarginali or parietal regions or gyrus prelunate or lobules parietal or lobe parietal or parietal cortices posterior or gyrus supramarginalis or angulari gyrus or supramarginali gyrus or marginal sulcus or posterior parietal cortex or prelunate gyrus or posterior parietal cortices or intraparietal sulcus or angularis gyrus or region parietal or parietal lobules or precuneus or cortex parietal or gyrus angular or precuneus cortex or lobule parietal or parietal lobule or cortices precuneus or posterior paracentral lobule or lobules posterior paracentral or sulcus marginal or posterior paracentral lobules or omatosensory Cortex or postcentral gyrus or somatosensory cortices primary or somatosensory cortex primary or cortex anterior parietal or cortices anterior parietal or cortices primary somatosensory or anterior parietal cortices or cortex secondary sensory or areas primary somatosensory or primary somatosensory cortices or cortex si or gyrus post central or secondary somatosensory areas or post central gyrus or parietal cortices anterior or gyrus postcentrali or secondary somatosensory cortex or somatosensory cortex or areas secondary somatosensory or somatosensory cortex secondary or area primary somatosensory or postcentralis gyrus or cortices secondary sensory or secondary sensory cortex or primary somatosensory cortex or somatosensory areas secondary or si cortex or primary somatosensory areas or secondary somatosensory cortices or gyrus postcentralis or area secondary somatosensory or primary somatosensory area or cortex primary somatosensory or secondary somatosensory area or secondary sensory cortices or cortices secondary somatosensory or primary somatic sensory area or postcentrali gyrus or gyrus postcentral or Wernicke Area or Sensorimotor Cortex or Auditory Cortex or gyrus transverse temporal or auditory areas temporal or temporal auditory areas or areas auditory or cortex primary auditory or transverse temporal gyrus or cortex auditory or auditory areas or transverse temporal gyri or convolutions heschl's or auditory cortex or auditory area or auditory cortex primary or auditory cortices primary or areas temporal auditory or area auditory or gyri transverse temporal or primary auditory cortices or heschl gyri or heschl convolutions or temporal gyri transverse or auditory area temporal or temporal auditory area or heschls gyri or primary auditory cortex or Temporal Lobe or temporal operculums or superior temporal gyrus or occipito-temporal gyrus lateral or gyrus fusiform or gyrus lateral occipito-temporal or gyrus temporalis superior or occipitotemporal gyrus or horns temporal or inferior horn of lateral ventricle or temporal sulcus or regions temporal or operculums temporal or cortex temporal or lobes temporal or planum polares or temporalis superior gyrus or gyrus superior temporal or horn temporal or lobe temporal or temporal horn or temporal cortices or gyrus lateral occipitotemporal or temporalis superiors gyrus or region temporal or fusiformi gyrus or temporal region or temporal horns or lateral occipito-temporal gyrus or temporal cortex or gyrus temporal or temporal operculum or temporal regions or operculum temporal or cortices temporal or temporal horn of the lateral ventricle or polare planum or fusiformis gyrus or sulcus temporal or polares planum or planum polare or temporal lobe or Diagonal Band of Broca or diagonal band of broca or broca diagonal band or External Capsule or olfactory tracts or olfactory tract lateral or main olfactory bulbs or bulbs main olfactory or bulb olfactory or glomerulus olfactory or lateral olfactory tracts or olfactory tract or bulb main olfactory or olfactory bulbs or olfactory bulb main or accessory olfactory bulb or accessory olfactory bulbs or tracts olfactory or bulbs accessory olfactory or olfactory glomerulus or bulbs olfactory or olfactory bulb accessory or tract olfactory or bulb accessory olfactory or tract lateral olfactory or olfactorius bulbus or olfactory bulb or lateral olfactory tract or Olfactory Bulb or olfactory tracts or olfactory tract lateral or main olfactory bulbs or bulbs main olfactory or bulb olfactory or glomerulus olfactory or lateral olfactory tracts or olfactory tract or bulb main olfactory or olfactory bulbs or olfactory bulb main or accessory olfactory bulb or accessory olfactory bulbs or tracts olfactory or bulbs accessory olfactory or olfactory glomerulus or bulbs olfactory or olfactory bulb accessory or tract olfactory or bulb accessory olfactory or tract lateral olfactory or olfactorius bulbus or olfactory bulb or lateral olfactory tract or Telencephalic Commissures or Anterior Cerebellar Commissure or Corpus Callosum or corpus callosums or commissures neocortical or neocortical commissures or corpus callosum or callosums corpus or interhemispheric commissure or interhemispheric commissures or neocortical commissure or callosum corpus or commissures interhemispheric or

commissure interhemispheric or commissure neocortical or Internal Capsule or internal capsules or interna capsula or capsules internal or capsule internal or capsula internas or internal capsule or capsula interna or internas capsula or Myelencephalon).ab,kw,ti.

8. exp brain/

9. 4 or 5 or 6 or 7 or 8

10. exp nervous system inflammation/

11. exp glia/

12. exp astrocyte/

13. exp leukocyte/

14. exp antigen presenting cell/

15. exp leukocyte antigen/

16. (Inflammat\* or Eicosanoid\* or Leukotriene\* or lta4 or lta 4 or ltb4 or ltb 4 or 512-hete or 512 dihete or SRS-A or ltc4 or ltd4 or lte4 or Prostaglandin\* or prostanoid\* or pgg or pgh2 or pga or pgb or pgd or pgd2 or pge or pge2 or pgf or pgf2 or Alprostadi1 or Dinoprostone or pgf\* or Dinoprost or 6-Ketoprostaglandin F1 alpha or Epoprostenol or prostacyclin\* or Thromboxane\* or Histamine\* or eplene or Kinin\* or Bradykinin\* or Kallidin or Kininogen\* or Tachykinin\* or prekinins or thioastatin or prokinins or Eledoisin or Kassinin or Neurokinin\* or Physalaemin or Substance P or Urotensin\* or thrombocyte aggregating activity or paf acether or factor platelet activating or 1-alkyl-2-acetyl-sn-glycerophosphocholine or platelet aggregation enhancing factor or 1 alkyl 2 acetyl sn glycerophosphocholine or platelet activating factor or acetyl glyceryl ether phosphorylcholine or platelet activating substance or agepe or paf-acether or platelet-activating substance or platelet aggregating factor or phosphorylcholine acetyl glyceryl ether or aggregating factor platelet or Platelet Activating Factor or Chemokine\* or cytokine\* or intercrine\* or beta-Thromboglobulin or CCL1 or CCL3 or CCL4 or CCL5 or CCL11 or CCL17 or CCL19 or CCL20 or CCL21 or CCL22 or CCL24 or CCL27 or Monocyte Chemoattractant Protein\* or CCL2 or CCL7 or CCL8 or CXCL1 or CXCL2 or CXCL5 or CXCL6 or CXCL9 or CXCL10 or CXCL11 or CXCL12 or CXCL13 or Interleukin\* or Platelet Factor 4 or CX3C or CX3CL1 or Macrophage Inflammatory Proteins or CCL3 or CCL19 or CCL20 or CXCL2 or mip 2 or mip2alpha or chemokine mip-2 or mip 2alpha or inflammatory protein-2alpha macrophage or ldncf-2 or mip-3-alpha or interferon\* or ifn or lymphokine\* or lymphocyte mediators or monokine\* or tumor necrosis factor\* or tnf or Oncostatin M or Leukemia Inhibitory Factor or Transforming Growth Factor or tgf or tgfbeta or Astrocyte\* or astroglia\* or glia\* or microglia or epithelioid cell\* or Macrophage\* or monocyte\* or histiocyte\* or neutrophil\* or cells le or le cell or leukocyte polymorphonuclear or Antibody\* producing cell\* or antibody\* secreting cell\* or immunoglobulin\* producing cell\* or immunoglobulin\* secreting cell\* or bursa-dependent or b-cell or bcell or granulocyte or Antigen presenting cell\* or dendritic cell\* or interdigitating cell\* or veiled cell\* or Lymphocyte\* or leukocyte\* or lymphoid cell\* or t-cell\* or t-lymphocyte\* or t cell\* or t lymphocyte\* or th1 cell\* or th2 cell\* or th17 cell\* or treg or tregs or th3 cell\* or tr1 cell\* or t8 cell\* or tc2 cell\* or tc1 cell\* or lympholytic cell\* or nkt cell\* or inkt cell\* or t helper or t cytotoxic or t regulatory or epidermal cell derived thymocyte activating factor or il-1 or il1 or il-2 or il2 or ru49637 or ro-23-6019 or ru 49637 or ro236019 or ru-49637 or ro 236019 or ro-236019 or thymocyte stimulating factor or tcgf or ro 23 6019 or eosinophil-mast cell growth-factor or colony-stimulating factor multipotential or erythrocyte burst-promoting factor or burst-promoting factor erythrocyte or hematopoietin 2 or colony stimulating factor mast cell or eosinophil mast cell growth factor or p cell stimulating factor or colony-stimulating factor 2 alpha or p-cell stimulating factor or mast-cell colony-stimulating factor or multipotential colony stimulating factor or erythrocyte burst promoting factor or il-3 or il3 or colony-stimulating factor mast-cell or multipotential colony-stimulating factor or burst promoting factor erythrocyte or colony stimulating factor multipotential or mast cell growth factor 2 or binetrakin or mcgf-2 or bcgf-1 or il-4 or il4 or b-cell growth factor-1 or bsf-1 or il 5 or il5 or t-cell replacing factor or differentiation factor eosinophil or eosinophil differentiation factor or bcgf-ii or growth factor hybridoma or il6 or il 6 or hybridoma growth factor or growth factor plasmacytoma or plasmacytoma growth factor or bsf-2 or hepatocyte-stimulating factor or mgi-2 or myeloid differentiation inducing protein or differentiation-inducing protein myeloid or ifn-beta 2 or myeloid differentiation-inducing protein or lymphopoietin-1 or lymphopoietin 1 or il7 or il-7 or il8 or il 8 or cxcl8 or amcf-1 or il9 or il 9 or il10 or il 10 or csif-10 or il 11 or il11 or inhibitory factor adipogenesis or adipogenesis inhibitory factor or factor adipogenesis inhibitory or il12 or il 12 or edodekin alfa or il13 or il 13 or il 15 or il15 or il16 or il 16 or lcf factor or il 17 or il17 or il 17e or il 17f or il 17c or il 17a or il 17b or il18 or il-18 or il23 or il 23 or il27 or il 27 or il-17d or CD 11 or CD11 or CD 11b or CD11b or CD68 or CD40 or CD45 or Ox-42 or OX42 or ed-1 or ed1 or cd200 or cd 200 or Iba 1 or Iba1 or ly6g or cd3 or mpo or mcp1 or mcp-1 or ccr2 or arg1 or arg 1 or mhc or major histocompatibility complex or aldh1 or aldh 1 or hla dr or cd20 or nf kb or nfkb or calproectin or enkapalin or COX or COX2 or COX1 or cPLA2 or iPLA2 or sPLA2 or txa2 or tx a2 or txb2 or tx b2 or lta4 or lt a4 or ltb4 or lt b4 or resolving or protectin or maresin or 6 ketoPGF or 6ketoPGF or lipoxygenase or LOX or 12 lox or 12lox or 15 lox or 15lox or 5 lox or 5lox or COX or COX2 or COX1 or cPLA2 or iPLA2 or sPLA2 or txa2 or tx a2 or txb2 or tx b2 or lta4 or lt a4 or ltb4 or lt b4 or resolving or protectin or maresin or 6-ketoPGF or 6ketoPGF or lipoxygenase or LOX or 12-lox or 12lox or 15-lox or 15lox or 5-lox or 5lox or iNOS or RELB or mPGES or tnf-a or tnfa or il1a or il1 a or il1b or il1 b or s100\* or kynuren\*).ab,kw,ti.

17. (animal not human).mp. [mp=title, abstract, heading word, drug trade name, original title, device manufacturer, drug manufacturer, device trade name, keyword]
18. exp neurogenic inflammation/
19. exp cytokine/
20. exp chemokine/
21. exp autacoid/
22. exp lymphocyte/
23. exp lymphocyte/
24. exp mast cell/
25. exp complement/
26. exp complement/
27. exp complement system/
28. exp prostaglandin synthase/
29. exp prostanoid/ or "prostaglandins,thromboxanes and leukotrienes"/
30. exp icosanoid/
31. exp cytosolic phospholipase A2/
32. exp calcium independent phospholipase A2/
33. exp histamine/
34. exp arachidonate 15 lipoxygenase/ or exp arachidonate 12 lipoxygenase/ or exp lipoxygenase/ or exp arachidonate 5 lipoxygenase/
35. immunoglobulin/ or exp "antibodies,antisera and immunoglobulins"/
36. (nissl or gliosis).ti,ab,kw.
37. 10 or 11 or 12 or 13 or 14 or 15 or 16 or 18 or 19 or 20 or 21 or 22 or 23 or 24 or 25 or 26 or 27 or 28 or 29 or 30 or 31 or 32 or 33 or 34 or 35 or 36
38. 3 and 9 and 37
39. 38 not 17
40. limit 39 to (conference abstract or conference paper or conference proceeding or "conference review" or editorial)
41. limit 39 to "review"
42. 40 or 41
43. 39 not 42

| ID | Search Terms                                                                                                                                             | Results     | Search Type     | Actions                   |
|----|----------------------------------------------------------------------------------------------------------------------------------------------------------|-------------|-----------------|---------------------------|
| 36 | (nissl or gliosis).ti,ab,kw.                                                                                                                             | 13861       | Advanced        | Display, More >           |
| 37 | 10 or 11 or 12 or 13 or 14 or 15 or 16 or 18 or 19 or 20 or 21 or 22 or 23 or 24 or 25 or 26 or 27 or 28 or 29 or 30 or 31 or 32 or 33 or 34 or 35 or 36 | 4514834     | Advanced        | Display, More >           |
| 38 | 3 and 9 and 37                                                                                                                                           | 17412       | Advanced        | Display, More >           |
| 39 | 38 not 17                                                                                                                                                | 14471       | Advanced        | Display, More >           |
| 40 | limit 39 to (conference abstract or conference paper or conference proceeding or "conference review" or editorial)                                       | 4277        | Advanced        | Display, More >           |
| 41 | limit 39 to "review"                                                                                                                                     | 3533        | Advanced        | Display, More >           |
| 42 | 40 or 41                                                                                                                                                 | 7772        | Advanced        | Display, More >           |
| 43 | <b>39 not 42</b>                                                                                                                                         | <b>6699</b> | <b>Advanced</b> | <b>Display, More &gt;</b> |

Remove Selected | Save Selected | Combine selections with:  And  Or  RSS | Save Search History

Advanced Search | Basic Search | Find Citation | Search Tools | Search Fields | Multi-Field Search

1 Resource selected | Hide | Change  
 Embase Classic+Embase 1947 to 2015 October 13

Enter keyword or phrase (\* or \$ for truncation)    Keyword  Author  Title  Journal





## Results of Search October 14<sup>th</sup> 2014 Medline EXP - 3302

1. exp Brain/
2. exp Inflammation Mediators/
3. exp Neuroglia/
4. exp Leukocytes/
5. exp Antibody-Producing Cells/
6. exp Antigen-Presenting Cells/
7. exp Cytokines/
8. exp Antigens, CD/
9. exp Neurogenic Inflammation/
10. 2 or 3 or 4 or 5 or 6 or 7 or 8 or 9
11. exp Alzheimer Disease/
12. exp Dementia/
13. 11 or 12
14. (animal not human).mp. [mp=title, abstract, original title, name of substance word, subject heading word, keyword heading word, protocol supplementary concept word, rare disease supplementary concept word, unique identifier]
15. 1 and 10 and 13
16. 15 not 14

| <input type="checkbox"/> | 10 | 2 or 3 or 4 or 5 or 6 or 7 or 8 or 9                                                                                                                                                                                             | ▶ | 1560273 | Advanced | Display More >        |
|--------------------------|----|----------------------------------------------------------------------------------------------------------------------------------------------------------------------------------------------------------------------------------|---|---------|----------|-----------------------|
| <input type="checkbox"/> | 11 | exp Alzheimer Disease/                                                                                                                                                                                                           | ▶ | 74367   | Advanced | Display More >        |
| <input type="checkbox"/> | 12 | exp Dementia/                                                                                                                                                                                                                    | ▶ | 131533  | Advanced | Display More >        |
| <input type="checkbox"/> | 13 | 11 or 12                                                                                                                                                                                                                         | ▶ | 131533  | Advanced | Display More >        |
| <input type="checkbox"/> | 14 | (animal not human).mp. [mp=title, abstract, original title, name of substance word, subject heading word, keyword heading word, protocol supplementary concept word, rare disease supplementary concept word, unique identifier] | ▶ | 683521  | Advanced | Display Delete More > |
| <input type="checkbox"/> | 15 | 1 and 10 and 13                                                                                                                                                                                                                  | ▶ | 3805    | Advanced | Display More >        |
| <input type="checkbox"/> | 16 | 15 not 14                                                                                                                                                                                                                        | ▶ | 3302    | Advanced | Display More >        |

Remove Selected Save Selected Combine selections with:  And  Or

Advanced Search | Basic Search | Find Citation | Search Tools | Search Fields | Multi-Field Search

2 Resources selected | [Hide](#) | [Change](#)

**Ovid MEDLINE(R)** 1946 to October Week 1 2015, **Ovid MEDLINE(R) In-Process & Other Non-Indexed Citations** October 13, 2015

Enter keyword or phrase  Keyword  Author  Title  Journal

(\* or \$ for truncation)

▼ Limit: (clear)  Include Multimedia  Map Term to Subject Heading

4:43 PM 14/10/2015

## Medline Search KW Oct 14<sup>th</sup> 2015 – 9403 results

1. "dement\*".ab,kw,ti.
2. "amentia\*".ab,kw,ti.
3. (nissl or gliosis or Inflammat\* or Eicosanoid\* or Leukotriene\* or lta4 or lta 4 or ltb4 or ltb 4 or 512-hete or 512 dihete or SRS-A or ltc4 or ltd4 or lte4 or Prostaglandin\* or prostanoid\* or pgg or pgh2 or pga or pgb or pgd or pgd2 or pge or pge2 or pgf or pgf2 or Alprostadil or Dinoprostone or pgf\* or Dinoprost or 6-Ketoprostaglandin F1 alpha or Epoprostenol or prostacyclin\* or Thromboxane\* or Histamine\* or eplene or Kinin\* or Bradykinin\* or Kallidin or Kininogen\* or Tachykinin\* or prekinins or thioastatin or prokinins or Eledoisin or Kassinin or Neurokinin\* or Physalaemin or Substance P or Urotensin\* or thrombocyte aggregating activity or paf acether or factor platelet activating or 1-alkyl-2-acetyl-sn-glycerophosphocholine or platelet aggregation enhancing factor or 1 alkyl 2 acetyl sn glycerophosphocholine or platelet activating factor or acetyl glyceryl ether phosphorylcholine or platelet activating substance or agepc or paf-acether or platelet-activating substance or platelet aggregating factor or phosphorylcholine acetyl glyceryl ether or aggregating factor platelet or Platelet Activating Factor or Chemokine\* or cytokine\* or intercrine\* or beta-Thromboglobulin or CCL1 or CCL3 or CCL4 or CCL5 or CCL11 or CCL17 or CCL19 or CCL20 or CCL21 or CCL22 or CCL24 or CCL27 or Monocyte Chemoattractant Protein\* or CCL2 or CCL7 or CCL8 or CXCL1 or CXCL2 or CXCL5 or CXCL6 or CXCL9 or CXCL10 or CXCL11 or CXCL12 or CXCL13 or Interleukin\* or Platelet Factor 4 or CX3C or CX3CL1 or Macrophage Inflammatory Proteins or CCL3 or CCL19 or CCL20 or CXCL2 or mip 2 or mip2alpha or chemokine mip-2 or mip 2alpha or inflammatory protein-2alpha macrophage or ldnf-2 or mip-3-alpha or interferon\* or ifn or lymphokine\* or lymphocyte mediators or monokine\* or tumor necrosis factor\* or tnf or Oncostatin M or Leukemia Inhibitory Factor or Transforming Growth Factor or tgf or tgfbeta or Astrocyte\* or astroglia\* or glia\* or microglia or epithelioid cell\* or Macrophage\* or monocyte\* or histiocyte\* or neutrophil\* or cells le or le cell or leukocyte polymorphonuclear or Antibody\* producing cell\* or antibody\* secreting cell\* or immunoglobulin\* producing cell\* or immunoglobulin\* secreting cell\* or bursa-dependent or b-cell or bcell or granulocyte or Antigen presenting cell\* or dendritic cell\* or interdigitating cell\* or veiled cell\* or Lymphocyte\* or leukocyte\* or lymphoid cell\* or t-cell\* or t-lymphocyte\* or t cell\* or t lymphocyte\* or th1 cell\* or th2 cell\* or th17 cell\* or treg or tregs or th3 cell\* or tr1 cell\* or t8 cell\* or tc2 cell\* or tc1 cell\* or lympholytic cell\* or nkt cell\* or inkt cell\* or t helper or t cytotoxic or t regulatory or epidermal cell derived thymocyte activating factor or il-1 or il1 or il-2 or il2 or ru49637 or ro-23-6019 or ru 49637 or ro236019 or ru-49637 or ro 236019 or ro-236019 or thymocyte stimulating factor or tcgf or ro 23 6019 or eosinophil-mast cell growth-factor or colony-stimulating factor multipotential or erythrocyte burst-promoting factor or burst-promoting factor erythrocyte or hematopoietin 2 or colony stimulating factor mast cell or eosinophil mast cell growth factor or p cell stimulating factor or colony-stimulating factor 2 alpha or p-cell stimulating factor or mast-cell colony-stimulating factor or multipotential colony stimulating factor or erythrocyte burst promoting factor or il-3 or il3 or colony-stimulating factor mast-cell or multipotential colony-stimulating factor or burst promoting factor erythrocyte or colony stimulating factor multipotential or mast cell growth factor 2 or binetrakin or mcgf-2 or bcgf-1 or il-4 or il4 or b-cell growth factor-1 or bsf-1 or il 5 or il5 or t-cell replacing factor or differentiation factor eosinophil or eosinophil differentiation factor or bcgf-ii or growth factor hybridoma or il6 or il 6 or hybridoma growth factor or growth factor plasmacytoma or plasmacytoma growth factor or bsf-2 or hepatocyte-stimulating factor or mgi-2 or myeloid differentiation inducing protein or differentiation-inducing protein myeloid or ifn-beta 2 or myeloid differentiation-inducing protein or lymphopoietin-1 or lymphopoietin 1 or il7 or il-7 or il8 or il 8 or cxcl8 or amcf-I or il9 or il 9 or il10 or il 10 or csif-10 or il 11 or il11 or inhibitory factor adipogenesis or adipogenesis inhibitory factor or factor adipogenesis inhibitory or il12 or il 12 or edodekin alfa or il13 or il 13 or il 15 or il15 or il16 or il 16 or lcf factor or il 17 or il17 or il 17e or il 17f or il 17c or il 17a or il 17b or il18 or il-18 or il23 or il 23 or il27 or il 27 or il-17d or CD 11 or CD11 or CD 11b or CD11b or CD68 or CD40 or CD45 or Ox-42 or OX42 or ed-1 or ed1 or cd200 or cd 200 or Iba 1 or Iba1 or ly6g or cd3 or mpo or mcp1 or mcp-1 or ccr2 or arg1 or arg 1 or mhc or major histocompatibility complex or aldh1 or aldh 1 or hla dr or cd20 or nf kb or nfkb or calproectin or enkaphalin or COX or COX2 or COX1 or cPLA2 or iPLA2 or sPLA2 or txa2 or tx a2 or txb2 or tx b2 or lta4 or lt a4 or ltb4 or lt b4 or resolving or protectin or maresin or 6 ketoPGF or 6ketoPGF or lipoxygenase or LOX or 12 lox or 12lox or 15 lox or 15lox or 5 lox or 5lox or COX or COX2 or COX1 or cPLA2 or iPLA2 or sPLA2 or txa2 or tx a2 or txb2 or tx b2 or lta4 or lt a4 or ltb4 or lt b4 or resolving or protectin or maresin or 6-ketoPGF or 6ketoPGF or lipoxygenase or LOX or 12-lox or 12lox or 15-lox or 15lox or 5-lox or 5lox or iNOS or RELB or mPGES or tnf-a or tnfa or il1a or il1 a or il1b or il1 b).ab,kw,ti.
4. (Brain\* or hippocamp\* or encephalon or Blood Brain Barrier or hemato-encephalic barriers or barriers brain-blood or hemato-encephalic barrier or barriers hemato-encephalic or barrier hemato-encephalic or hemato-encephalic barrier or truncus cerebri or truncus cerebri or cerebri truncus or brainstems or cerebri truncus or Mesencephalon or mesencephalon or mesencephalons or midbrains or midbrain or Cerebral Peduncle or Cerebral Crus or Substantia Nigra or nigras substantia or nigra substantia or substantia nigras or Pars Compacta or Pars Reticulata or Tegmentum Mesencephali or midbrain trigeminal nucleus or nucleus peripeduncular or annulari nucleus or nervi trochlearis nucleus or midbrain tegmentum or mesencephalus tegmentum or tegmental nucleus ventral or

mesencephalic tegmentums or midbrain tegmentums or trigeminal nucleus mesencephalic or tegmentums midbrain or trochlearis nucleus nervi or nucleus annularis or trigeminal nucleus midbrain or nucleus annular or mesencephali tegmentum or darkshevichs nucleus or tegmentums mesencephalic or ventral tegmental nucleus or mesencephalic trigeminal nucleus or nervi trochleari nucleus or nucleus darkshevich's or darkschewitsch nucleus or tegmentum of midbrain or nucleus annulari or cajal interstitial nucleus or mesencephalic tegmentum or nuclei accessory oculomotor or trochlear nucleus or annularis nucleus or nucleus mesencephalic trigeminal or nucleus of darkschewitschor peripeduncular nucleus or oculomotor nuclei accessory or tegmentum midbrain or tegmentum mesencephali or nucleus nervi trochlearis or darkshevich nucleus or nucleus tractus mesencephalici nervi trigemini or interstitial nucleus of cajal or Cerebral Aqueduct or ducts mesencephalic or mesencephalic ducts or aqueduct mesencephalic or sylvian aqueducts or duct mesencephalic or sylvius aqueduct or cerebrus aqueductus or aqueductus cerebrus or cerebral aqueduct or aqueduct sylvian or aqueduct of sylvius or mesencephalic duct or cerebral aqueducts or aqueducts sylvian or aqueduct cerebral or sylvian aqueduct or aqueductus cerebri or aqueducts mesencephalic or cerebri aqueductus or mesencephalic aqueduct or Midbrain Reticular Formation or Pedunculopontine Tegmental Nucleus or nucleus tegmentalis pedunculopontinus or nucleus pedunculopontine tegmental or tegmental nucleus pedunculopontine or pedunculopontine tegmental nucleus or Oculomotor Nuclear Complex or Edinger-Westphal Nucleus or Periaqueductal Grey or greys central periaqueductal or griseum centrales or central grey substance of midbrain or periaqueductal greys central or grey matter periaqueductal or grey central periaqueductal or substantia grisea centralis or periaqueductal grey matter or central periaqueductal grey or grisea centralis substantia or periaqueductal grey or centrale mesencephali griseum or centrale mesencephalus griseum or centrale griseum or grey matters periaqueductal or centrales griseum or periaqueductal grey central or substantia grisea centralis mesencephali or mesencephalus griseum central or midbrain central grey or central grey mesencephalic or central periaqueductal greys or central grey midbrain or griseum centrale mesencephali or Raphe Nuclei or nucleus incertus or nucleus superior central or nuclei raphe or nucleus interfascicular or superior central nucleus or raphe nuclei or interfascicular nucleus or raphe nucleus or incertus nucleus or central nucleus superior or rostral linear nucleus of the raphe or caudal linear nucleus of the raphe or rostral linear nucleus of raphe or nucleus raphe or Dorsal Raphe Nucleus or Interpeduncular Nucleus or Midbrain Raphe Nuclei or Red Nucleus or nucleus ruber or red nucleus or nucleus red or Ventral Tegmental Area or tegmentalis ventralis area or tegmentalis ventrali area or area tegmentalis ventralis or ventral tegmental area of tsai or ventral tegmental area or tegmental area ventral or area tegmentalis ventrali or Locus Coeruleus or coeruleus complex locus or complices locus coeruleus or locus caeruleus or complex locus ceruleus or complices locus ceruleus or coeruleus complices locus or ceruleus complex locus or locus ceruleus complex or complex locus coeruleus or locus ceruleus complices or locus ceruleus or nucleus pigmentosus pontis or locus coeruleus complices or pontis nucleus pigmentosus or ceruleus complices locus or locus coeruleus or locus coeruleus complex or Tectum Mesencephali or corpora quadrigemina or inferior colliculus commissures or colliculus commissures superior or colliculus commissures inferior or quadrigeminal plates or superior colliculus commissure or plate quadrigeminal or commissure of superior colliculus or quadrigemina corpora or commissure of inferior colliculus or lamina quadrigemina or inferior colliculus commissure or colliculus commissure inferior or quadrigeminal plate or tectum mesencephalus or mesencephalus tectum or plates quadrigeminal or quadrigemina lamina or colliculus commissure superior or Inferior Colliculi or colliculi inferior or inferior colliculi or inferiors colliculus or posterior colliculus or brachial nucleus of the inferior colliculus or caudal colliculus or colliculus inferiors or colliculus caudal or inferior colliculus or colliculus posterior or colliculus inferior or Subcommissural Organ or subcommissural organs or subcommissural organ or organs subcommissural or organ subcommissural or Superior Colliculi or mammalian optic lobes or optic lobe mammalian or optic tectums or superior colliculi or optic tectum or anterior colliculus or colliculus superior or human optic lobes or superior colliculus or optic lobes human or optic lobes mammalian or optic lobe human or colliculi superior or tectum optic or tectums optic or mammalian optic lobe or human optic lobe or colliculus anterior or Reticular Formation or formations reticular or reticular formation or reticular formations or formation reticular or edunculopontine Tegmental Nucleus or nucleus tegmentalis pedunculopontinus or nucleus pedunculopontine tegmental or tegmental nucleus pedunculopontine or pedunculopontine tegmental nucleus or Respiratory Center or centers respiratory or respiratory centers or center respiratory or respiratory center or rhombencephalon or hind brains or brains hind or rhombencephalons or hindbrain or hindbrains or brain hind or rhombencephalon or hind brain or Medulla Oblongata or medulla oblongata or nucleus ambiguous or arcuate nucleus-1 or accessory cuneate nucleus or nucleus external cuneate or cuneate nucleus accessory or nucleus ambiguous or medulla oblongatas or arcuate nucleus of the medulla or cuneate nucleus lateral or nucleus lateral cuneate or ambiguous nucleus or cuneate nucleus external or arcuate nucleus 1 or external cuneate nucleus or ambiguous nucleus or arcuate nucleus-1s or lateral cuneate nucleus or Area Postrema or area postremas or trigger zone chemoreceptor or chemoreceptor trigger zone or chemoreceptor trigger zones or trigger zones chemoreceptor or zone chemoreceptor trigger or postrema area or zones chemoreceptor trigger or area postrema or Olivary Nucleus or nucleus basalis olivary or nucleus olivary or basalis olivary nucleus or nucleus olivary basal or olivary basal nucleus or basal nucleus olivary or olivary nucleus or Raphe nuclei or nucleus incertus or nucleus superior central or nuclei raphe or nucleus interfascicular or superior central nucleus or raphe nuclei or interfascicular nucleus or raphe nucleus or incertus nucleus or central nucleus superior or rostral linear nucleus of the raphe or caudal linear nucleus of the raphe or rostral linear nucleus of raphe or nucleus raphe or Nucleus Raphe

Obscurus or Nucleus Raphe Pallidus or Solitary Nucleus or solitary nuclear complices or nucleus of tractus solitarius or complex solitary nuclear or tractus solitarii nuclei or nucleus solitarius or solitarius nucleus tractus or tractus solitarius nucleus or solitarius nuclei tractus or solitary tract nucleus or nucleus solitary tract or solitary nuclear complex or tractus solitarius nuclei or nuclear complices solitary or nuclei tractus solitarii or solitary nucleus or nucleus solitary or nucleus of the solitary tract or nuclear complex solitary or complices solitary nuclear or nucleus of solitary tract or nucleus tractus solitarius or Trigeminal Nucleus, Spinal or trigeminal nucleus spinal or nucleus spinal trigeminal or spinal trigeminal nucleus or Trigeminal Caudal Nucleus or caudal nucleus trigeminal or nucleus trigeminal caudal or trigeminal caudal nucleus or Metencephalon or Cerebellum or corpus cerebellum or parencephalons or cerebellus corpus or cerebellum or cerebellums or corpus cerebelli or parencephalon or cerebelli corpus or Cerebellar Cortex or cerebelli cortex or cortex cerebellus or cerebellar cortex or cortex cerebelli or cerebellus cortex or cortex cerebellar or Cerebellar Vermis or Purkinje Cells or purkinje cells or cells purkinje or Cerebellar Nuclei or nucleus dentatus or Cerebellopontine Angle or central nucleus or central nucleus or interposed nucleus anterior or nucleus globosus or medial cerebellar nucleus or emboliformis nucleus or nuclei cerebellar or intracerebellar nuclei or nucleus fastigii or nucleus fastigial or fastigii nucleus or central nuclei or nuclei central or deep cerebellar nucleus or intracerebellar nucleus or nucleus fastigial cerebellar or nucleus anterior interposed or nucleus intracerebellar or anterior interposed nucleus or nucleus anterior interpositus or nucleus medial cerebellar or nuclei intracerebellar or nucleus dentate or dentate nucleus or interpositus nucleus anterior or globosus nucleus or cerebellar nucleus deep or nucleus central or nucleus cerebellar or cerebellar nuclei deep or nucleus dentate cerebellar or anterior interpositus nucleus or cerebellar nucleus medial or cerebellar nuclei or fastigial cerebellar nucleus or Pons or pons or varolii pons or pontes or pons varolius or varolius pons or pons varolii or ponte or Barrington's Nucleus or Cochlear Nucleus or cochlear nucleus or nuclei cochlear or cochlear nuclei or nucleus cochlear or Kolliker-Fuse Nucleus or Middle Cerebellar Peduncle or Pontine Tegmentum or Abducens Nucleus or Facial Nucleus or Parabrachial Nucleus or Nucleus Raphe Magnus or Superior Olivary Complex or Trapezoid Body or Trigeminal Motor Nucleus or Vestibular Nuclei or schwalbes nucleus or nucleus schwalbe or vestibular nuclei or vestibular nucleus medial or nuclei vestibular or schwalbe's nucleus or nucleus schwalbe's or medial vestibular nucleus or schwalbe nucleus or nucleus medial vestibular or Vestibular Nucleus, Lateral or deiters nucleus or deiter's nucleus or nucleus of deiters or lateral vestibular nucleus or nucleus lateral vestibular or vestibularis laterali nucleus or nucleus vestibularis laterali or vestibular nucleus lateral or vestibularis magnocellularis nucleus or vestibularis magnocellularis nucleus or deiter nucleus or nucleus vestibularis magnocellularis or nucleus vestibularis magnocellulari or nucleus deiter or nucleus vestibularis lateralis or vestibularis lateralis nucleus or nucleus deiter's or Tectospinal Fibers or Trigeminal Nuclei or trigeminal nucleus or trigeminal nuclear complices or trigeminal nuclear complex or nuclei trigeminal or trigeminal nuclei or nucleus trigeminal or nuclear complices trigeminal or nuclear complex trigeminal or Grey Matter or grey matter or grey matters cerebellar or grey matter cerebellar or matters grey or matter cerebellar grey or grey matter cerebellar or cerebellar grey matters or grey matters or matter cerebellar grey or cerebellar grey matter or matters grey or cerebellar grey matters or matters cerebellar grey or grey matters cerebellar or matters cerebellar grey or grey matter or cerebellar grey matter or matter grey or matter grey or White Matter or white matter cerebellar or matter cerebellar white or matter white or matters cerebellar white or white matters cerebellar or cerebellar white matters or cerebellar white matter or matters white or white matter or white matters or Cerebral Ventricles or cerebral ventricle or cerebral ventricles or monro foramen or ventricles cerebral or foramen of monro or cerebral ventricular system or ventricle cerebral or Choroid Plexus or choroideus plexus or plexus choroideus or choroid plexus or chorioid plexus or plexus chorioid or plexus choroid or Ependyma or ependymal or ependymas or Fourth Ventricle or ventricolo quarto or ventricles fourth or ventricle fourth or 4th ventricle or quarto ventricolos or ventricle 4th or ventricles 4th or fourth ventricle or ventricolos quarto or fourth ventricles or 4th ventricles or quarto ventricolo or Lateral Ventricles or lateral ventricle or subventricular zones or lateral ventricles or ventricle lateral or zone subventricular or ventricles lateral or subventricular zone or zones subventricular or Septum Pellucidum or septum supracommissural or pelucidum septum or septum pellucidum or lucidums septum or supracommissural septum or pellucidum septum or septum pelucidums or septum pelucidum or pelucidums septum or septum lucidums or supracommissural septums or septums supracommissural or lucidum septum or septum lucidum or Third Ventricle or 3rd ventricle or ventricles third or ventricles 3rd or third ventricle or ventricle 3rd or 3rd ventricles or third ventricles or ventricle third or Limbic System or limbic system or system limbic or systems limbic or limbic systems or Amygdala or amygdaloid bodies or corpus amygdaloideum or nucleus intercalated amygdaloid or corpus amygdaloideum or amygdaloid body or complex amygdaloid nuclear or amygdaloid nuclear complices or amygdaloid nucleus or intercalata massa or amygdaloideum corpus or intercalatas massa or amygdaloid nucleus intercalated or nuclear complices amygdaloid or archistriatum or amygdala or massa intercalates or nucleus amygdaloid or amygdaloideum corpus or amygdalae nucleus or nuclear complex amygdaloid or archistriatum or nucleus amygdalae or amygdaloid nuclear complex or Basolateral Nuclear Complex or Central Amygdaloid Nucleus or Corticomедial Nuclear Complex or Periamygdaloid Cortex or epithalamus or Habenula or commissure habenular or habenula complex or habenulas or complices habenula or nucleus habenularis or habenular commissures or complex habenula or habenula complices or nucleus habenular or nucleus habenulari or commissures habenular or habenula or habenularum commissura or commissura habenularum or habenularis nucleus or habenular nuclei or commissura habenularum or nuclei habenular

or habenulari nucleus or habenular nucleus or Pineal Gland or pineales corpus or body pineal or glands pineal or pineal glands or pineal body or cerebri epiphysis or corpus pineales or gland pineal or pineale corpus or bodies pineal or corpus pineale or pineal gland or pineal bodies or epiphysis cerebri or Hippocampus or hippocampal formation or propers hippocampus or hippocampus propers or formations hippocampal or horn ammon's or schaffer collateral or ammon horn or hippocampus or horn ammon or cornu ammonis or hippocampus proper or proper hippocampus or collaterals schaffer or formation hippocampal or hippocampal formations or subiculum or subiculus or ammon's horn or CA1 Region, Hippocampal or regio superior of hippocampus or field hippocampus ca1 or ca1 stratum radiatum or stratum radiatum ca1 or hippocampal sector ca1 or hippocampus ca1 field or hippocampus regio superior or ca1 stratum radiatums or sector ca1 hippocampal or ca1 field hippocampus or radiatums ca1 stratum or stratum radiatums ca1 or ca1 hippocampal sector or ca1 pyramidal cell area or ca1 region hippocampal or ca1 pyramidal cell layer or ca1 stratum pyramidale or stratum pyramidale ca1 or cornu ammonis 1 area or radiatum ca1 stratum or CA2 Region, Hippocampal or ca2 stratum pyramidale or radiatums ca2 stratum or cornu ammonis 2 area or ca2 field hippocampus or stratum pyramidale ca2 or stratum radiatum ca2 or ca2 stratum radiatums or radiatum ca2 stratum or sector ca2 hippocampal or region hippocampal ca2 or ca2 field of hippocampus or stratum radiatums ca2 or ca2 region hippocampal or hippocampal sector ca2 or hippocampal ca2 region or hippocampus ca2 field or ca2 pyramidal cell layer or field hippocampus ca2 or ca2 pyramidal cell area or CA3 Region, Hippocampal or stratum lucidum ca3 or ca3 stratum lucidum or stratum lucidums ca3 or lucidum ca3 stratum or ca3 region hippocampal or ca3 pyramidal cell area or hippocampus ca3 field or ca3 hippocampal sector or sector ca3 hippocampal or ca3 stratum radiatum or ca3 stratum lucidums or hippocampal ca3 regions or cornu ammonis 3 area or ca3 field of hippocampus or radiatum ca3 stratum or field hippocampus ca3 or stratum radiatums ca3 or ca3 pyramidal cell layer or lucidums ca3 stratum or region hippocampal ca3 or radiatums ca3 stratum or ca3 stratum pyramidale or ca3 field hippocampus or Dentate Gyrus or ca4 region hippocampal or dentate fascia or cornu ammonis 4 area or hilus gyri dentate or ca4 field of hippocampal formation or ca4 hippocampal sector or gyrus dentate or sector ca4 hippocampal or hippocampal ca4 region or area dentata or region hippocampal ca4 or dentata area or field hippocampal ca4 or gyrus dentatus or hilus of the fascia dentata or hilus of dentate gyrus or dentate gyrus or area dentatas or dentata fascia or hippocampal sector ca4 or hippocampal ca4 field or ca4 of lorente de no or Mossy Fibers, Hippocampal or hippocampal mossy fiber or mossy fibers hippocampal).ab,kw,ti.

5. (hippocampal mossy fibers or mossy fiber hippocampal or Fornix, Brain or hippocampal commissure or hippocampal commissures or commissures dorsal hippocampal or fornix commissures or fornices or brain fimbrias or fornical commissures or fornical commissure or fornix or hippocampal commissures dorsal or commissures hippocampal or fornix-fimbria or hippocampal commissure dorsal or fimbria or fornix fimbria or fimbria of hippocampus or brain fornices or dorsal hippocampal commissure or commissure fornical or commissure dorsal hippocampal or commissure of fornix or commissures fornical or commissure hippocampal or fornix commissure or fimbria-fornix or fimbria fornix or fimbria brain or hippocampus fimbrias or hippocampus fimbria or brain fimbria or Hypothalamus or preoptico-hypothalamic areas or preoptico hypothalamic area or lamina terminalis or hypothalamus or areas preoptico-hypothalamic or area preoptico-hypothalamic or preoptico-hypothalamic area or Hypothalamic Area, Lateral or area hypothalamica laterali or hypothalamica laterali area or hypothalami area lateralis or lateralis area hypothalamica or hypothalamus area lateralis or laterali area hypothalamica or areas lateral hypothalamic or lateralis hypothalami area or lateral hypothalamic areas or accessory nucleus of the ventral horn or lateral tuberal nuclei or tuberal nucleus lateral or lateral hypothalamus or area hypothalamica lateralis or hypothalamus lateral or tuberomammillary nucleus or hypothalamic area lateral or nucleus tuberomammillary or nuclei lateral tuberal or nucleus lateral hypothalamic or lateralis hypothalamus area or area lateral hypothalamic or hypothalamic nucleus lateral or area lateralis hypothalamus or nucleus lateral tuberal or Hypothalamus, Anterior or commissures anterior hypothalamic or anterior hypothalamic decussation of ganser or hypothalamic commissures anterior or anterior hypothalamic commissures or commissure anterior hypothalamic or periventricular nucleus anteroventral or nucleus anteroventral periventricular or anterior hypothalamic commissure or hypothalamic commissure anterior or hypothalamus anterior or hypothalamus supraoptic or anteroventral periventricular nucleus or anterior hypothalamus or supraoptic hypothalamus or Anterior Hypothalamic Nucleus or areas anterior hypothalamic or hypothalamic area anterior or nucleus anterior hypothalamic or anterior hypothalamic nucleus or hypothalami nucleus anterior or hypothalamic areas anterior or anterior hypothalami nucleus or anterior hypothalamic area or area anterior hypothalamic or nucleus anterior hypothalamus or hypothalamus nucleus anterior or anterior hypothalamic areas or anterior hypothalamus nucleus or nucleus anterior hypothalami or hypothalamic nucleus anterior or Organum Vasculosum or Paraventricular Hypothalamic Nucleus or hypothalamic paraventricular nucleus or paraventricular hypothalamic nucleus or nucleus paraventricular hypothalamic or nucleus hypothalamic paraventricular or nucleus paraventricular or paraventricular nucleus or hypothalamic nucleus paraventricular or paraventricular nucleus hypothalamic or Preoptic Area or area medial preoptic or preoptic area medial or preoptic nucleus or nuclei preoptic or lateral preoptic area or preoptic areas lateral or area preoptic or areas medial preoptic or area lateral preoptic or preoptic areas medial or lateral preoptic areas or preoptica area or nucleus preoptic or medial preoptic areas or areas lateral preoptic or area preoptica or areas preoptic or preoptic nuclei or medial preoptic area or preoptic area or preoptic areas or Suprachiasmatic Nucleus or nucleus suprachiasmatic or suprachiasmatic nucleus or Supraoptic Nucleus or hypothalamus supraoptic

nucleus or supraoptic group accessory or accessory supraoptic groups or supraoptic nucleus of hypothalamus or supraopticus nucleus or groups accessory supraoptic or nucleus supraoptic or group accessory supraoptic or accessory supraoptic group or nucleus supraopticus or supraoptic groups accessory or supraoptic nucleus or Hypothalamus, Middle or regions intermediate hypothalamic or hypothalamic region intermediate or region intermediate hypothalamic or middle hypothalamus or hypothalamus medial or hypothalamic regions intermediate or intermediate hypothalamic regions or intermediate hypothalamic region or hypothalamus middle or medial hypothalamus or Arcuate Nucleus of Hypothalamus or nucleus arcuate or arcuate nucleus or hypothalamus arcuate nucleus or nucleus infundibular or infundibular nucleus or arcuate nucleus of hypothalamus or Dorsomedial Hypothalamic Nucleus or nucleus arcuate or arcuate nucleus or hypothalamus arcuate nucleus or nucleus infundibular or infundibular nucleus or arcuate nucleus of hypothalamus or Hypothalamo-Hypophyseal System or hypothalamic pituitary unit or hypothalamo hypophyseal system or hypothalamo-hypophyseal system or hypothalamic-pituitary unit or Median Eminence or eminentia medianas or median eminence or eminentias medial or eminence medial or medial eminentias or medianas eminentia or eminentia mediana or mediana eminentia or eminence median or medial eminence or Pituitary Gland or hypophyseal infundibulum or infundibular hypothalamus or pituitary glands or infundibulum or stalk infundibular or hypothalamus infundibular or infundibulums or pituitary stalks or pituitary gland or hypophysis or pituitary stalk or infundibular stem or stalks infundibular or glands pituitary or hypophysis cerebri or hypophyseal stalks or cerebri hypophysis or stalk hypophyseal or infundibular stalk or infundibular stalks or hypophysis cerebri or hypophyseal stalk or Pituitary Gland, Anterior or lobus anterior or anterior lobe of pituitary or anterior lobus or pituitary pars distalis or anterior pituitary glands or anterior lobus or lobus anterior or pituitary gland anterior or adenohipophyses or pituitary glands anterior or adenohipophysis or pituitary anterior lobe or anterior pituitary gland or pars distalis of pituitary or Corticotrophs or Gonadotrophs or lh producing cells or lh-secreting cells or fsh cells or gonadotrophs or lh cell or fsh-secreting cells or fsh secreting cells or fsh-producing cells or fsh-producing cell or fsh cell or lh-producing cells or fsh producing cells or lh secreting cells or fsh-secreting cell or gonadotroph or lh-producing cell or lh-secreting cell or lh cell or Lactotrophs or pituitary prolactin-secreting cells or lactotrophs or pituitary prolactin cell or prolactin-secreting cell pituitary or prolactin-secreting cells pituitary or lactotroph or prolactin cell pituitary or prolactin cells pituitary or pituitary prolactin cells or pituitary prolactin-secreting cell or pituitary prolactin secreting cells or Somatotrophs or gh cell pituitary or somatotrophs or gh cells pituitary or pituitary growth hormone-secreting cells or pituitary gh cell or pituitary growth hormone secreting cells or pituitary gh cells or somatotroph or Thyrotrophs or Pituitary Gland, Intermediate or Melanotrophs or Pituitary Gland, Posterior or lobes neural or posterior pituitary glands or neural lobe or pituitary pars nervosa or infundibular processes or infundibular process or process infundibular or neurohypophysis or lobe neural or gland posterior pituitary or pituitary posterior lobe or pars nervosa of pituitary or posterior lobe of pituitary or neural lobes or nervosus lobus or lobus nervosus or pituitary gland posterior or processes infundibular or Tuber Cinereum or cinereums tuber or cinereum tuber or tuber cinereum or tuber cinereums or Ventromedial Hypothalamic Nucleus or nucleus ventromedial hypothalamic or hypothalamic nucleus ventromedial or ventromedial hypothalamic nucleus or Hypothalamus, Posterior or posteriors area hypothalamica or area hypothalamica posterior or mammillary regions or region mammillary or nucleus posterior periventricular or hypothalamic regions posterior or hypothalamus posteriors or mammillary region or posterior area hypothalamica or posterior hypothalamic regions or supramammillary commissures or region posterior hypothalamic or supramammillary commissure or regions posterior hypothalamic or posterior hypothalamus or commissures supramammillary or premammillary nucleus or hypothalamic region posterior or posterior hypothalamic region or commissure supramammillary or hypothalamus posterior or hypothalamica posteriors area or periventricular nucleus posterior or nucleus premammillary or Mammillary Bodies or mammillary bodies or mammillary body or body mammillary or mamillary bodies or body mamillary or bodies mamillary or bodies mammillary or mamillary body or Limbic Lobe or Gyrus Cinguli or gyrus cingular or anterior cingulate gyrus or cingulate gyri posterior or cortex anterior cingulate or posterior cingulate gyrus or cinguli anterior gyrus or mesial region superior or gyrus cingulate or cingulate cortex anterior or cingulate cortex or superior mesial regions or regions cingulate or cortex posterior cingulate or anterior cingulate cortices or posterior cingulates or cingulate bodies or cingulates anterior or cortices anterior cingulate or posterior cingulate cortices or mesial regions superior or posterior cingulate cortex or regions posterior cingulate or cingulate posterior or posterior cingulate region or region posterior cingulate or body cingulate or cortex cingulate or posterior cingulate regions or cingulate gyrus anterior or cingulate gyrus or cingulate gyrus posterior or cingular gyrus or bodies cingulate or cingulate area or anterior cingulates or area cingulate or cingulate regions or regions superior mesial or ingulates posterior or areas cingulate or cingulate cortices anterior or anterior gyrus cinguli or gyri posterior cingulate or gyrus anterior cingulate or gyrus cinguli anterior or cinguli anterior gyrus or superior mesial region or anterior cingulate or gyrus cinguli anterior or cingulate anterior or region cingulate or cingulate areas or Parahippocampal Gyrus or gyrus parahippocampal or gyri parahippocampal or parahippocampal gyri posterior or hippocampal gyrus or gyri posterior parahippocampal or posterior parahippocampal gyrus or gyrus parahippocampalis or parahippocampal gyrus unicus or presubiculum or posterior parahippocampal gyri or gyrus posterior parahippocampal or parahippocampal gyrus posterior or unicus of parahippocampal gyrus or gyri hippocampal or parahippocampal gyrus or presubiculum or gyrus hippocampi or unicus parahippocampal gyrus or gyrus unicus parahippocampal or gyrus hippocampal or parahippocampal gyri or Entorhinal Cortex or area entorhinali or areas entorhinal or entorhinalis area or entorhinal area or area





6. (anterior pulvinar nucleus or pulvinar nucleus or nucleus anterior pulvinar or lateral pulvinar nucleus or pulvinar nucleus oral or oral pulvinar nucleus or pulvinar nucleus inferior or pulvinars or pulvinari nucleus or nucleus oral pulvinar or nucleus pulvinar or pulvinar thalami or nucleus pulvinari or nucleus lateral pulvinar or thalami pulvinar or nucleus inferior pulvinar or pulvinaris nucleus or nucleus pulvinaris or pulvinar thalamus or inferior pulvinar nucleus or pulvinar nucleus lateral or Mediodorsal Thalamic Nucleus or medialis dorsali nucleus or medial dorsal thalamic nucleus or mediodorsal nucleus or dorsomedialis thalamus nucleus or nucleus dorsomedial thalamic or nuclei medial thalamic or dorsali nucleus medialis or nucleus mediodorsal or nucleus dorsomedialis thalamus or nucleus medialis dorsali or nucleus mediodorsal thalamic or thalami nucleus dorsomedialis or thalamus nucleus dorsomedialis or thalamic nucleus medial or dorsomedialis thalami nucleus or thalamic nuclei medial or nucleus medial thalamic or mediodorsal thalamic nucleus or nucleus dorsomedial or nucleus medialis dorsalis or thalamic nucleus mediodorsal or dorsal medial nucleus or medialis dorsalis nucleus or nucleus dorsomedialis thalami or medial thalamic nucleus or Midline Thalamic Nuclei or parataenial nucleus or nucleus reunien or rhomboid nucleus or nucleus subfascular or nuclear group midline or paratenial nucleus or rhomboidal nucleus or rhomboid thalamic nucleus or nucleus rhomboid thalamic or reuniens nucleus or subfascular nucleus or thalamus nucleus reuniens or thalami nucleus reuniens or nucleus paraventricular thalamic or reunien nucleus or reuniens thalami nucleus or paraventricular nucleus of thalamus or paraventricular thalamic nucleus or midline thalamic nucleus or thalamic nuclei midline or paratenial thalamic nucleus or thalamic nucleus rhomboid or periventricular nuclei of thalamus or thalamic nucleus reuniens or reuniens thalamus nucleus or thalamus midline nucleus or nucleus paratenial or thalamus paraventricular nucleus or midline thalamic nuclei or thalamic nucleus subfascular or nucleus reuniens thalamus or thalamic nucleus paratenial or nucleus reuniens or nucleus rhomboid or thalamic nucleus paraventricular or midline nuclear group or Posterior Thalamic Nuclei or supergeniculate nucleus or posterior nuclear complex or nucleus supergeniculate or posterior thalamic nuclei or suprageniculate thalamic nucleus or submedial nucleus or limitans nucleus or thalamic nuclei posterior or nucleus limitans or thalamic nucleus suprageniculate or nucleus submedial or nuclear complex posterior or complex posterior nuclear or posterior nucleus of thalamus or nucleus limitans or nucleus suprageniculate thalamic or posterior thalamic nucleus or posterior thalamic nuclear group or posterior nuclear complex or nuclear complex posterior or thalamus posterior nucleus or Ventral Thalamic Nuclei or posterior nucleus ventral or ventrolateral thalamic nucleus or intermedius nucleus ventralis or ventral posterior nucleus or ventralis intermedius nucleus or ventrobasal complex or ventralis posteromedialis nucleus or nuclear mass ventral or group ventral nuclear or ventralis posterolateralis nucleus or nucleus ventral anterior or ventral nuclear groups or laterali nucleus ventralis or nucleus ventral posterolateral or ventralis posterior nucleus or masses ventral nuclear or nucleus ventralis posterolateralis or ventral lateral nucleus or nucleus ventralis intermedius or ventral anterior thalamic nucleus or thalamic nucleus ventral or posterolateralis nucleus ventralis or ventral posteromedial thalamic nucleus or nucleus ventrolateralis thalamus or ventrobasal complex or nucleus ventralis posteromedialis or nuclei ventral thalamic or nucleus ventrolateralis thalami or mass ventral nuclear or ventrolateralis thalami nucleus or ventrolateralis thalamus nucleus or posterolateral nucleus ventral or nuclear group ventral or arcuate nucleus 3 or nucleus ventralis posteriors or ventral posterior thalamic nucleus or ventral posterior medial nucleus or ventral posteroinferior nucleus or posteroinferior nucleus ventral or posteriors nucleus ventralis or arcuate nucleus-3 or thalamus nucleus ventrolateralis or nucleus ventralis or posteromedialis or complex ventrobasal or ventral lateral thalamic nucleus or ventral thalamic nuclei or ventral lateral thalamic nuclei or ventral posteromedial nucleus or posteromedialis nucleus ventralis or ventral anterior nucleus or ventral posterolateral nucleus or nuclear masses ventral or ventral posterior inferior thalamic nucleus or thalamic nucleus ventrolateral or ventral nuclear group or thalamus ventrolateral or thalami nucleus ventrolateralis or posteromedialis nucleus ventralis or posterolateralis nucleus ventralis or posterior nucleus ventralis or nucleus ventral posteromedial or nucleus ventralis laterali or ventral posterolateral thalamic nucleus or nucleus ventral thalamic or ventralis lateralis nucleus or ventral nuclear mass or ventralis posteriors nucleus or ventralis laterali nucleus or nucleus ventral posterior or ventral thalamic nucleus or ventrolateral thalamus or nucleus ventralis lateralis or Telencephalon or telencephalon or endbrain or endbrains or Cerebrum or cerebrum or cerebral hemisphere left or cerebral hemisphere right or cerebral hemispheres or right cerebral hemisphere or cerebral hemisphere or left cerebral hemisphere or Basal Ganglia or ganglia basal or nuclei basal or basal ganglia or ganglion basal or basal nuclei or claustrum or Corpus Striatum or lenticular nucleus or nucleus lentiform or lentiformis nucleus or lentiform nucleus or corpus striatum or nucleus lenticular or nucleus lentiformis or lentiform nuclei or striatum corpus or nuclei lentiform or Globus Pallidus or pallidum or paleostriatum or globus pallidus or pallidums or Neostriatum or Caudate Nucleus or nucleus caudatus or caudate nucleus or caudatus nucleus or nucleus caudate or caudatus or High Vocal Center or Putamen or putamens or nucleus putamens or putamens nucleus or putamen nucleus or nucleus putamen or putamen or Ventral Striatum or Nucleus Accumbens or nucleus accumbens or accumbens septus nucleus or accumbens septi nucleus or nucleus accumbens septi or septi nucleus accumbens or accumbens nucleus or septus nucleus accumbens or nucleus accumbens septus or Olfactory Tubercle or Islands of Calleja or Basal Nucleus of Meynert or nucleus basalis of meynert or meynert basal nucleus or nucleus basalis magnocellularis or basal nucleus of meynert or meynert nucleus basalis or Cerebral Cortex or plates cortical or insular cortex or cerebral cortices or archipalliums or paleocortex or allocortices or periallocortices or plate cortical or cerebri cortex or cortices cerebral or paleocortices or cortices insular or insular cortices or cortex insular or periallocortex or archipallium or cortical plates or cortex cerebral or cortex cerebri or reil insula or cortex cerebri or

cortical plate or Frontal Lobe or gyrus anterior central or central gyrus anterior or lobe frontal or frontal lobe or cortex frontal or gyrus precentralis or frontal eye field or supplementary eye field or gyrus precentralis or frontalis lobus or precentralis gyrus or frontal lobes or frontal cortex or field supplementary eye or lobes frontal or eye field supplementary or lobus frontalis or supplementary eye fields or frontalis lobus or gyrus precentral or eye fields supplementary or eye fields frontal or anterior central gyrus or fields frontal eye or lobus frontalis or Motor Cortex or motor area or primary motor cortex or motor area precentral or strip motor or somatomotor areas or strips motor or motor cortices primary or premotor areas or motor area secondary or cortex precentral motor or motor area somatic or supplementary motor areas or area primary motor or area premotor or secondary motor area or motor cortices secondary or area motor or secondary motor areas or area somatomotor or motor areas or motor cortex secondary or precentral motor areas or cortices secondary motor or area supplementary motor or motor areas supplementary or area precentral motor or cortices primary motor or precentral motor cortices or areas somatic motor or area somatic motor or areas motor or motor cortex precentral or motor areas precentral or motor strips or cortex primary motor or somatomotor area or premotor area or precentral motor cortex or primary motor area or somatic motor area or motor areas somatic or areas premotor or areas somatomotor or areas precentral motor or areas supplementary motor or motor cortex primary or cortex secondary or motor primary motor cortices or motor cortex or motor cortices precentral or motor area supplementary or cortices precentral motor or somatic motor areas or cortex motor or areas secondary motor or Prefrontal Cortex or orbital gyrus).ab,kw,ti.

7. (gyrus orbital or sulcus olfactory or convolutions superior frontal or orbitofrontal cortices lateral or gyrus frontalis superior or rectal gyrus or cortices ventromedial prefrontal or orbital cortices or cortex orbital or prefrontal cortices ventromedial or inferior gyrus frontalis or orbital gyri or orbital area or convolution superior frontal or frontalis superior gyrus or inferior frontal gyrus or gyri orbitofrontal or orbitofrontal regions or frontalis inferior gyrus or frontal sulcus or prefrontal cortex ventromedial or straight gyrus or cortex lateral orbitofrontal or gyrus frontalis inferior or sulci olfactory or orbital areas or orbitofrontal gyri or area orbital or orbitofrontal region or cortices lateral orbitofrontal or lateral orbitofrontal cortex or superior frontal convolution or cortex orbitofrontal or medial frontal gyrus or gyrus orbitofrontal or gyrus straight or superior frontal gyrus or frontal gyrus medial or ventromedial prefrontal cortex or gyrus rectal or subcallosal area or olfactory sulcus or prefrontal cortex or superior frontal convolutions or sulcus frontal or olfactory sulci or region orbitofrontal or superior gyrus frontalis or superior gyrus frontalis or gyrus superior frontal or orbitofrontal cortex or frontal gyrus inferior or gyrus frontalis inferior or cortex ventromedial prefrontal or marginal gyrus or rectus gyrus or orbital cortex or gyrus medial frontal or orbital gyrus or orbitofrontal gyrus or inferior gyrus frontalis or frontal gyrus superior or gyri orbital or areas orbital or cortex prefrontal or cortices orbital or gyrus rectus or frontalis superior gyrus or lateral orbitofrontal cortices or orbitofrontal cortices or gyrus frontalis superior or orbitofrontal cortex lateral or gyrus marginal or Broca Area or Neocortex or neocortical molecular layer or neocortices cerebral or isocortex or cerebral neocortices or neopallium or corticalis substantia or multiform layer neocortical or neocortical multiform layer or layer neocortical molecular or cortices neopallial or neopallial cortex or neocortical internal pyramidal layer or molecular layer neocortical or neopallial cortices or cortex neopallial or layers neocortical multiform or neocortex cerebral or molecular layers neocortical or neocortical internal granular layer or neocortical multiform layers or cerebral neocortex or neocortical external pyramidal layer or neocortical molecular layers or isocortices or external granular layer or substantia corticalis or corticalis substantia or layer neocortical multiform or multiform layers neocortical or Occipital Lobe or occipital cortex or cuneus or gyrus annectant or sulcus lunate or gyrus lingual or gyrus occipital or calcarine fissures or regions occipital or occipitotemporal gyrus medial or sulcus calcarine or lunate sulcus or occipital lobe or gyrus medial occipitotemporal or cuneate lobule or region occipital or fissures calcarine or calcarinus sulcus or sulcus calcarinus or lobe occipital or lobes occipital or occipital region or gyrus lingual or occipital gyrus or annectant gyrus or occipital regions or lobules cuneate or occipital sulcus or cortices occipital or calcarine sulcus or fissure calcarine or lingual gyrus or lobule cuneate or cortex cuneus or lingual gyrus or Visual Cortex or primary visual cortices or visual cortex primaries or primaries visual cortex or cortices extrastriate or visual cortices primary or extrastriate cortices or cortex primaries visual or cortex primary visual or striate cortex or cortices primary visual or visual cortex primary or visual cortex or cortex striate or cortex extrastriate or cortex visual or extrastriate cortex or primary visual cortex or Olfactory Cortex or Basal Forebrain or Piriform Cortex or sulcus intraparietal or regions parietal or lobes parietal or paracentral lobules posterior or gyrus supramarginal or precuneus cortices or parietal cortex or gyrus angularis or praecuneus or gyrus angularis or gyrus supramarginalis or parietal regions or gyrus prelunate or lobules parietal or lobe parietal or parietal cortices posterior or gyrus supramarginalis or angularis gyrus or supramarginalis gyrus or marginal sulcus or posterior parietal cortex or prelunate gyrus or posterior parietal cortices or intraparietal sulcus or angularis gyrus or region parietal or parietal lobules or precuneus or cortex parietal or gyrus angular or precuneus cortex or lobule parietal or parietal lobule or cortices precuneus or posterior paracentral lobule or lobules posterior paracentral or sulcus marginal or posterior paracentral lobules or Parietal Lobe or sulcus intraparietal or regions parietal or lobes parietal or paracentral lobules posterior or gyrus supramarginal or precuneus cortices or parietal cortex or gyrus angularis or praecuneus or gyrus angularis or gyrus supramarginalis or parietal regions or gyrus prelunate or lobules parietal or lobe parietal or parietal cortices posterior or gyrus supramarginalis or angularis gyrus or supramarginalis gyrus or marginal sulcus or posterior parietal cortex or prelunate gyrus or posterior parietal cortices or intraparietal sulcus or angularis gyrus or

region parietal or parietal lobules or precuneus or cortex parietal or gyrus angular or precuneus cortex or lobule parietal or parietal lobule or cortices precuneus or posterior paracentral lobule or lobules posterior paracentral or sulcus marginal or posterior paracentral lobules or somatosensory Cortex or postcentral gyrus or somatosensory cortices primary or somatosensory cortex primary or cortex anterior parietal or cortices anterior parietal or cortices primary somatosensory or anterior parietal cortices or cortex secondary sensory or areas primary somatosensory or primary somatosensory cortices or cortex si or gyrus post central or secondary somatosensory areas or post central gyrus or parietal cortices anterior or gyrus postcentrali or secondary somatosensory cortex or somatosensory cortex or areas secondary somatosensory or somatosensory cortex secondary or area primary somatosensory or postcentralis gyrus or cortices secondary sensory or secondary sensory cortex or primary somatosensory cortex or somatosensory areas secondary or si cortex or primary somatosensory areas or secondary somatosensory cortices or gyrus postcentralis or area secondary somatosensory or primary somatosensory area or cortex primary somatosensory or secondary somatosensory area or secondary sensory cortices or cortices secondary somatosensory or primary somatic sensory area or postcentrali gyrus or gyrus postcentral or Wernicke Area or Sensorimotor Cortex or Auditory Cortex or gyrus transverse temporal or auditory areas temporal or temporal auditory areas or areas auditory or cortex primary auditory or transverse temporal gyrus or cortex auditory or auditory areas or transverse temporal gyri or convolutions heschl's or auditory cortex or auditory area or auditory cortex primary or auditory cortices primary or areas temporal auditory or area auditory or gyri transverse temporal or primary auditory cortices or heschl gyri or heschl convolutions or temporal gyri transverse or auditory area temporal or temporal auditory area or heschls gyri or primary auditory cortex or Temporal Lobe or temporal operculums or superior temporal gyrus or occipito-temporal gyrus lateral or gyrus fusiform or gyrus lateral occipito-temporal or gyrus temporalis superior or occipitotemporal gyrus or horns temporal or inferior horn of lateral ventricle or temporal sulcus or regions temporal or operculums temporal or cortex temporal or lobes temporal or planum polares or temporalis superior gyrus or gyrus superior temporal or horn temporal or lobe temporal or temporal horn or temporal cortices or gyrus lateral occipitotemporal or temporalis superiors gyrus or region temporal or fusiformi gyrus or temporal region or temporal horns or lateral occipito-temporal gyrus or temporal cortex or gyrus temporal or temporal operculum or temporal regions or operculum temporal or cortices temporal or temporal horn of the lateral ventricle or polare planum or fusiformis gyrus or sulcus temporal or polares planum or planum polare or temporal lobe or Diagonal Band of Broca or diagonal band of broca or broca diagonal band or External Capsule or olfactory tracts or olfactory tract lateral or main olfactory bulbs or bulbs main olfactory or bulb olfactory or glomerulus olfactory or lateral olfactory tracts or olfactory tract or bulb main olfactory or olfactory bulbs or olfactory bulb main or accessory olfactory bulb or accessory olfactory bulbs or tracts olfactory or bulbs accessory olfactory or olfactory glomerulus or bulbs olfactory or olfactory bulb accessory or tract olfactory or bulb accessory olfactory or tract lateral olfactory or olfactorius bulbus or olfactory bulb or lateral olfactory tract or Olfactory Bulb or olfactory tracts or olfactory tract lateral or main olfactory bulbs or bulbs main olfactory or bulb olfactory or glomerulus olfactory or lateral olfactory tracts or olfactory tract or bulb main olfactory or olfactory bulbs or olfactory bulb main or accessory olfactory bulb or accessory olfactory bulbs or tracts olfactory or bulbs accessory olfactory or olfactory glomerulus or bulbs olfactory or olfactory bulb accessory or tract olfactory or bulb accessory olfactory or tract lateral olfactory or olfactorius bulbus or olfactory bulb or lateral olfactory tract or Telencephalic Commissures or Anterior Cerebellar Commissure or Corpus Callosum or corpus callosums or commissures neocortical or neocortical commissures or corpus callosum or callosums corpus or interhemispheric commissure or interhemispheric commissures or neocortical commissure or callosum corpus or commissures interhemispheric or commissure interhemispheric or commissure neocortical or Internal Capsule or internal capsules or interna capsula or capsules internal or capsule internal or capsula internas or internal capsule or capsula interna or internas capsula or Myelencephalon).ab,kw,ti.

8. (animal not human).ab,kw,ti.

9. (in vitro not in vivo).ab,kw,ti.

10. 4 or 5 or 6 or 7

11. (((Alzheimer\* or dement\* or ase or amentia\* or mild) adj2 cognitive adj2 impairment) or cognitive) adj2 decline).ti,ab,kw.

12. alzheimer\*.ti,ab,kw.

13. ase.ti,ab,kw.

14. (mild adj2 cognitive adj2 impairment).ti,ab,kw.

15. (cognitive adj2 decline).ti,ab,kw.

16. dement\*.ti,ab,kw.

17. amentia\*.ti,kw,ab.

18. 12 or 13 or 14 or 15

19. 12 or 13 or 14 or 15 or 16 or 17

20. 3 and 10 and 18 → actual used

21. 3 and 10 and 19

|                          |           |                                    |   |             |                 |         |        |
|--------------------------|-----------|------------------------------------|---|-------------|-----------------|---------|--------|
| <input type="checkbox"/> | 15        | (cognitive adj2 decline).ti,ab,kw. | ▶ | 13327       | Advanced        | Display | More > |
| <input type="checkbox"/> | 16        | dement*.ti,ab,kw.                  | ▶ | 80123       | Advanced        | Display | More > |
| <input type="checkbox"/> | 17        | ementia*.ti,kw,ab.                 | ▶ | 96          | Advanced        | Display | More > |
| <input type="checkbox"/> | 18        | 12 or 13 or 14 or 15               | ▶ | 118797      | Advanced        | Display | More > |
| <input type="checkbox"/> | 19        | 12 or 13 or 14 or 15 or 16 or 17   | ▶ | 165058      | Advanced        | Display | More > |
| <input type="checkbox"/> | <b>20</b> | <b>3 and 10 and 18</b>             | ▶ | <b>9403</b> | <b>Advanced</b> | Display | More > |
| <input type="checkbox"/> | 21        | 3 and 10 and 19                    | ▶ | 11373       | Advanced        | Display | More > |

Remove Selected Save Selected | Combine selections with:  And  Or  RRS

Save Search History

Advanced Search | Basic Search | Find Citation | Search Tools | Search Fields | Multi-Field Search

2 Resources selected | [Hide](#) | [Change](#)

**Ovid MEDLINE(R)** 1946 to October Week 1 2015, **Ovid MEDLINE(R) In-Process & Other Non-Indexed Citations** October 13, 2015

Enter keyword or phrase (\* or \$ for truncation)

Keyword  Author  Title  Journal

Limit to (s)  Include All Fields  Map Term to Subject Headings

# Psych Info - October 15<sup>th</sup> 2015 – 2824 references

Ovid: Search Form | www.who.int/hrh/educati... | Managing database over...

ovidsp.tx.ovid.com.myaccess.library.utoronto.ca/sp-3.17.0a/ovidweb.cgi

|                          |    |                                    |             |                 |         |        |
|--------------------------|----|------------------------------------|-------------|-----------------|---------|--------|
| <input type="checkbox"/> | 18 | (cognitive adj2 decline).ti.ab.kw. | 7836        | Advanced        | Display | More > |
| <input type="checkbox"/> | 19 | 1 or 3 or 4 or 5 or 6 or 7 or 9    | 68906       | Advanced        | Display | More > |
| <input type="checkbox"/> | 20 | exp Alzheimer's Disease/           | 35623       | Advanced        | Display | More > |
| <input type="checkbox"/> | 21 | 15 or 16 or 17 or 18 or 20         | 52694       | Advanced        | Display | More > |
| <input type="checkbox"/> | 22 | 2 or 10 or 11 or 12 or 13          | 370955      | Advanced        | Display | More > |
| <input type="checkbox"/> | 23 | 19 and 21 and 22                   | 3008        | Advanced        | Display | More > |
| <input type="checkbox"/> | 24 | <b>23 not 14</b>                   | <b>2824</b> | <b>Advanced</b> | Display | More > |

Remove Selected | Save Selected | Combine selections with:  And  Or

**Advanced Search** | Basic Search | Find Citation | Search Tools | Search Fields | Multi-Field Search

1 Resource selected | [Hide](#) | [Change](#)

**PsycINFO** 1806 to October Week 2 2015

Enter keyword or phrase (\* or \$ for truncation)

Keyword  Author  Title  Journal

**Limits** (close)

Include Multimedia  Map Term to Subject Heading

Full Text  PsycARTICLES Journals  All Journals

11:22 AM 15/10/2015

Updated search medline only microglia terms. Feb 23<sup>rd</sup> 2017, 250 returned (not excluding duplicates)

The screenshot shows a search results page from Ovid. The search query is: (nissl or gliosis or glia\* or microglia\* or Macrophage\* or monocyte\* or CD 11 or CD11 or CD 11b or CD11b or CD68 or CD40 or CD45 or OX-42 or OX42 or ed-1 or ed1 or cd200 or cd 200 or Iba 1 or Iba1 or ly6g or cd3 or mpo or mcp1 or mcp-1 or ccr2 or arg1 or arg 1 or mhc or major histocompatibility complex or aldh1 or aldh 1 or hla dr or cd20 or HLA).ab,kw,ti. The results table shows 16 items, with the 16th item selected, indicating 250 results. The browser's taskbar at the bottom shows the time as 11:55 on 2/23/2017.

| ID | Search Terms                                                                                                                                                                                                                                                                                                                                                           | Count   | Advanced | Display Results | More |
|----|------------------------------------------------------------------------------------------------------------------------------------------------------------------------------------------------------------------------------------------------------------------------------------------------------------------------------------------------------------------------|---------|----------|-----------------|------|
| 8  | (nissl or gliosis or glia* or microglia* or Macrophage* or monocyte* or CD 11 or CD11 or CD 11b or CD11b or CD68 or CD40 or CD45 or OX-42 or OX42 or ed-1 or ed1 or cd200 or cd 200 or Iba 1 or Iba1 or ly6g or cd3 or mpo or mcp1 or mcp-1 or ccr2 or arg1 or arg 1 or mhc or major histocompatibility complex or aldh1 or aldh 1 or hla dr or cd20 or HLA).ab,kw,ti. | 570301  | Advanced | Display Results | More |
| 9  | (alzheimer* or dementia* or amnesia* or ase).ti,kw,ab.                                                                                                                                                                                                                                                                                                                 | 174853  | Advanced | Display Results | More |
| 10 | 2 or 9                                                                                                                                                                                                                                                                                                                                                                 | 209387  | Advanced | Display Results | More |
| 11 | 1 or 8                                                                                                                                                                                                                                                                                                                                                                 | 1136943 | Advanced | Display Results | More |
| 12 | 3 or 4 or 5 or 6 or 7                                                                                                                                                                                                                                                                                                                                                  | 1604555 | Advanced | Display Results | More |
| 13 | 10 and 11 and 12                                                                                                                                                                                                                                                                                                                                                       | 10439   | Advanced | Display Results | More |
| 14 | 13                                                                                                                                                                                                                                                                                                                                                                     | 10439   | Advanced | Display Results | More |
| 15 | limit 13 to (humans and yr="2016 -Current")                                                                                                                                                                                                                                                                                                                            | 250     | Advanced | Display Results | More |
| 16 | from 15 keep 1-250                                                                                                                                                                                                                                                                                                                                                     | 250     | Advanced | Display Results | More |

Microglia terms:

(nissl or gliosis or glia\* or microglia\* or Macrophage\* or monocyte\* or CD 11 or CD11 or CD 11b or CD11b or CD68 or CD40 or CD45 or OX-42 or OX42 or ed-1 or ed1 or cd200 or cd 200 or Iba 1 or Iba1 or ly6g or cd3 or mpo or mcp1 or mcp-1 or ccr2 or arg1 or arg 1 or mhc or major histocompatibility complex or aldh1 or aldh 1 or hla dr or cd20 or HLA).ab,kw,ti.

exp neuroglia/ or exp leukocytes/ or exp antibody-producing cells/ or exp antigen-presenting cells/ or exp neurogenic inflammation/

## EMBASE update from 2015 to feb 23<sup>rd</sup> 2017

### Repeated only for microglia terms excluding reviews and conference proceedings

The screenshot displays a web browser window with the Ovid search interface. The address bar shows the URL: `ovidsp.tx.ovid.com.myaccess.library.utoronto.ca/sp-3.24.0a/ovidweb.cgi`. The search results are presented as a list of filters, each with a checkbox, a description, a count, and the search type (Advanced). Filter 26, "from 25 keep 1-694", is selected and highlighted in blue.

| Filter ID | Filter Description                                                                                                                              | Count | Search Type | Actions              |
|-----------|-------------------------------------------------------------------------------------------------------------------------------------------------|-------|-------------|----------------------|
| 18        | 9 and 14 and 17                                                                                                                                 | 12123 | Advanced    | Display Results More |
| 19        | limit 18 to ("reviews (maximizes sensitivity)" or "reviews (maximizes specificity)" or "reviews (best balance of sensitivity and specificity)") | 3142  | Advanced    | Display Results More |
| 20        | limit 18 to (conference abstract or conference paper or conference proceeding or "conference review" or editorial)                              | 2675  | Advanced    | Display Results More |
| 21        | 18 not (19 or 20)                                                                                                                               | 6564  | Advanced    | Display Results More |
| 22        | limit 21 to yr="2016 -Current"                                                                                                                  | 633   | Advanced    | Display Results More |
| 23        | limit 21 to yr="2016 -Current"                                                                                                                  | 633   | Advanced    | Display Results More |
| 24        | limit 23 to human                                                                                                                               | 311   | Advanced    | Display Results More |
| 25        | limit 21 to (human and yr="2015 -Current")                                                                                                      | 694   | Advanced    | Display Results More |
| 26        | from 25 keep 1-694                                                                                                                              | 694   | Advanced    | Display Results More |

Below the list, there are buttons for "Save", "Remove", and "Combine with: AND OR". At the bottom of the search area, there are buttons for "Save All", "Edit", "Create RSS", and "View Saved".

The search bar at the bottom contains the text "1 Resource selected | Hide | Change" and "Embase Classic+Embase 1947 to 2017 February 22". The search type is set to "Keyword". The search bar also includes a "Search" button and a "Find in page" dropdown menu.

The Windows taskbar at the bottom shows the time as 2:34 PM on 2017-02-23, with the language set to ENG.

## PsychInfo update from 2015 to feb 23<sup>rd</sup> 2017

Repeated only for microglia terms, excluding reviews and conference proceedings

In addition to neuroglia.exp, used:

| ovidsp.tx.ovid.com.myaccess.library.utoronto.ca/sp-3.24.1b/ovidweb.cgi?&S=GBJNFBPCMDNDIUNCHKB                                                                                                                                                                          |    | Search                                                                                                                                                                                                                                                                                                                                                                    | ☆      | 📄        | ↓                               | 🏠                      | 🔒 |
|------------------------------------------------------------------------------------------------------------------------------------------------------------------------------------------------------------------------------------------------------------------------|----|---------------------------------------------------------------------------------------------------------------------------------------------------------------------------------------------------------------------------------------------------------------------------------------------------------------------------------------------------------------------------|--------|----------|---------------------------------|------------------------|---|
| commissure interhemispheric or commissure neocortical or Internal Capsule or internal capsules or interna capsula or capsules internal or capsule internal or capsula internas or internal capsule or capsula interna or internas capsula or Myelencephalon).ab,kw,ti. |    |                                                                                                                                                                                                                                                                                                                                                                           |        |          |                                 |                        |   |
| <input type="checkbox"/>                                                                                                                                                                                                                                               | 8  | alzheimer*.ti,ab,kw.                                                                                                                                                                                                                                                                                                                                                      | 49115  | Advanced | <a href="#">Display Results</a> | <a href="#">More ▾</a> |   |
| <input type="checkbox"/>                                                                                                                                                                                                                                               | 9  | exp Alzheimer's Disease/                                                                                                                                                                                                                                                                                                                                                  | 39086  | Advanced | <a href="#">Display Results</a> | <a href="#">More ▾</a> |   |
| <input type="checkbox"/>                                                                                                                                                                                                                                               | 10 | nissl or gliosis or glia* or microglia* or Macrophage* or monocyte* or CD 11 or CD11 or CD 11b or CD11b or CD68 or CD40 or CD45 or OX-42 or OX42 or ed-1 or ed1 or cd200 or cd 200 or iba 1 or iba1 or ly6g or cd3 or mpo or mcp1 or mcp-1 or ccr2 or arg1 or arg 1 or mhc or major histocompatibility complex or hla dr or cd20 or HLA (Including Limited Related Terms) | 0      | Basic    | <a href="#">Display Results</a> | <a href="#">More ▾</a> |   |
| <input type="checkbox"/>                                                                                                                                                                                                                                               | 11 | microglia* (Including Limited Related Terms)                                                                                                                                                                                                                                                                                                                              | 6127   | Basic    | <a href="#">Display Results</a> | <a href="#">More ▾</a> |   |
| <input type="checkbox"/>                                                                                                                                                                                                                                               | 12 | cd adj2 11 OR cd68 or CD11 OR cd11b or CD40 or CD45 OR ox-42 or OX42 or iba or ionized calcium-binding adaptor molecule or ionized calcium binding adaptor molecule (Including Limited Related Terms)                                                                                                                                                                     | 8      | Basic    | <a href="#">Display Results</a> | <a href="#">More ▾</a> |   |
| <input type="checkbox"/>                                                                                                                                                                                                                                               | 13 | iba (Including Limited Related Terms)                                                                                                                                                                                                                                                                                                                                     | 315    | Basic    | <a href="#">Display Results</a> | <a href="#">More ▾</a> |   |
| <input type="checkbox"/>                                                                                                                                                                                                                                               | 14 | ionized calcium-binding adapter (Including Limited Related Terms)                                                                                                                                                                                                                                                                                                         | 1800   | Basic    | <a href="#">Display Results</a> | <a href="#">More ▾</a> |   |
| <input type="checkbox"/>                                                                                                                                                                                                                                               | 15 | ionized calcium binding adapter (Including Limited Related Terms)                                                                                                                                                                                                                                                                                                         | 1800   | Basic    | <a href="#">Display Results</a> | <a href="#">More ▾</a> |   |
| <input type="checkbox"/>                                                                                                                                                                                                                                               | 16 | hla (Including Limited Related Terms)                                                                                                                                                                                                                                                                                                                                     | 1058   | Basic    | <a href="#">Display Results</a> | <a href="#">More ▾</a> |   |
| <input type="checkbox"/>                                                                                                                                                                                                                                               | 17 | human leukocyte antigen (Including Limited Related Terms)                                                                                                                                                                                                                                                                                                                 | 404    | Basic    | <a href="#">Display Results</a> | <a href="#">More ▾</a> |   |
| <input type="checkbox"/>                                                                                                                                                                                                                                               | 18 | cd11 (Including Limited Related Terms)                                                                                                                                                                                                                                                                                                                                    | 5      | Basic    | <a href="#">Display Results</a> | <a href="#">More ▾</a> |   |
| <input type="checkbox"/>                                                                                                                                                                                                                                               | 19 | cd 11 (Including Limited Related Terms)                                                                                                                                                                                                                                                                                                                                   | 10     | Basic    | <a href="#">Display Results</a> | <a href="#">More ▾</a> |   |
| <input type="checkbox"/>                                                                                                                                                                                                                                               | 20 | cd45 (Including Limited Related Terms)                                                                                                                                                                                                                                                                                                                                    | 147    | Basic    | <a href="#">Display Results</a> | <a href="#">More ▾</a> |   |
| <input type="checkbox"/>                                                                                                                                                                                                                                               | 21 | cd 45 (Including Limited Related Terms)                                                                                                                                                                                                                                                                                                                                   | 24     | Basic    | <a href="#">Display Results</a> | <a href="#">More ▾</a> |   |
| <input type="checkbox"/>                                                                                                                                                                                                                                               | 22 | cd40 (Including Limited Related Terms)                                                                                                                                                                                                                                                                                                                                    | 131    | Basic    | <a href="#">Display Results</a> | <a href="#">More ▾</a> |   |
| <input type="checkbox"/>                                                                                                                                                                                                                                               | 23 | cd 40 (Including Limited Related Terms)                                                                                                                                                                                                                                                                                                                                   | 133    | Basic    | <a href="#">Display Results</a> | <a href="#">More ▾</a> |   |
| <input type="checkbox"/>                                                                                                                                                                                                                                               | 24 | ox42 (Including Limited Related Terms)                                                                                                                                                                                                                                                                                                                                    | 46     | Basic    | <a href="#">Display Results</a> | <a href="#">More ▾</a> |   |
| <input type="checkbox"/>                                                                                                                                                                                                                                               | 25 | ox-42 (Including Limited Related Terms)                                                                                                                                                                                                                                                                                                                                   | 107    | Basic    | <a href="#">Display Results</a> | <a href="#">More ▾</a> |   |
| <input type="checkbox"/>                                                                                                                                                                                                                                               | 26 | mhc (Including Limited Related Terms)                                                                                                                                                                                                                                                                                                                                     | 1066   | Basic    | <a href="#">Display Results</a> | <a href="#">More ▾</a> |   |
| <input type="checkbox"/>                                                                                                                                                                                                                                               | 27 | major histocompatibility complex (Including Limited Related Terms)                                                                                                                                                                                                                                                                                                        | 987    | Basic    | <a href="#">Display Results</a> | <a href="#">More ▾</a> |   |
| <input type="checkbox"/>                                                                                                                                                                                                                                               | 28 | 1 or 4 or 5 or 6 or 7                                                                                                                                                                                                                                                                                                                                                     | 413345 | Advanced | <a href="#">Display Results</a> | <a href="#">More ▾</a> |   |
| <input type="checkbox"/>                                                                                                                                                                                                                                               | 29 | 2 or 27 or 26 or 25 or 24 or 23 or 22 or 21 or 20 or 19 or 18 or 17 or 16 or 15 or 14 or 13 or 11                                                                                                                                                                                                                                                                         | 16414  | Advanced | <a href="#">Display Results</a> | <a href="#">More ▾</a> |   |
| <input type="checkbox"/>                                                                                                                                                                                                                                               | 30 | 9 or 8 or 3                                                                                                                                                                                                                                                                                                                                                               | 50493  | Advanced | <a href="#">Display Results</a> | <a href="#">More ▾</a> |   |
| <input type="checkbox"/>                                                                                                                                                                                                                                               | 31 | 28 and 29 and 30                                                                                                                                                                                                                                                                                                                                                          | 1193   | Advanced | <a href="#">Display Results</a> | <a href="#">More ▾</a> |   |
| <input type="checkbox"/>                                                                                                                                                                                                                                               | 32 | limit 31 to (human and yr="2015 -Current")                                                                                                                                                                                                                                                                                                                                | 123    | Advanced | <a href="#">Display Results</a> | <a href="#">More ▾</a> |   |
